# Supplementary material for: Pharmacophore Synergism in Diverse Scaffold Clinches in Aurora Kinase B
Source: MDPI journal article supplement (doi:10.3390/ijms232314527), 2022-11-22

|                                                                                                                                                                                                                                                |                                                                                                                                                                                                                                                |                                                                                                                                                                                                                                                |
|------------------------------------------------------------------------------------------------------------------------------------------------------------------------------------------------------------------------------------------------|------------------------------------------------------------------------------------------------------------------------------------------------------------------------------------------------------------------------------------------------|------------------------------------------------------------------------------------------------------------------------------------------------------------------------------------------------------------------------------------------------|
| <p>1 148</p> 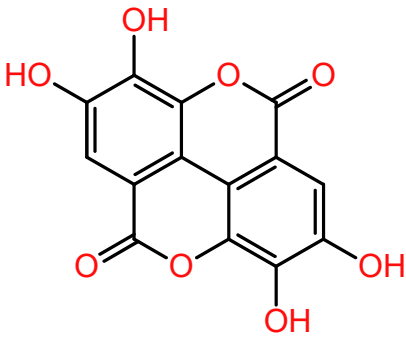 <p>IC50(nM):2500<br/>fringNplaN4B:0<br/>fsp3Csp2N5B:0<br/>N_H_2B:0<br/>fsp2Osp2C5B:0<br/>da_lipo_5B:6<br/>fringNC6B:0<br/>fOringC6B:0</p>       | <p>2 3666</p>  <p>IC50(nM):910<br/>fringNplaN4B:0<br/>fsp3Csp2N5B:0<br/>N_H_2B:0<br/>fsp2Osp2C5B:3<br/>da_lipo_5B:7<br/>fringNC6B:0<br/>fOringC6B:0</p>      | <p>3 12922</p>  <p>IC50(nM):254.5<br/>fringNplaN4B:0<br/>fsp3Csp2N5B:0<br/>N_H_2B:2<br/>fsp2Osp2C5B:3<br/>da_lipo_5B:13<br/>fringNC6B:0<br/>fOringC6B:0</p> |
| <p>4 209968</p>  <p>IC50(nM):1150.5<br/>fringNplaN4B:0<br/>fsp3Csp2N5B:0<br/>N_H_2B:2<br/>fsp2Osp2C5B:4<br/>da_lipo_5B:11<br/>fringNC6B:0<br/>fOringC6B:1</p> | <p>5 298591</p>  <p>IC50(nM):858<br/>fringNplaN4B:0<br/>fsp3Csp2N5B:0<br/>N_H_2B:3<br/>fsp2Osp2C5B:0<br/>da_lipo_5B:10<br/>fringNC6B:0<br/>fOringC6B:0</p>   | <p>6 341698</p>  <p>IC50(nM):626<br/>fringNplaN4B:0<br/>fsp3Csp2N5B:1<br/>N_H_2B:4<br/>fsp2Osp2C5B:3<br/>da_lipo_5B:13<br/>fringNC6B:2<br/>fOringC6B:1</p>  |
| <p>7 353408</p>  <p>IC50(nM):3000<br/>fringNplaN4B:0<br/>fsp3Csp2N5B:1<br/>N_H_2B:1<br/>fsp2Osp2C5B:0<br/>da_lipo_5B:7<br/>fringNC6B:0<br/>fOringC6B:1</p>  | <p>8 353452</p>  <p>IC50(nM):2100<br/>fringNplaN4B:0<br/>fsp3Csp2N5B:0<br/>N_H_2B:1<br/>fsp2Osp2C5B:0<br/>da_lipo_5B:7<br/>fringNC6B:1<br/>fOringC6B:1</p> | <p>9 361860</p>  <p>IC50(nM):300<br/>fringNplaN4B:0<br/>fsp3Csp2N5B:0<br/>N_H_2B:6<br/>fsp2Osp2C5B:3<br/>da_lipo_5B:7<br/>fringNC6B:1<br/>fOringC6B:1</p> |

|                                                                                                                                                                                                                                                        |                                                                                                                                                                                                                                                  |                                                                                                                                                                                                                                                   |
|--------------------------------------------------------------------------------------------------------------------------------------------------------------------------------------------------------------------------------------------------------|--------------------------------------------------------------------------------------------------------------------------------------------------------------------------------------------------------------------------------------------------|---------------------------------------------------------------------------------------------------------------------------------------------------------------------------------------------------------------------------------------------------|
| <p>10 361877</p> 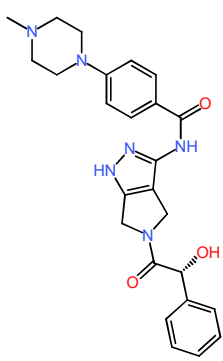 <p>IC50(nM):48<br/>fringNplaN4B:0<br/>fsp3Csp2N5B:0<br/>N_H_2B:6<br/>fsp2Osp2C5B:3<br/>da_lipo_5B:12<br/>fringNC6B:1<br/>fOringC6B:0</p>            | <p>11 361909</p>  <p>IC50(nM):654.5<br/>fringNplaN4B:0<br/>fsp3Csp2N5B:0<br/>N_H_2B:6<br/>fsp2Osp2C5B:3<br/>da_lipo_5B:7<br/>fringNC6B:1<br/>fOringC6B:1</p>   | <p>12 361959</p>  <p>IC50(nM):630<br/>fringNplaN4B:0<br/>fsp3Csp2N5B:0<br/>N_H_2B:6<br/>fsp2Osp2C5B:3<br/>da_lipo_5B:6<br/>fringNC6B:1<br/>fOringC6B:0</p>     |
| <p>13 369152</p>  <p>IC50(nM):1807.273333<br/>fringNplaN4B:0<br/>fsp3Csp2N5B:1<br/>N_H_2B:2<br/>fsp2Osp2C5B:1<br/>da_lipo_5B:0<br/>fringNC6B:1<br/>fOringC6B:0</p>    | <p>14 428508</p>  <p>IC50(nM):2044.43<br/>fringNplaN4B:0<br/>fsp3Csp2N5B:0<br/>N_H_2B:3<br/>fsp2Osp2C5B:0<br/>da_lipo_5B:9<br/>fringNC6B:1<br/>fOringC6B:0</p> | <p>15 429302</p>  <p>IC50(nM):451.5<br/>fringNplaN4B:0<br/>fsp3Csp2N5B:0<br/>N_H_2B:3<br/>fsp2Osp2C5B:4<br/>da_lipo_5B:12<br/>fringNC6B:0<br/>fOringC6B:1</p>  |
| <p>16 436277</p>  <p>IC50(nM):66.73364103<br/>fringNplaN4B:0<br/>fsp3Csp2N5B:1<br/>N_H_2B:6<br/>fsp2Osp2C5B:2<br/>da_lipo_5B:12<br/>fringNC6B:1<br/>fOringC6B:1</p> | <p>17 436278</p>  <p>IC50(nM):89<br/>fringNplaN4B:0<br/>fsp3Csp2N5B:0<br/>N_H_2B:6<br/>fsp2Osp2C5B:3<br/>da_lipo_5B:6<br/>fringNC6B:1<br/>fOringC6B:0</p>    | <p>18 449128</p>  <p>IC50(nM):2100<br/>fringNplaN4B:0<br/>fsp3Csp2N5B:0<br/>N_H_2B:2<br/>fsp2Osp2C5B:4<br/>da_lipo_5B:11<br/>fringNC6B:1<br/>fOringC6B:2</p> |

|                                                                                                                                                                                                                                                               |                                                                                                                                                                                                                                                               |                                                                                                                                                                                                                                                                       |
|---------------------------------------------------------------------------------------------------------------------------------------------------------------------------------------------------------------------------------------------------------------|---------------------------------------------------------------------------------------------------------------------------------------------------------------------------------------------------------------------------------------------------------------|-----------------------------------------------------------------------------------------------------------------------------------------------------------------------------------------------------------------------------------------------------------------------|
| <p>19 459668</p> 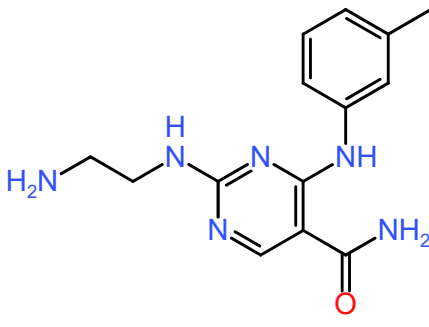 <p>IC50(nM): 1258.9<br/> fringNplaN4B: 1<br/> fsp3Csp2N5B: 0<br/> N_H_2B: 5<br/> fsp2Osp2C5B: 2<br/> da_lipo_5B: 7<br/> fringNC6B: 2<br/> fOringC6B: 2</p> | <p>20 475975</p>  <p>IC50(nM): 2400<br/> fringNplaN4B: 0<br/> fsp3Csp2N5B: 0<br/> N_H_2B: 1<br/> fsp2Osp2C5B: 0<br/> da_lipo_5B: 8<br/> fringNC6B: 0<br/> fOringC6B: 0</p>  | <p>21 489011</p>  <p>IC50(nM): 138.3333333<br/> fringNplaN4B: 0<br/> fsp3Csp2N5B: 0<br/> N_H_2B: 4<br/> fsp2Osp2C5B: 2<br/> da_lipo_5B: 13<br/> fringNC6B: 0<br/> fOringC6B: 1</p> |
| <p>22 520121</p>  <p>IC50(nM): 305<br/> fringNplaN4B: 0<br/> fsp3Csp2N5B: 1<br/> N_H_2B: 5<br/> fsp2Osp2C5B: 0<br/> da_lipo_5B: 5<br/> fringNC6B: 2<br/> fOringC6B: 0</p>    | <p>23 622633</p>  <p>IC50(nM): 26<br/> fringNplaN4B: 0<br/> fsp3Csp2N5B: 0<br/> N_H_2B: 5<br/> fsp2Osp2C5B: 2<br/> da_lipo_5B: 10<br/> fringNC6B: 0<br/> fOringC6B: 1</p>   | <p>24 627855</p>  <p>IC50(nM): 46<br/> fringNplaN4B: 0<br/> fsp3Csp2N5B: 0<br/> N_H_2B: 6<br/> fsp2Osp2C5B: 4<br/> da_lipo_5B: 15<br/> fringNC6B: 0<br/> fOringC6B: 3</p>          |
| <p>25 628348</p>  <p>IC50(nM): 32<br/> fringNplaN4B: 0<br/> fsp3Csp2N5B: 0<br/> N_H_2B: 6<br/> fsp2Osp2C5B: 4<br/> da_lipo_5B: 15<br/> fringNC6B: 0<br/> fOringC6B: 2</p>  | <p>26 628349</p>  <p>IC50(nM): 25<br/> fringNplaN4B: 0<br/> fsp3Csp2N5B: 0<br/> N_H_2B: 6<br/> fsp2Osp2C5B: 4<br/> da_lipo_5B: 15<br/> fringNC6B: 0<br/> fOringC6B: 2</p> | <p>27 628398</p>  <p>IC50(nM): 40<br/> fringNplaN4B: 0<br/> fsp3Csp2N5B: 0<br/> N_H_2B: 5<br/> fsp2Osp2C5B: 4<br/> da_lipo_5B: 15<br/> fringNC6B: 0<br/> fOringC6B: 2</p>        |

|                                                                                                                                                                                                                                               |                                                                                                                                                                                                                                                 |                                                                                                                                                                                                                                                  |
|-----------------------------------------------------------------------------------------------------------------------------------------------------------------------------------------------------------------------------------------------|-------------------------------------------------------------------------------------------------------------------------------------------------------------------------------------------------------------------------------------------------|--------------------------------------------------------------------------------------------------------------------------------------------------------------------------------------------------------------------------------------------------|
| <p>28 628399</p> 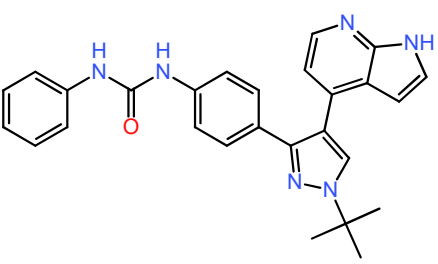 <p>IC50(nM):50<br/>fringNplaN4B:0<br/>fsp3Csp2N5B:0<br/>N_H_2B:5<br/>fsp2Osp2C5B:4<br/>da_lipo_5B:15<br/>fringNC6B:0<br/>fOringC6B:2</p>   | <p>29 628400</p>  <p>IC50(nM):16<br/>fringNplaN4B:0<br/>fsp3Csp2N5B:0<br/>N_H_2B:5<br/>fsp2Osp2C5B:4<br/>da_lipo_5B:15<br/>fringNC6B:0<br/>fOringC6B:2</p>    | <p>30 628510</p>  <p>IC50(nM):64<br/>fringNplaN4B:0<br/>fsp3Csp2N5B:0<br/>N_H_2B:6<br/>fsp2Osp2C5B:6<br/>da_lipo_5B:15<br/>fringNC6B:0<br/>fOringC6B:3</p>    |
| <p>31 628511</p>  <p>IC50(nM):64<br/>fringNplaN4B:0<br/>fsp3Csp2N5B:0<br/>N_H_2B:6<br/>fsp2Osp2C5B:6<br/>da_lipo_5B:16<br/>fringNC6B:0<br/>fOringC6B:3</p>   | <p>32 628679</p>  <p>IC50(nM):58<br/>fringNplaN4B:0<br/>fsp3Csp2N5B:0<br/>N_H_2B:6<br/>fsp2Osp2C5B:4<br/>da_lipo_5B:15<br/>fringNC6B:0<br/>fOringC6B:2</p>    | <p>33 700097</p>  <p>IC50(nM):660.25<br/>fringNplaN4B:0<br/>fsp3Csp2N5B:0<br/>N_H_2B:6<br/>fsp2Osp2C5B:0<br/>da_lipo_5B:7<br/>fringNC6B:1<br/>fOringC6B:0</p> |
| <p>34 702437</p>  <p>IC50(nM):12<br/>fringNplaN4B:0<br/>fsp3Csp2N5B:0<br/>N_H_2B:5<br/>fsp2Osp2C5B:4<br/>da_lipo_5B:17<br/>fringNC6B:1<br/>fOringC6B:2</p> | <p>35 1037720</p>  <p>IC50(nM):54<br/>fringNplaN4B:0<br/>fsp3Csp2N5B:1<br/>N_H_2B:6<br/>fsp2Osp2C5B:2<br/>da_lipo_5B:13<br/>fringNC6B:1<br/>fOringC6B:1</p> | <p>36 1062266</p>  <p>IC50(nM):19<br/>fringNplaN4B:0<br/>fsp3Csp2N5B:1<br/>N_H_2B:6<br/>fsp2Osp2C5B:0<br/>da_lipo_5B:6<br/>fringNC6B:0<br/>fOringC6B:1</p>  |

|                                                                                                                                                                                                                                                               |                                                                                                                                                                                                                                                                  |                                                                                                                                                                                                                                                                   |
|---------------------------------------------------------------------------------------------------------------------------------------------------------------------------------------------------------------------------------------------------------------|------------------------------------------------------------------------------------------------------------------------------------------------------------------------------------------------------------------------------------------------------------------|-------------------------------------------------------------------------------------------------------------------------------------------------------------------------------------------------------------------------------------------------------------------|
| <p>37 1062267</p> 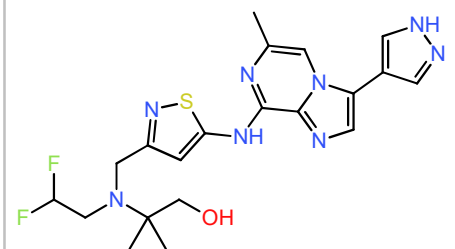 <p>IC50(nM): 159.5<br/> fringNplaN4B: 0<br/> fsp3Csp2N5B: 1<br/> N_H_2B: 6<br/> fsp2Osp2C5B: 0<br/> da_lipo_5B: 6<br/> fringNC6B: 0<br/> fOringC6B: 1</p> | <p>38 1062268</p>  <p>IC50(nM): 105.5<br/> fringNplaN4B: 0<br/> fsp3Csp2N5B: 1<br/> N_H_2B: 6<br/> fsp2Osp2C5B: 0<br/> da_lipo_5B: 6<br/> fringNC6B: 0<br/> fOringC6B: 1</p>   | <p>39 1062269</p>  <p>IC50(nM): 27.1665<br/> fringNplaN4B: 0<br/> fsp3Csp2N5B: 1<br/> N_H_2B: 6<br/> fsp2Osp2C5B: 0<br/> da_lipo_5B: 3<br/> fringNC6B: 0<br/> fOringC6B: 0</p> |
| <p>40 1062270</p>  <p>IC50(nM): 49.5<br/> fringNplaN4B: 0<br/> fsp3Csp2N5B: 1<br/> N_H_2B: 6<br/> fsp2Osp2C5B: 0<br/> da_lipo_5B: 3<br/> fringNC6B: 0<br/> fOringC6B: 0</p>  | <p>41 1062271</p>  <p>IC50(nM): 43.5<br/> fringNplaN4B: 0<br/> fsp3Csp2N5B: 1<br/> N_H_2B: 6<br/> fsp2Osp2C5B: 0<br/> da_lipo_5B: 3<br/> fringNC6B: 0<br/> fOringC6B: 0</p>    | <p>42 1062272</p>  <p>IC50(nM): 103<br/> fringNplaN4B: 0<br/> fsp3Csp2N5B: 1<br/> N_H_2B: 6<br/> fsp2Osp2C5B: 0<br/> da_lipo_5B: 3<br/> fringNC6B: 0<br/> fOringC6B: 0</p>     |
| <p>43 1062273</p>  <p>IC50(nM): 46<br/> fringNplaN4B: 0<br/> fsp3Csp2N5B: 1<br/> N_H_2B: 6<br/> fsp2Osp2C5B: 0<br/> da_lipo_5B: 3<br/> fringNC6B: 0<br/> fOringC6B: 0</p>  | <p>44 1062274</p>  <p>IC50(nM): 115.5<br/> fringNplaN4B: 0<br/> fsp3Csp2N5B: 1<br/> N_H_2B: 6<br/> fsp2Osp2C5B: 0<br/> da_lipo_5B: 3<br/> fringNC6B: 0<br/> fOringC6B: 0</p> | <p>45 1062275</p>  <p>IC50(nM): 50.5<br/> fringNplaN4B: 0<br/> fsp3Csp2N5B: 1<br/> N_H_2B: 6<br/> fsp2Osp2C5B: 0<br/> da_lipo_5B: 3<br/> fringNC6B: 0<br/> fOringC6B: 0</p>  |

|                                                                                                                                                                                                                                                       |                                                                                                                                                                                                                                                           |                                                                                                                                                                                                                                                            |
|-------------------------------------------------------------------------------------------------------------------------------------------------------------------------------------------------------------------------------------------------------|-----------------------------------------------------------------------------------------------------------------------------------------------------------------------------------------------------------------------------------------------------------|------------------------------------------------------------------------------------------------------------------------------------------------------------------------------------------------------------------------------------------------------------|
| <p>46 1062276</p> 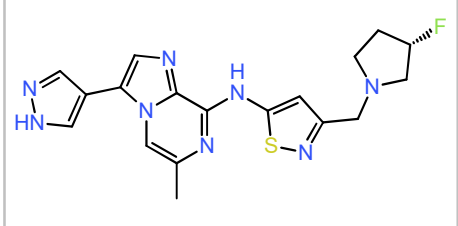 <p>IC50(nM):50.25<br/> fringNplaN4B:0<br/> fsp3Csp2N5B:1<br/> N_H_2B:6<br/> fsp2Osp2C5B:0<br/> da_lipo_5B:3<br/> fringNC6B:0<br/> fOringC6B:0</p> | <p>47 1062278</p>  <p>IC50(nM):52<br/> fringNplaN4B:0<br/> fsp3Csp2N5B:1<br/> N_H_2B:6<br/> fsp2Osp2C5B:0<br/> da_lipo_5B:3<br/> fringNC6B:0<br/> fOringC6B:0</p>       | <p>48 1062279</p>  <p>IC50(nM):31.5<br/> fringNplaN4B:0<br/> fsp3Csp2N5B:1<br/> N_H_2B:6<br/> fsp2Osp2C5B:0<br/> da_lipo_5B:3<br/> fringNC6B:0<br/> fOringC6B:0</p>     |
| <p>49 1062280</p>  <p>IC50(nM):102<br/> fringNplaN4B:0<br/> fsp3Csp2N5B:1<br/> N_H_2B:6<br/> fsp2Osp2C5B:0<br/> da_lipo_5B:7<br/> fringNC6B:0<br/> fOringC6B:0</p>   | <p>50 1062281</p>  <p>IC50(nM):44.5<br/> fringNplaN4B:0<br/> fsp3Csp2N5B:1<br/> N_H_2B:6<br/> fsp2Osp2C5B:0<br/> da_lipo_5B:7<br/> fringNC6B:0<br/> fOringC6B:0</p>     | <p>51 1062282</p>  <p>IC50(nM):38<br/> fringNplaN4B:0<br/> fsp3Csp2N5B:1<br/> N_H_2B:6<br/> fsp2Osp2C5B:0<br/> da_lipo_5B:8<br/> fringNC6B:1<br/> fOringC6B:0</p>       |
| <p>52 1062283</p>  <p>IC50(nM):32<br/> fringNplaN4B:0<br/> fsp3Csp2N5B:1<br/> N_H_2B:6<br/> fsp2Osp2C5B:0<br/> da_lipo_5B:10<br/> fringNC6B:1<br/> fOringC6B:0</p> | <p>53 1172566</p>  <p>IC50(nM):225.5<br/> fringNplaN4B:0<br/> fsp3Csp2N5B:0<br/> N_H_2B:5<br/> fsp2Osp2C5B:2<br/> da_lipo_5B:13<br/> fringNC6B:1<br/> fOringC6B:1</p> | <p>54 1172572</p>  <p>IC50(nM):164.5<br/> fringNplaN4B:0<br/> fsp3Csp2N5B:0<br/> N_H_2B:6<br/> fsp2Osp2C5B:2<br/> da_lipo_5B:12<br/> fringNC6B:1<br/> fOringC6B:1</p> |

|                                                                                                                                                                                                                                                        |                                                                                                                                                                                                                                                           |                                                                                                                                                                                                                                                              |
|--------------------------------------------------------------------------------------------------------------------------------------------------------------------------------------------------------------------------------------------------------|-----------------------------------------------------------------------------------------------------------------------------------------------------------------------------------------------------------------------------------------------------------|--------------------------------------------------------------------------------------------------------------------------------------------------------------------------------------------------------------------------------------------------------------|
| <p>55 1172573</p> 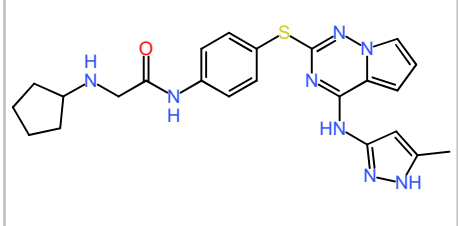 <p>IC50(nM):348.5<br/> fringNplaN4B:0<br/> fsp3Csp2N5B:0<br/> N_H_2B:6<br/> fsp2Osp2C5B:2<br/> da_lipo_5B:14<br/> fringNC6B:1<br/> fOringC6B:3</p> | <p>56 1172575</p>  <p>IC50(nM):150.5<br/> fringNplaN4B:0<br/> fsp3Csp2N5B:0<br/> N_H_2B:6<br/> fsp2Osp2C5B:2<br/> da_lipo_5B:10<br/> fringNC6B:1<br/> fOringC6B:1</p>   | <p>57 1172576</p>  <p>IC50(nM):75<br/> fringNplaN4B:0<br/> fsp3Csp2N5B:0<br/> N_H_2B:6<br/> fsp2Osp2C5B:2<br/> da_lipo_5B:12<br/> fringNC6B:0<br/> fOringC6B:1</p>        |
| <p>58 1172722</p>  <p>IC50(nM):50<br/> fringNplaN4B:0<br/> fsp3Csp2N5B:0<br/> N_H_2B:6<br/> fsp2Osp2C5B:2<br/> da_lipo_5B:13<br/> fringNC6B:0<br/> fOringC6B:1</p>    | <p>59 1172723</p>  <p>IC50(nM):16<br/> fringNplaN4B:0<br/> fsp3Csp2N5B:0<br/> N_H_2B:6<br/> fsp2Osp2C5B:2<br/> da_lipo_5B:13<br/> fringNC6B:0<br/> fOringC6B:1</p>      | <p>60 1172724</p>  <p>IC50(nM):97<br/> fringNplaN4B:0<br/> fsp3Csp2N5B:0<br/> N_H_2B:6<br/> fsp2Osp2C5B:2<br/> da_lipo_5B:13<br/> fringNC6B:0<br/> fOringC6B:1</p>        |
| <p>61 1172731</p>  <p>IC50(nM):24<br/> fringNplaN4B:0<br/> fsp3Csp2N5B:0<br/> N_H_2B:6<br/> fsp2Osp2C5B:2<br/> da_lipo_5B:12<br/> fringNC6B:0<br/> fOringC6B:1</p>  | <p>62 1178804</p>  <p>IC50(nM):1995.3<br/> fringNplaN4B:1<br/> fsp3Csp2N5B:0<br/> N_H_2B:4<br/> fsp2Osp2C5B:2<br/> da_lipo_5B:7<br/> fringNC6B:2<br/> fOringC6B:2</p> | <p>63 1178805</p>  <p>IC50(nM):1780.205<br/> fringNplaN4B:1<br/> fsp3Csp2N5B:0<br/> N_H_2B:5<br/> fsp2Osp2C5B:2<br/> da_lipo_5B:9<br/> fringNC6B:2<br/> fOringC6B:2</p> |

|                                                                                                                                                                                                                                                                        |                                                                                                                                                                                                                                                                         |                                                                                                                                                                                                                                                                  |
|------------------------------------------------------------------------------------------------------------------------------------------------------------------------------------------------------------------------------------------------------------------------|-------------------------------------------------------------------------------------------------------------------------------------------------------------------------------------------------------------------------------------------------------------------------|------------------------------------------------------------------------------------------------------------------------------------------------------------------------------------------------------------------------------------------------------------------|
| <p>64 1179108</p> 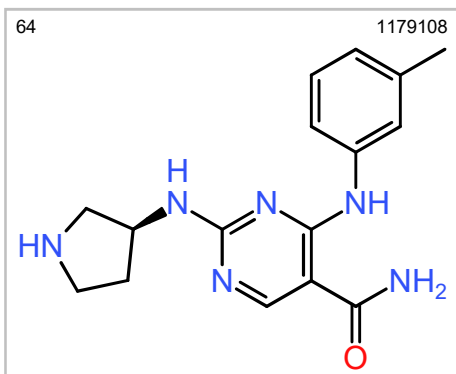 <p>IC50(nM): 794.33<br/> fringNplaN4B: 1<br/> fsp3Csp2N5B: 0<br/> N_H_2B: 5<br/> fsp2Osp2C5B: 2<br/> da_lipo_5B: 8<br/> fringNC6B: 2<br/> fOringC6B: 2</p>          | <p>65 1179115</p>  <p>IC50(nM): 1995.3<br/> fringNplaN4B: 1<br/> fsp3Csp2N5B: 0<br/> N_H_2B: 5<br/> fsp2Osp2C5B: 2<br/> da_lipo_5B: 11<br/> fringNC6B: 3<br/> fOringC6B: 2</p>         | <p>66 1179117</p>  <p>IC50(nM): 3981.1<br/> fringNplaN4B: 1<br/> fsp3Csp2N5B: 0<br/> N_H_2B: 5<br/> fsp2Osp2C5B: 2<br/> da_lipo_5B: 8<br/> fringNC6B: 3<br/> fOringC6B: 2</p>  |
| <p>67 1179118</p>  <p>IC50(nM): 1995.3<br/> fringNplaN4B: 1<br/> fsp3Csp2N5B: 0<br/> N_H_2B: 5<br/> fsp2Osp2C5B: 2<br/> da_lipo_5B: 7<br/> fringNC6B: 2<br/> fOringC6B: 2</p>         | <p>68 1179120</p>  <p>IC50(nM): 1258.9<br/> fringNplaN4B: 1<br/> fsp3Csp2N5B: 0<br/> N_H_2B: 5<br/> fsp2Osp2C5B: 2<br/> da_lipo_5B: 13<br/> fringNC6B: 3<br/> fOringC6B: 2</p>        | <p>69 1285567</p>  <p>IC50(nM): 97<br/> fringNplaN4B: 0<br/> fsp3Csp2N5B: 0<br/> N_H_2B: 5<br/> fsp2Osp2C5B: 4<br/> da_lipo_5B: 15<br/> fringNC6B: 0<br/> fOringC6B: 3</p>    |
| <p>70 1288407</p>  <p>IC50(nM): 24.33166667<br/> fringNplaN4B: 0<br/> fsp3Csp2N5B: 0<br/> N_H_2B: 6<br/> fsp2Osp2C5B: 4<br/> da_lipo_5B: 18<br/> fringNC6B: 2<br/> fOringC6B: 2</p> | <p>71 1290393</p>  <p>IC50(nM): 15.81333333<br/> fringNplaN4B: 0<br/> fsp3Csp2N5B: 0<br/> N_H_2B: 6<br/> fsp2Osp2C5B: 4<br/> da_lipo_5B: 18<br/> fringNC6B: 2<br/> fOringC6B: 2</p> | <p>72 1291608</p>  <p>IC50(nM): 7.5<br/> fringNplaN4B: 0<br/> fsp3Csp2N5B: 0<br/> N_H_2B: 6<br/> fsp2Osp2C5B: 4<br/> da_lipo_5B: 18<br/> fringNC6B: 2<br/> fOringC6B: 2</p> |



|                                                                                                                                                                                                                                                               |                                                                                                                                                                                                                                                                |                                                                                                                                                                                                                                                                 |
|---------------------------------------------------------------------------------------------------------------------------------------------------------------------------------------------------------------------------------------------------------------|----------------------------------------------------------------------------------------------------------------------------------------------------------------------------------------------------------------------------------------------------------------|-----------------------------------------------------------------------------------------------------------------------------------------------------------------------------------------------------------------------------------------------------------------|
| <p>73 1301174</p> 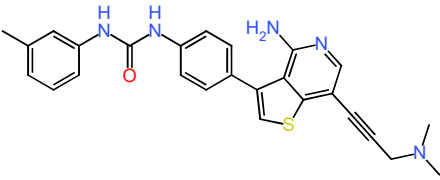 <p>IC50(nM): 76<br/> fringNplaN4B: 0<br/> fsp3Csp2N5B: 1<br/> N_H_2B: 5<br/> fsp2Osp2C5B: 4<br/> da_lipo_5B: 18<br/> fringNC6B: 2<br/> fOringC6B: 2</p>   | <p>74 1303757</p>  <p>IC50(nM): 57<br/> fringNplaN4B: 0<br/> fsp3Csp2N5B: 0<br/> N_H_2B: 6<br/> fsp2Osp2C5B: 4<br/> da_lipo_5B: 18<br/> fringNC6B: 2<br/> fOringC6B: 2</p>   | <p>75 1307949</p>  <p>IC50(nM): 50<br/> fringNplaN4B: 0<br/> fsp3Csp2N5B: 0<br/> N_H_2B: 4<br/> fsp2Osp2C5B: 5<br/> da_lipo_5B: 17<br/> fringNC6B: 1<br/> fOringC6B: 1</p>   |
| <p>76 1315232</p>  <p>IC50(nM): 17.5<br/> fringNplaN4B: 0<br/> fsp3Csp2N5B: 0<br/> N_H_2B: 6<br/> fsp2Osp2C5B: 4<br/> da_lipo_5B: 18<br/> fringNC6B: 2<br/> fOringC6B: 2</p> | <p>77 1332987</p>  <p>IC50(nM): 38<br/> fringNplaN4B: 0<br/> fsp3Csp2N5B: 1<br/> N_H_2B: 4<br/> fsp2Osp2C5B: 0<br/> da_lipo_5B: 12<br/> fringNC6B: 1<br/> fOringC6B: 0</p>   | <p>78 1332990</p>  <p>IC50(nM): 93<br/> fringNplaN4B: 0<br/> fsp3Csp2N5B: 1<br/> N_H_2B: 4<br/> fsp2Osp2C5B: 0<br/> da_lipo_5B: 13<br/> fringNC6B: 1<br/> fOringC6B: 0</p>   |
| <p>79 1337477</p>  <p>IC50(nM): 363<br/> fringNplaN4B: 0<br/> fsp3Csp2N5B: 1<br/> N_H_2B: 6<br/> fsp2Osp2C5B: 0<br/> da_lipo_5B: 3<br/> fringNC6B: 0<br/> fOringC6B: 1</p> | <p>80 1337478</p>  <p>IC50(nM): 146<br/> fringNplaN4B: 0<br/> fsp3Csp2N5B: 1<br/> N_H_2B: 6<br/> fsp2Osp2C5B: 0<br/> da_lipo_5B: 3<br/> fringNC6B: 0<br/> fOringC6B: 1</p> | <p>81 1337479</p>  <p>IC50(nM): 514<br/> fringNplaN4B: 0<br/> fsp3Csp2N5B: 1<br/> N_H_2B: 7<br/> fsp2Osp2C5B: 2<br/> da_lipo_5B: 3<br/> fringNC6B: 0<br/> fOringC6B: 1</p> |

|                                                                                                                                                                                                                                                                |                                                                                                                                                                                                                                                                 |                                                                                                                                                                                                                                                                  |
|----------------------------------------------------------------------------------------------------------------------------------------------------------------------------------------------------------------------------------------------------------------|-----------------------------------------------------------------------------------------------------------------------------------------------------------------------------------------------------------------------------------------------------------------|------------------------------------------------------------------------------------------------------------------------------------------------------------------------------------------------------------------------------------------------------------------|
| <p>82 1337480</p> 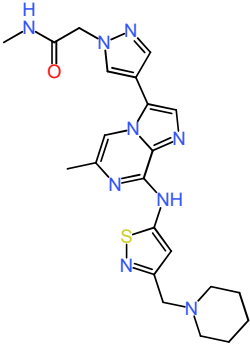 <p>IC50(nM): 193<br/> fringNplaN4B: 0<br/> fsp3Csp2N5B: 1<br/> N_H_2B: 7<br/> fsp2Osp2C5B: 2<br/> da_lipo_5B: 3<br/> fringNC6B: 0<br/> fOringC6B: 1</p>    | <p>83 1338596</p>  <p>IC50(nM): 83.5<br/> fringNplaN4B: 0<br/> fsp3Csp2N5B: 0<br/> N_H_2B: 5<br/> fsp2Osp2C5B: 6<br/> da_lipo_5B: 19<br/> fringNC6B: 2<br/> fOringC6B: 3</p>   | <p>84 1338598</p>  <p>IC50(nM): 200<br/> fringNplaN4B: 0<br/> fsp3Csp2N5B: 0<br/> N_H_2B: 4<br/> fsp2Osp2C5B: 4<br/> da_lipo_5B: 18<br/> fringNC6B: 2<br/> fOringC6B: 5</p>   |
| <p>85 1338599</p>  <p>IC50(nM): 239.5<br/> fringNplaN4B: 0<br/> fsp3Csp2N5B: 0<br/> N_H_2B: 4<br/> fsp2Osp2C5B: 4<br/> da_lipo_5B: 18<br/> fringNC6B: 2<br/> fOringC6B: 2</p> | <p>86 1338600</p>  <p>IC50(nM): 228.5<br/> fringNplaN4B: 0<br/> fsp3Csp2N5B: 0<br/> N_H_2B: 5<br/> fsp2Osp2C5B: 4<br/> da_lipo_5B: 19<br/> fringNC6B: 2<br/> fOringC6B: 2</p> | <p>87 1338601</p>  <p>IC50(nM): 113.5<br/> fringNplaN4B: 0<br/> fsp3Csp2N5B: 0<br/> N_H_2B: 6<br/> fsp2Osp2C5B: 4<br/> da_lipo_5B: 18<br/> fringNC6B: 2<br/> fOringC6B: 2</p> |
| <p>88 1338603</p>  <p>IC50(nM): 7.5<br/> fringNplaN4B: 0<br/> fsp3Csp2N5B: 0<br/> N_H_2B: 6<br/> fsp2Osp2C5B: 4<br/> da_lipo_5B: 17<br/> fringNC6B: 2<br/> fOringC6B: 2</p> | <p>89 1338604</p>  <p>IC50(nM): 24<br/> fringNplaN4B: 0<br/> fsp3Csp2N5B: 0<br/> N_H_2B: 6<br/> fsp2Osp2C5B: 4<br/> da_lipo_5B: 18<br/> fringNC6B: 2<br/> fOringC6B: 2</p>  | <p>90 1338605</p>  <p>IC50(nM): 44<br/> fringNplaN4B: 0<br/> fsp3Csp2N5B: 0<br/> N_H_2B: 6<br/> fsp2Osp2C5B: 4<br/> da_lipo_5B: 18<br/> fringNC6B: 2<br/> fOringC6B: 2</p>  |

|                                                                                                                                                                                                                                                                |                                                                                                                                                                                                                                                                |                                                                                                                                                                                                                                                                 |
|----------------------------------------------------------------------------------------------------------------------------------------------------------------------------------------------------------------------------------------------------------------|----------------------------------------------------------------------------------------------------------------------------------------------------------------------------------------------------------------------------------------------------------------|-----------------------------------------------------------------------------------------------------------------------------------------------------------------------------------------------------------------------------------------------------------------|
| <p>91 1338606</p> 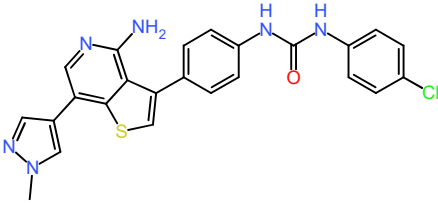 <p>IC50(nM): 37.5<br/> fringNplaN4B: 0<br/> fsp3Csp2N5B: 0<br/> N_H_2B: 6<br/> fsp2Osp2C5B: 4<br/> da_lipo_5B: 18<br/> fringNC6B: 2<br/> fOringC6B: 2</p>  | <p>92 1338607</p>  <p>IC50(nM): 76<br/> fringNplaN4B: 0<br/> fsp3Csp2N5B: 0<br/> N_H_2B: 6<br/> fsp2Osp2C5B: 4<br/> da_lipo_5B: 16<br/> fringNC6B: 2<br/> fOringC6B: 1</p>   | <p>93 1338608</p>  <p>IC50(nM): 85.5<br/> fringNplaN4B: 0<br/> fsp3Csp2N5B: 0<br/> N_H_2B: 6<br/> fsp2Osp2C5B: 4<br/> da_lipo_5B: 16<br/> fringNC6B: 2<br/> fOringC6B: 1</p> |
| <p>94 1356835</p>  <p>IC50(nM): 127<br/> fringNplaN4B: 0<br/> fsp3Csp2N5B: 0<br/> N_H_2B: 4<br/> fsp2Osp2C5B: 3<br/> da_lipo_5B: 14<br/> fringNC6B: 1<br/> fOringC6B: 1</p>   | <p>95 1356836</p>  <p>IC50(nM): 480<br/> fringNplaN4B: 0<br/> fsp3Csp2N5B: 0<br/> N_H_2B: 4<br/> fsp2Osp2C5B: 3<br/> da_lipo_5B: 15<br/> fringNC6B: 1<br/> fOringC6B: 1</p>  | <p>96 1356837</p>  <p>IC50(nM): 82<br/> fringNplaN4B: 0<br/> fsp3Csp2N5B: 0<br/> N_H_2B: 4<br/> fsp2Osp2C5B: 3<br/> da_lipo_5B: 15<br/> fringNC6B: 1<br/> fOringC6B: 1</p>   |
| <p>97 1356838</p>  <p>IC50(nM): 140<br/> fringNplaN4B: 0<br/> fsp3Csp2N5B: 0<br/> N_H_2B: 4<br/> fsp2Osp2C5B: 3<br/> da_lipo_5B: 15<br/> fringNC6B: 1<br/> fOringC6B: 1</p> | <p>98 1356839</p>  <p>IC50(nM): 18<br/> fringNplaN4B: 0<br/> fsp3Csp2N5B: 0<br/> N_H_2B: 4<br/> fsp2Osp2C5B: 5<br/> da_lipo_5B: 15<br/> fringNC6B: 1<br/> fOringC6B: 1</p> | <p>99 1356840</p>  <p>IC50(nM): 41<br/> fringNplaN4B: 0<br/> fsp3Csp2N5B: 0<br/> N_H_2B: 4<br/> fsp2Osp2C5B: 5<br/> da_lipo_5B: 16<br/> fringNC6B: 1<br/> fOringC6B: 1</p> |

|                                                                                                                                                                                                                                                 |                                                                                                                                                                                                                                                  |                                                                                                                                                                                                                                                   |
|-------------------------------------------------------------------------------------------------------------------------------------------------------------------------------------------------------------------------------------------------|--------------------------------------------------------------------------------------------------------------------------------------------------------------------------------------------------------------------------------------------------|---------------------------------------------------------------------------------------------------------------------------------------------------------------------------------------------------------------------------------------------------|
| <p>100 1356843</p> 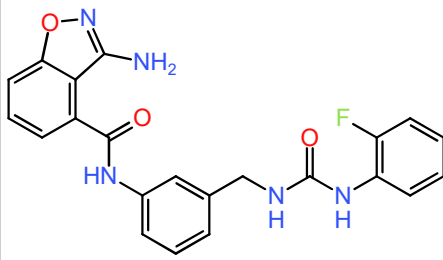 <p>IC50(nM):55<br/>fringNplaN4B:0<br/>fsp3Csp2N5B:0<br/>N_H_2B:4<br/>fsp2Osp2C5B:5<br/>da_lipo_5B:16<br/>fringNC6B:1<br/>fOringC6B:1</p>   | <p>101 1356844</p>  <p>IC50(nM):59<br/>fringNplaN4B:0<br/>fsp3Csp2N5B:0<br/>N_H_2B:4<br/>fsp2Osp2C5B:5<br/>da_lipo_5B:16<br/>fringNC6B:1<br/>fOringC6B:1</p>   | <p>102 1356845</p>  <p>IC50(nM):12<br/>fringNplaN4B:0<br/>fsp3Csp2N5B:0<br/>N_H_2B:4<br/>fsp2Osp2C5B:5<br/>da_lipo_5B:16<br/>fringNC6B:1<br/>fOringC6B:1</p>   |
| <p>103 1356846</p>  <p>IC50(nM):7<br/>fringNplaN4B:0<br/>fsp3Csp2N5B:0<br/>N_H_2B:4<br/>fsp2Osp2C5B:5<br/>da_lipo_5B:17<br/>fringNC6B:1<br/>fOringC6B:1</p>    | <p>104 1356847</p>  <p>IC50(nM):525<br/>fringNplaN4B:0<br/>fsp3Csp2N5B:0<br/>N_H_2B:3<br/>fsp2Osp2C5B:3<br/>da_lipo_5B:10<br/>fringNC6B:1<br/>fOringC6B:1</p>  | <p>105 1356849</p>  <p>IC50(nM):450<br/>fringNplaN4B:0<br/>fsp3Csp2N5B:0<br/>N_H_2B:3<br/>fsp2Osp2C5B:4<br/>da_lipo_5B:17<br/>fringNC6B:1<br/>fOringC6B:1</p>  |
| <p>106 1356851</p>  <p>IC50(nM):12<br/>fringNplaN4B:0<br/>fsp3Csp2N5B:0<br/>N_H_2B:4<br/>fsp2Osp2C5B:5<br/>da_lipo_5B:17<br/>fringNC6B:1<br/>fOringC6B:1</p> | <p>107 1356852</p>  <p>IC50(nM):36<br/>fringNplaN4B:0<br/>fsp3Csp2N5B:0<br/>N_H_2B:4<br/>fsp2Osp2C5B:5<br/>da_lipo_5B:18<br/>fringNC6B:1<br/>fOringC6B:1</p> | <p>108 1356853</p>  <p>IC50(nM):18<br/>fringNplaN4B:0<br/>fsp3Csp2N5B:0<br/>N_H_2B:6<br/>fsp2Osp2C5B:5<br/>da_lipo_5B:16<br/>fringNC6B:1<br/>fOringC6B:1</p> |

|                                                                                                                                                                                                                                                 |                                                                                                                                                                                                                                                  |                                                                                                                                                                                                                                                  |
|-------------------------------------------------------------------------------------------------------------------------------------------------------------------------------------------------------------------------------------------------|--------------------------------------------------------------------------------------------------------------------------------------------------------------------------------------------------------------------------------------------------|--------------------------------------------------------------------------------------------------------------------------------------------------------------------------------------------------------------------------------------------------|
| <p>109 1356854</p> 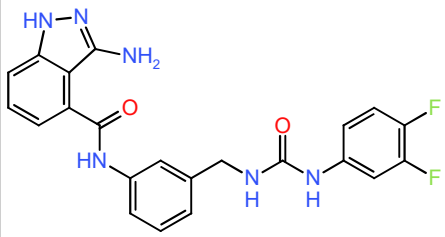 <p>IC50(nM):28<br/>fringNplaN4B:0<br/>fsp3Csp2N5B:0<br/>N_H_2B:6<br/>fsp2Osp2C5B:5<br/>da_lipo_5B:17<br/>fringNC6B:1<br/>fOringC6B:1</p>   | <p>110 1356856</p>  <p>IC50(nM):172<br/>fringNplaN4B:0<br/>fsp3Csp2N5B:0<br/>N_H_2B:5<br/>fsp2Osp2C5B:5<br/>da_lipo_5B:16<br/>fringNC6B:1<br/>fOringC6B:1</p>  | <p>111 1356858</p>  <p>IC50(nM):24<br/>fringNplaN4B:1<br/>fsp3Csp2N5B:0<br/>N_H_2B:7<br/>fsp2Osp2C5B:4<br/>da_lipo_5B:13<br/>fringNC6B:2<br/>fOringC6B:2</p>  |
| <p>112 1356860</p>  <p>IC50(nM):4<br/>fringNplaN4B:1<br/>fsp3Csp2N5B:0<br/>N_H_2B:7<br/>fsp2Osp2C5B:4<br/>da_lipo_5B:13<br/>fringNC6B:2<br/>fOringC6B:2</p>    | <p>113 1356861</p>  <p>IC50(nM):10<br/>fringNplaN4B:1<br/>fsp3Csp2N5B:0<br/>N_H_2B:7<br/>fsp2Osp2C5B:4<br/>da_lipo_5B:13<br/>fringNC6B:2<br/>fOringC6B:2</p>   | <p>114 1356862</p>  <p>IC50(nM):38<br/>fringNplaN4B:1<br/>fsp3Csp2N5B:0<br/>N_H_2B:7<br/>fsp2Osp2C5B:2<br/>da_lipo_5B:12<br/>fringNC6B:2<br/>fOringC6B:2</p>  |
| <p>115 1356863</p>  <p>IC50(nM):36<br/>fringNplaN4B:1<br/>fsp3Csp2N5B:0<br/>N_H_2B:7<br/>fsp2Osp2C5B:2<br/>da_lipo_5B:12<br/>fringNC6B:2<br/>fOringC6B:2</p> | <p>116 1356864</p>  <p>IC50(nM):33<br/>fringNplaN4B:1<br/>fsp3Csp2N5B:0<br/>N_H_2B:7<br/>fsp2Osp2C5B:0<br/>da_lipo_5B:10<br/>fringNC6B:2<br/>fOringC6B:1</p> | <p>117 1361351</p>  <p>IC50(nM):29<br/>fringNplaN4B:0<br/>fsp3Csp2N5B:1<br/>N_H_2B:6<br/>fsp2Osp2C5B:2<br/>da_lipo_5B:8<br/>fringNC6B:1<br/>fOringC6B:1</p> |

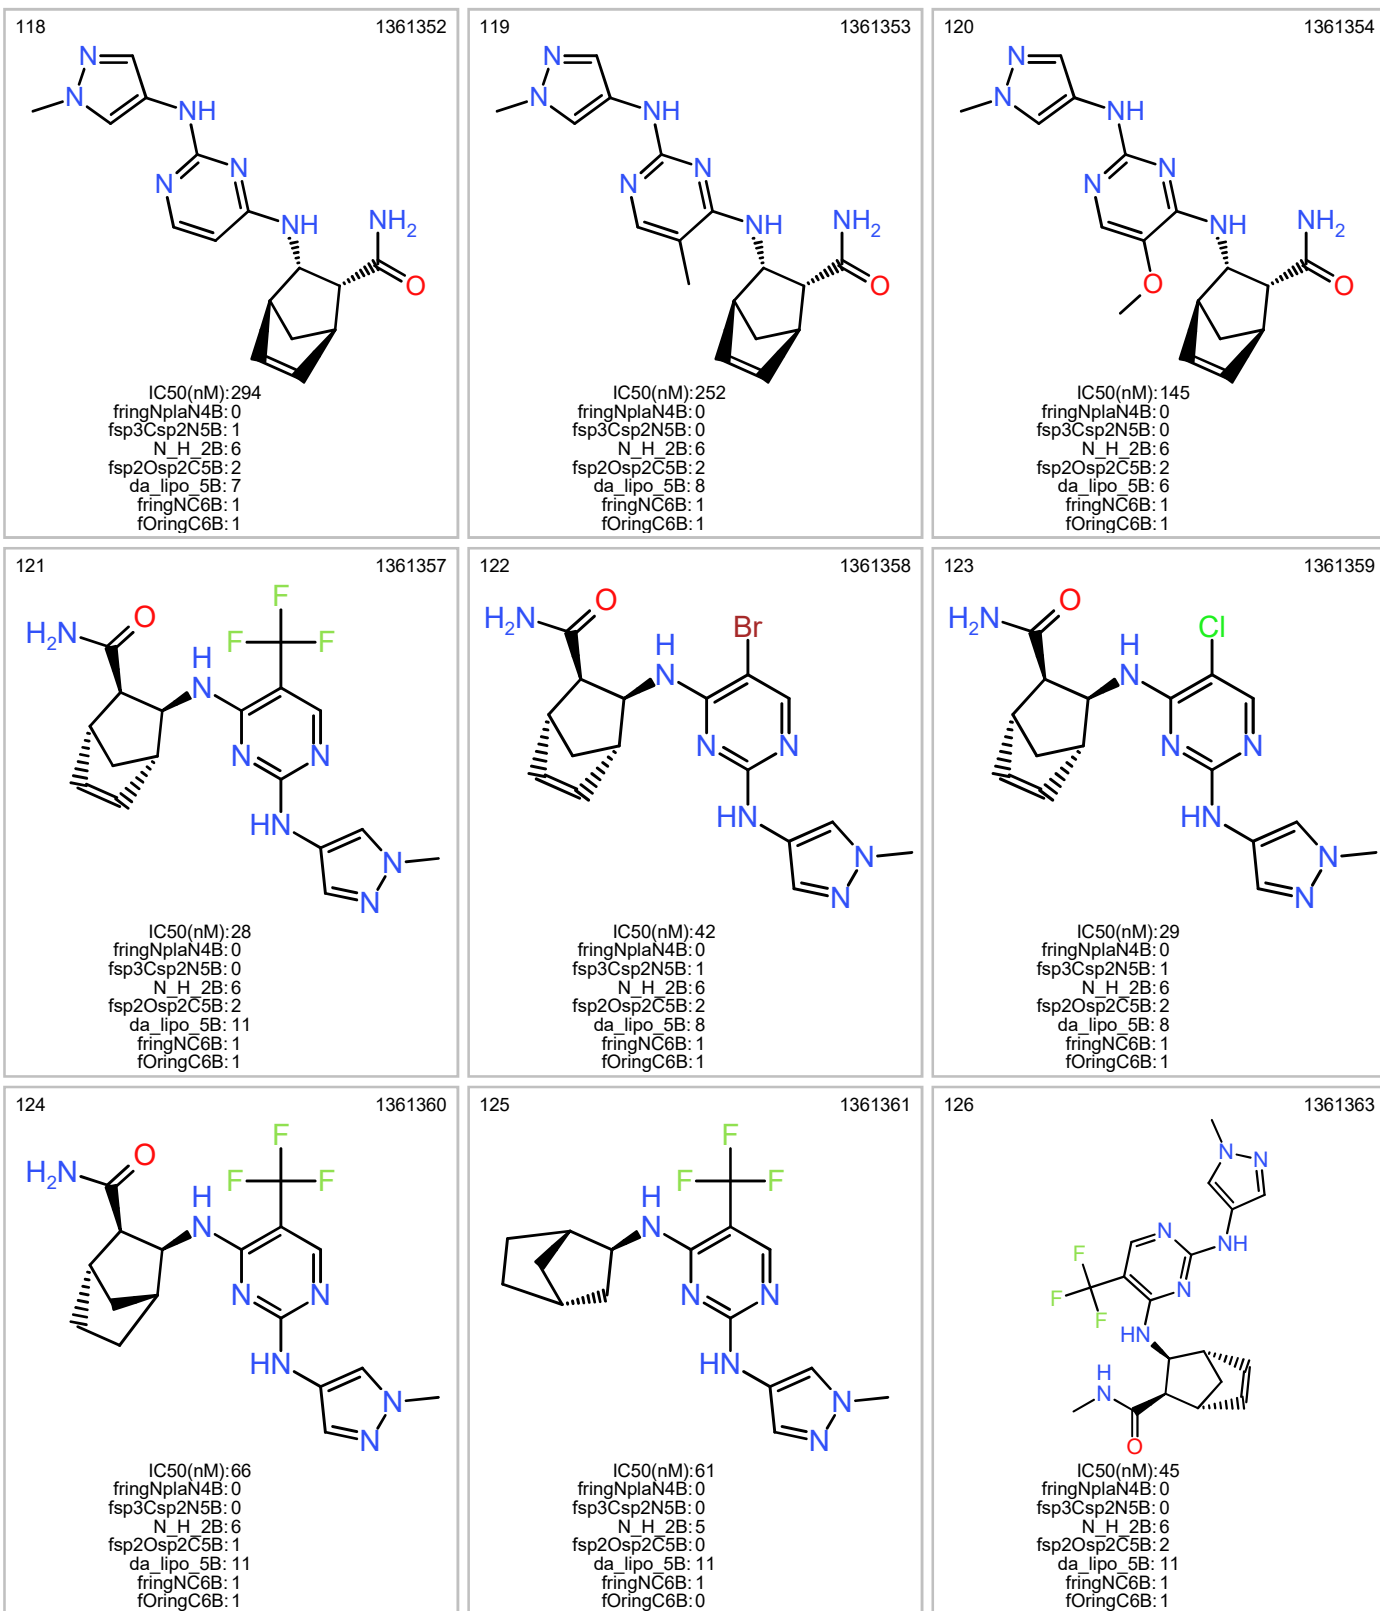

|                                                                                                                                                                                                                                                |                                                                                                                                                                                                                                                 |                                                                                                                                                                                                                                                  |
|------------------------------------------------------------------------------------------------------------------------------------------------------------------------------------------------------------------------------------------------|-------------------------------------------------------------------------------------------------------------------------------------------------------------------------------------------------------------------------------------------------|--------------------------------------------------------------------------------------------------------------------------------------------------------------------------------------------------------------------------------------------------|
| <p>127 1361364</p> 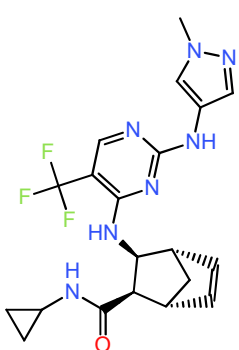 <p>IC50(nM):51<br/>fringNplaN4B:0<br/>fsp3Csp2N5B:0<br/>N_H_2B:6<br/>fsp2Osp2C5B:2<br/>da_lipo_5B:13<br/>fringNC6B:1<br/>fOringC6B:1</p>  | <p>128 1361365</p>  <p>IC50(nM):99<br/>fringNplaN4B:0<br/>fsp3Csp2N5B:0<br/>N_H_2B:6<br/>fsp2Osp2C5B:2<br/>da_lipo_5B:11<br/>fringNC6B:1<br/>fOringC6B:1</p>   | <p>129 1361368</p>  <p>IC50(nM):31<br/>fringNplaN4B:0<br/>fsp3Csp2N5B:1<br/>N_H_2B:6<br/>fsp2Osp2C5B:1<br/>da_lipo_5B:8<br/>fringNC6B:1<br/>fOringC6B:1</p>   |
| <p>130 1361369</p>  <p>IC50(nM):118<br/>fringNplaN4B:0<br/>fsp3Csp2N5B:1<br/>N_H_2B:6<br/>fsp2Osp2C5B:1<br/>da_lipo_5B:5<br/>fringNC6B:1<br/>fOringC6B:2</p>  | <p>131 1361370</p>  <p>IC50(nM):135<br/>fringNplaN4B:0<br/>fsp3Csp2N5B:1<br/>N_H_2B:6<br/>fsp2Osp2C5B:1<br/>da_lipo_5B:7<br/>fringNC6B:1<br/>fOringC6B:1</p>  | <p>132 1361371</p>  <p>IC50(nM):32<br/>fringNplaN4B:0<br/>fsp3Csp2N5B:1<br/>N_H_2B:6<br/>fsp2Osp2C5B:1<br/>da_lipo_5B:6<br/>fringNC6B:0<br/>fOringC6B:1</p>   |
| <p>133 1361372</p>  <p>IC50(nM):44<br/>fringNplaN4B:0<br/>fsp3Csp2N5B:1<br/>N_H_2B:6<br/>fsp2Osp2C5B:1<br/>da_lipo_5B:5<br/>fringNC6B:0<br/>fOringC6B:1</p> | <p>134 1361374</p>  <p>IC50(nM):12<br/>fringNplaN4B:0<br/>fsp3Csp2N5B:1<br/>N_H_2B:6<br/>fsp2Osp2C5B:2<br/>da_lipo_5B:9<br/>fringNC6B:1<br/>fOringC6B:1</p> | <p>135 1361428</p>  <p>IC50(nM):19<br/>fringNplaN4B:0<br/>fsp3Csp2N5B:1<br/>N_H_2B:6<br/>fsp2Osp2C5B:2<br/>da_lipo_5B:8<br/>fringNC6B:1<br/>fOringC6B:1</p> |

|                                                                                                                                                                                                                                                           |                                                                                                                                                                                                                                                            |                                                                                                                                                                                                                                                            |
|-----------------------------------------------------------------------------------------------------------------------------------------------------------------------------------------------------------------------------------------------------------|------------------------------------------------------------------------------------------------------------------------------------------------------------------------------------------------------------------------------------------------------------|------------------------------------------------------------------------------------------------------------------------------------------------------------------------------------------------------------------------------------------------------------|
| <p>136 1361429</p> 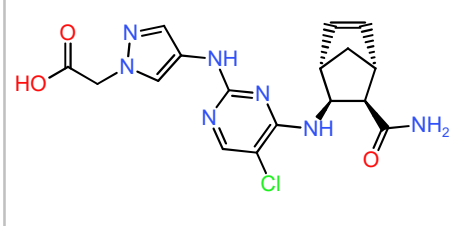 <p>IC50(nM):32<br/> fringNplaN4B:0<br/> fsp3Csp2N5B:1<br/> N_H_2B:6<br/> fsp2Osp2C5B:2<br/> da_lipo_5B:8<br/> fringNC6B:1<br/> fOringC6B:1</p>       | <p>137 1361431</p>  <p>IC50(nM):26<br/> fringNplaN4B:0<br/> fsp3Csp2N5B:1<br/> N_H_2B:7<br/> fsp2Osp2C5B:4<br/> da_lipo_5B:8<br/> fringNC6B:1<br/> fOringC6B:1</p>       | <p>138 1361432</p>  <p>IC50(nM):27<br/> fringNplaN4B:0<br/> fsp3Csp2N5B:1<br/> N_H_2B:7<br/> fsp2Osp2C5B:2<br/> da_lipo_5B:8<br/> fringNC6B:1<br/> fOringC6B:1</p>      |
| <p>139 1361433</p>  <p>IC50(nM):12<br/> fringNplaN4B:0<br/> fsp3Csp2N5B:1<br/> N_H_2B:7<br/> fsp2Osp2C5B:2<br/> da_lipo_5B:10<br/> fringNC6B:1<br/> fOringC6B:1</p>      | <p>140 1361434</p>  <p>IC50(nM):12<br/> fringNplaN4B:0<br/> fsp3Csp2N5B:1<br/> N_H_2B:7<br/> fsp2Osp2C5B:2<br/> da_lipo_5B:10<br/> fringNC6B:1<br/> fOringC6B:1</p>      | <p>141 1361435</p>  <p>IC50(nM):15<br/> fringNplaN4B:0<br/> fsp3Csp2N5B:1<br/> N_H_2B:7<br/> fsp2Osp2C5B:2<br/> da_lipo_5B:10<br/> fringNC6B:1<br/> fOringC6B:1</p>     |
| <p>142 1426822</p>  <p>IC50(nM):136.1<br/> fringNplaN4B:0<br/> fsp3Csp2N5B:0<br/> N_H_2B:6<br/> fsp2Osp2C5B:2<br/> da_lipo_5B:11<br/> fringNC6B:0<br/> fOringC6B:1</p> | <p>143 1429887</p>  <p>IC50(nM):561.5<br/> fringNplaN4B:0<br/> fsp3Csp2N5B:0<br/> N_H_2B:4<br/> fsp2Osp2C5B:1<br/> da_lipo_5B:12<br/> fringNC6B:2<br/> fOringC6B:0</p> | <p>144 1429888</p>  <p>IC50(nM):5090<br/> fringNplaN4B:0<br/> fsp3Csp2N5B:0<br/> N_H_2B:3<br/> fsp2Osp2C5B:1<br/> da_lipo_5B:12<br/> fringNC6B:2<br/> fOringC6B:0</p> |



|                                                                                                                                                                                                                                                    |                                                                                                                                                                                                                                                     |                                                                                                                                                                                                                                                    |
|----------------------------------------------------------------------------------------------------------------------------------------------------------------------------------------------------------------------------------------------------|-----------------------------------------------------------------------------------------------------------------------------------------------------------------------------------------------------------------------------------------------------|----------------------------------------------------------------------------------------------------------------------------------------------------------------------------------------------------------------------------------------------------|
| <p>145 1429890</p> 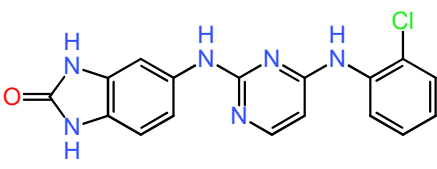 <p>IC50(nM):680.5<br/>fringNplaN4B:0<br/>fsp3Csp2N5B:0<br/>N_H_2B:5<br/>fsp2Osp2C5B:2<br/>da_lipo_5B:10<br/>fringNC6B:1<br/>fOringC6B:0</p>   | <p>146 1429891</p>  <p>IC50(nM):5755<br/>fringNplaN4B:0<br/>fsp3Csp2N5B:0<br/>N_H_2B:3<br/>fsp2Osp2C5B:0<br/>da_lipo_5B:11<br/>fringNC6B:2<br/>fOringC6B:0</p>    | <p>147 1429892</p>  <p>IC50(nM):597<br/>fringNplaN4B:0<br/>fsp3Csp2N5B:0<br/>N_H_2B:4<br/>fsp2Osp2C5B:0<br/>da_lipo_5B:11<br/>fringNC6B:1<br/>fOringC6B:2</p>   |
| <p>148 1429893</p>  <p>IC50(nM):521.65<br/>fringNplaN4B:0<br/>fsp3Csp2N5B:0<br/>N_H_2B:4<br/>fsp2Osp2C5B:1<br/>da_lipo_5B:12<br/>fringNC6B:2<br/>fOringC6B:0</p>  | <p>149 1429894</p>  <p>IC50(nM):512.8<br/>fringNplaN4B:0<br/>fsp3Csp2N5B:0<br/>N_H_2B:4<br/>fsp2Osp2C5B:0<br/>da_lipo_5B:12<br/>fringNC6B:1<br/>fOringC6B:2</p>   | <p>150 1429895</p>  <p>IC50(nM):515<br/>fringNplaN4B:0<br/>fsp3Csp2N5B:0<br/>N_H_2B:4<br/>fsp2Osp2C5B:0<br/>da_lipo_5B:13<br/>fringNC6B:1<br/>fOringC6B:2</p>   |
| <p>151 1429896</p>  <p>IC50(nM):520.2<br/>fringNplaN4B:0<br/>fsp3Csp2N5B:0<br/>N_H_2B:4<br/>fsp2Osp2C5B:1<br/>da_lipo_5B:12<br/>fringNC6B:2<br/>fOringC6B:0</p> | <p>152 1429897</p>  <p>IC50(nM):367.9<br/>fringNplaN4B:0<br/>fsp3Csp2N5B:0<br/>N_H_2B:4<br/>fsp2Osp2C5B:1<br/>da_lipo_5B:13<br/>fringNC6B:2<br/>fOringC6B:0</p> | <p>153 1429902</p>  <p>IC50(nM):553<br/>fringNplaN4B:0<br/>fsp3Csp2N5B:0<br/>N_H_2B:5<br/>fsp2Osp2C5B:0<br/>da_lipo_5B:13<br/>fringNC6B:1<br/>fOringC6B:0</p> |

|                                                                                                                                                                                                                                                              |                                                                                                                                                                                                                                                        |                                                                                                                                                                                                                                                                 |
|--------------------------------------------------------------------------------------------------------------------------------------------------------------------------------------------------------------------------------------------------------------|--------------------------------------------------------------------------------------------------------------------------------------------------------------------------------------------------------------------------------------------------------|-----------------------------------------------------------------------------------------------------------------------------------------------------------------------------------------------------------------------------------------------------------------|
| <p>154 1429926</p> 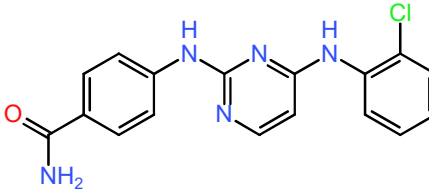 <p>IC50(nM):525.1<br/> fringNplaN4B:0<br/> fsp3Csp2N5B:0<br/> N_H_2B:4<br/> fsp2Osp2C5B:1<br/> da_lipo_5B:12<br/> fringNC6B:2<br/> fOringC6B:0</p>      | <p>155 1430075</p>  <p>IC50(nM):616<br/> fringNplaN4B:0<br/> fsp3Csp2N5B:0<br/> N_H_2B:5<br/> fsp2Osp2C5B:1<br/> da_lipo_5B:12<br/> fringNC6B:1<br/> fOringC6B:0</p> | <p>156 1430076</p>  <p>IC50(nM):546.95<br/> fringNplaN4B:0<br/> fsp3Csp2N5B:0<br/> N_H_2B:5<br/> fsp2Osp2C5B:1<br/> da_lipo_5B:12<br/> fringNC6B:2<br/> fOringC6B:0</p>      |
| <p>157 1447148</p>  <p>IC50(nM):81.33333333<br/> fringNplaN4B:0<br/> fsp3Csp2N5B:1<br/> N_H_2B:5<br/> fsp2Osp2C5B:0<br/> da_lipo_5B:4<br/> fringNC6B:0<br/> fOringC6B:0</p> | <p>158 1523084</p>  <p>IC50(nM):2593<br/> fringNplaN4B:0<br/> fsp3Csp2N5B:1<br/> N_H_2B:3<br/> fsp2Osp2C5B:2<br/> da_lipo_5B:7<br/> fringNC6B:2<br/> fOringC6B:1</p> | <p>159 1528877</p>  <p>IC50(nM):20.43333333<br/> fringNplaN4B:1<br/> fsp3Csp2N5B:0<br/> N_H_2B:3<br/> fsp2Osp2C5B:4<br/> da_lipo_5B:12<br/> fringNC6B:0<br/> fOringC6B:0</p> |
| <p>160 1560226</p>  <p>IC50(nM):2<br/> fringNplaN4B:1<br/> fsp3Csp2N5B:0<br/> N_H_2B:4<br/> fsp2Osp2C5B:6<br/> da_lipo_5B:19<br/> fringNC6B:2<br/> fOringC6B:2</p>        | <p>161 1560227</p>  <p>IC50(nM):1<br/> fringNplaN4B:1<br/> fsp3Csp2N5B:0<br/> N_H_2B:4<br/> fsp2Osp2C5B:6<br/> da_lipo_5B:22<br/> fringNC6B:2<br/> fOringC6B:2</p> | <p>162 1560231</p>  <p>IC50(nM):6<br/> fringNplaN4B:1<br/> fsp3Csp2N5B:0<br/> N_H_2B:4<br/> fsp2Osp2C5B:6<br/> da_lipo_5B:18<br/> fringNC6B:2<br/> fOringC6B:2</p>         |

|                                                                                                                                                                                                                                                                 |                                                                                                                                                                                                                                                                  |                                                                                                                                                                                                                                                                    |
|-----------------------------------------------------------------------------------------------------------------------------------------------------------------------------------------------------------------------------------------------------------------|------------------------------------------------------------------------------------------------------------------------------------------------------------------------------------------------------------------------------------------------------------------|--------------------------------------------------------------------------------------------------------------------------------------------------------------------------------------------------------------------------------------------------------------------|
| <p>163 1560237</p> 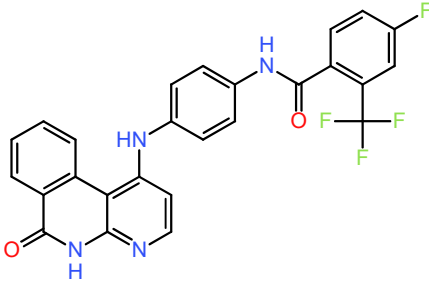 <p>IC50(nM): 26.2<br/> fringNplaN4B: 1<br/> fsp3Csp2N5B: 0<br/> N_H_2B: 4<br/> fsp2Osp2C5B: 6<br/> da_lipo_5B: 22<br/> fringNC6B: 2<br/> fOringC6B: 2</p>  | <p>164 1560243</p>  <p>IC50(nM): 1440<br/> fringNplaN4B: 0<br/> fsp3Csp2N5B: 0<br/> N_H_2B: 2<br/> fsp2Osp2C5B: 3<br/> da_lipo_5B: 10<br/> fringNC6B: 0<br/> fOringC6B: 1</p>  | <p>165 1560246</p>  <p>IC50(nM): 174<br/> fringNplaN4B: 1<br/> fsp3Csp2N5B: 0<br/> N_H_2B: 4<br/> fsp2Osp2C5B: 3<br/> da_lipo_5B: 12<br/> fringNC6B: 2<br/> fOringC6B: 1</p>    |
| <p>166 1560248</p>  <p>IC50(nM): 104.5<br/> fringNplaN4B: 1<br/> fsp3Csp2N5B: 0<br/> N_H_2B: 4<br/> fsp2Osp2C5B: 6<br/> da_lipo_5B: 18<br/> fringNC6B: 2<br/> fOringC6B: 2</p> | <p>167 1560249</p>  <p>IC50(nM): 13<br/> fringNplaN4B: 0<br/> fsp3Csp2N5B: 0<br/> N_H_2B: 5<br/> fsp2Osp2C5B: 6<br/> da_lipo_5B: 16<br/> fringNC6B: 2<br/> fOringC6B: 2</p>    | <p>168 1560250</p>  <p>IC50(nM): 79<br/> fringNplaN4B: 0<br/> fsp3Csp2N5B: 0<br/> N_H_2B: 5<br/> fsp2Osp2C5B: 5<br/> da_lipo_5B: 16<br/> fringNC6B: 2<br/> fOringC6B: 2</p>     |
| <p>169 1560251</p>  <p>IC50(nM): 21<br/> fringNplaN4B: 0<br/> fsp3Csp2N5B: 0<br/> N_H_2B: 6<br/> fsp2Osp2C5B: 6<br/> da_lipo_5B: 14<br/> fringNC6B: 2<br/> fOringC6B: 2</p>  | <p>170 1565680</p>  <p>IC50(nM): 143.9<br/> fringNplaN4B: 0<br/> fsp3Csp2N5B: 0<br/> N_H_2B: 5<br/> fsp2Osp2C5B: 0<br/> da_lipo_5B: 8<br/> fringNC6B: 0<br/> fOringC6B: 2</p> | <p>171 1565683</p>  <p>IC50(nM): 138.6<br/> fringNplaN4B: 0<br/> fsp3Csp2N5B: 0<br/> N_H_2B: 4<br/> fsp2Osp2C5B: 0<br/> da_lipo_5B: 8<br/> fringNC6B: 0<br/> fOringC6B: 0</p> |

|                                                                                                                                                                                                                                                              |                                                                                                                                                                                                                                                          |                                                                                                                                                                                                                                                           |
|--------------------------------------------------------------------------------------------------------------------------------------------------------------------------------------------------------------------------------------------------------------|----------------------------------------------------------------------------------------------------------------------------------------------------------------------------------------------------------------------------------------------------------|-----------------------------------------------------------------------------------------------------------------------------------------------------------------------------------------------------------------------------------------------------------|
| <p>172 1565684</p> 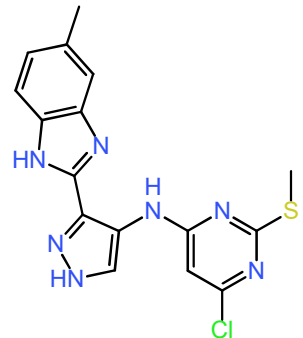 <p>IC50(nM):231.3<br/> fringNplaN4B:0<br/> fsp3Csp2N5B:0<br/> N_H_2B:4<br/> fsp2Osp2C5B:0<br/> da_lipo_5B:9<br/> fringNC6B:0<br/> fOringC6B:0</p>       | <p>173 1565686</p>  <p>IC50(nM):1201<br/> fringNplaN4B:0<br/> fsp3Csp2N5B:0<br/> N_H_2B:5<br/> fsp2Osp2C5B:0<br/> da_lipo_5B:7<br/> fringNC6B:2<br/> fOringC6B:0</p>   | <p>174 1565691</p>  <p>IC50(nM):392.3<br/> fringNplaN4B:0<br/> fsp3Csp2N5B:0<br/> N_H_2B:5<br/> fsp2Osp2C5B:1<br/> da_lipo_5B:7<br/> fringNC6B:2<br/> fOringC6B:1</p>  |
| <p>175 1569417</p>  <p>IC50(nM):3670.333333<br/> fringNplaN4B:0<br/> fsp3Csp2N5B:0<br/> N_H_2B:4<br/> fsp2Osp2C5B:1<br/> da_lipo_5B:7<br/> fringNC6B:2<br/> fOringC6B:0</p> | <p>176 1572155</p>  <p>IC50(nM):24<br/> fringNplaN4B:0<br/> fsp3Csp2N5B:0<br/> N_H_2B:4<br/> fsp2Osp2C5B:4<br/> da_lipo_5B:15<br/> fringNC6B:0<br/> fOringC6B:2</p>    | <p>177 1572308</p>  <p>IC50(nM):210<br/> fringNplaN4B:0<br/> fsp3Csp2N5B:0<br/> N_H_2B:6<br/> fsp2Osp2C5B:4<br/> da_lipo_5B:14<br/> fringNC6B:1<br/> fOringC6B:2</p>   |
| <p>178 1573025</p>  <p>IC50(nM):160<br/> fringNplaN4B:0<br/> fsp3Csp2N5B:0<br/> N_H_2B:4<br/> fsp2Osp2C5B:0<br/> da_lipo_5B:9<br/> fringNC6B:0<br/> fOringC6B:0</p>       | <p>179 1573032</p>  <p>IC50(nM):3000<br/> fringNplaN4B:0<br/> fsp3Csp2N5B:0<br/> N_H_2B:5<br/> fsp2Osp2C5B:0<br/> da_lipo_5B:5<br/> fringNC6B:0<br/> fOringC6B:0</p> | <p>180 1586133</p>  <p>IC50(nM):123<br/> fringNplaN4B:0<br/> fsp3Csp2N5B:0<br/> N_H_2B:5<br/> fsp2Osp2C5B:0<br/> da_lipo_5B:11<br/> fringNC6B:0<br/> fOringC6B:0</p> |

|                                                                                                                                                                                                                                                          |                                                                                                                                                                                                                                                             |                                                                                                                                                                                                                                                            |
|----------------------------------------------------------------------------------------------------------------------------------------------------------------------------------------------------------------------------------------------------------|-------------------------------------------------------------------------------------------------------------------------------------------------------------------------------------------------------------------------------------------------------------|------------------------------------------------------------------------------------------------------------------------------------------------------------------------------------------------------------------------------------------------------------|
| <p>181 1587785</p> 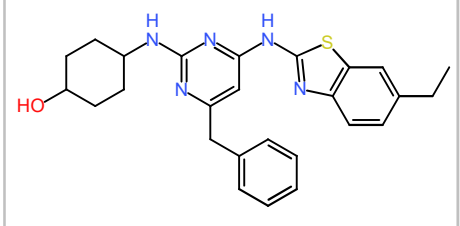 <p>IC50(nM):398.11<br/> fringNplaN4B:0<br/> fsp3Csp2N5B:1<br/> N_H_2B:2<br/> fsp2Osp2C5B:0<br/> da_lipo_5B:13<br/> fringNC6B:3<br/> fOringC6B:1</p> | <p>182 1605253</p>  <p>IC50(nM):441<br/> fringNplaN4B:0<br/> fsp3Csp2N5B:0<br/> N_H_2B:5<br/> fsp2Osp2C5B:2<br/> da_lipo_5B:13<br/> fringNC6B:2<br/> fOringC6B:2</p>      | <p>183 1605254</p>  <p>IC50(nM):7095<br/> fringNplaN4B:0<br/> fsp3Csp2N5B:0<br/> N_H_2B:3<br/> fsp2Osp2C5B:2<br/> da_lipo_5B:17<br/> fringNC6B:2<br/> fOringC6B:3</p>   |
| <p>184 1605255</p>  <p>IC50(nM):97<br/> fringNplaN4B:0<br/> fsp3Csp2N5B:0<br/> N_H_2B:5<br/> fsp2Osp2C5B:2<br/> da_lipo_5B:13<br/> fringNC6B:2<br/> fOringC6B:2</p>     | <p>185 1605256</p>  <p>IC50(nM):1087<br/> fringNplaN4B:0<br/> fsp3Csp2N5B:0<br/> N_H_2B:3<br/> fsp2Osp2C5B:2<br/> da_lipo_5B:17<br/> fringNC6B:2<br/> fOringC6B:3</p>     | <p>186 1605257</p>  <p>IC50(nM):41<br/> fringNplaN4B:0<br/> fsp3Csp2N5B:1<br/> N_H_2B:5<br/> fsp2Osp2C5B:0<br/> da_lipo_5B:6<br/> fringNC6B:0<br/> fOringC6B:1</p>      |
| <p>187 1605263</p>  <p>IC50(nM):169<br/> fringNplaN4B:0<br/> fsp3Csp2N5B:1<br/> N_H_2B:4<br/> fsp2Osp2C5B:0<br/> da_lipo_5B:4<br/> fringNC6B:2<br/> fOringC6B:0</p>   | <p>188 1605300</p>  <p>IC50(nM):2811.5<br/> fringNplaN4B:0<br/> fsp3Csp2N5B:0<br/> N_H_2B:4<br/> fsp2Osp2C5B:2<br/> da_lipo_5B:11<br/> fringNC6B:2<br/> fOringC6B:2</p> | <p>189 1605303</p>  <p>IC50(nM):3910<br/> fringNplaN4B:0<br/> fsp3Csp2N5B:0<br/> N_H_2B:4<br/> fsp2Osp2C5B:3<br/> da_lipo_5B:15<br/> fringNC6B:2<br/> fOringC6B:4</p> |

|                                                                                                                                                                                                                                                                   |                                                                                                                                                                                                                                                                     |                                                                                                                                                                                                                                                                    |
|-------------------------------------------------------------------------------------------------------------------------------------------------------------------------------------------------------------------------------------------------------------------|---------------------------------------------------------------------------------------------------------------------------------------------------------------------------------------------------------------------------------------------------------------------|--------------------------------------------------------------------------------------------------------------------------------------------------------------------------------------------------------------------------------------------------------------------|
| <p>190 1605304</p> 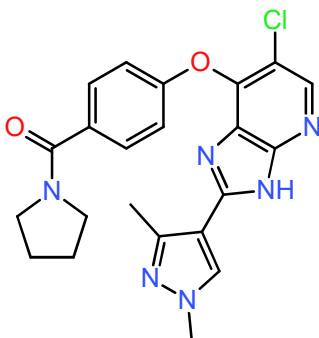 <p>IC50(nM): 1817<br/> fringNplaN4B: 0<br/> fsp3Csp2N5B: 0<br/> N_H_2B: 4<br/> fsp2Osp2C5B: 1<br/> da_lipo_5B: 4<br/> fringNC6B: 0<br/> fOringC6B: 2</p>     | <p>191 1612940</p>  <p>IC50(nM): 8690<br/> fringNplaN4B: 0<br/> fsp3Csp2N5B: 0<br/> N_H_2B: 0<br/> fsp2Osp2C5B: 0<br/> da_lipo_5B: 4<br/> fringNC6B: 0<br/> fOringC6B: 0</p>      | <p>192 1612941</p>  <p>IC50(nM): 7290<br/> fringNplaN4B: 0<br/> fsp3Csp2N5B: 0<br/> N_H_2B: 0<br/> fsp2Osp2C5B: 2<br/> da_lipo_5B: 9<br/> fringNC6B: 0<br/> fOringC6B: 0</p>    |
| <p>193 1614604</p>  <p>IC50(nM): 3890<br/> fringNplaN4B: 0<br/> fsp3Csp2N5B: 0<br/> N_H_2B: 0<br/> fsp2Osp2C5B: 0<br/> da_lipo_5B: 9<br/> fringNC6B: 0<br/> fOringC6B: 3</p>     | <p>194 1615168</p>  <p>IC50(nM): 16000<br/> fringNplaN4B: 0<br/> fsp3Csp2N5B: 0<br/> N_H_2B: 3<br/> fsp2Osp2C5B: 0<br/> da_lipo_5B: 10<br/> fringNC6B: 2<br/> fOringC6B: 1</p>    | <p>195 1622333</p>  <p>IC50(nM): 156<br/> fringNplaN4B: 0<br/> fsp3Csp2N5B: 1<br/> N_H_2B: 3<br/> fsp2Osp2C5B: 0<br/> da_lipo_5B: 13<br/> fringNC6B: 1<br/> fOringC6B: 0</p>    |
| <p>196 1622334</p>  <p>IC50(nM): 757.5<br/> fringNplaN4B: 0<br/> fsp3Csp2N5B: 0<br/> N_H_2B: 3<br/> fsp2Osp2C5B: 1<br/> da_lipo_5B: 16<br/> fringNC6B: 1<br/> fOringC6B: 2</p> | <p>197 1622335</p>  <p>IC50(nM): 2981.5<br/> fringNplaN4B: 0<br/> fsp3Csp2N5B: 0<br/> N_H_2B: 3<br/> fsp2Osp2C5B: 1<br/> da_lipo_5B: 15<br/> fringNC6B: 1<br/> fOringC6B: 2</p> | <p>198 1622337</p>  <p>IC50(nM): 2820<br/> fringNplaN4B: 0<br/> fsp3Csp2N5B: 0<br/> N_H_2B: 3<br/> fsp2Osp2C5B: 1<br/> da_lipo_5B: 16<br/> fringNC6B: 1<br/> fOringC6B: 2</p> |

|                                                                                                                                                                                                                                                                |                                                                                                                                                                                                                                                                 |                                                                                                                                                                                                                                                                   |
|----------------------------------------------------------------------------------------------------------------------------------------------------------------------------------------------------------------------------------------------------------------|-----------------------------------------------------------------------------------------------------------------------------------------------------------------------------------------------------------------------------------------------------------------|-------------------------------------------------------------------------------------------------------------------------------------------------------------------------------------------------------------------------------------------------------------------|
| <p>199 1622338</p> 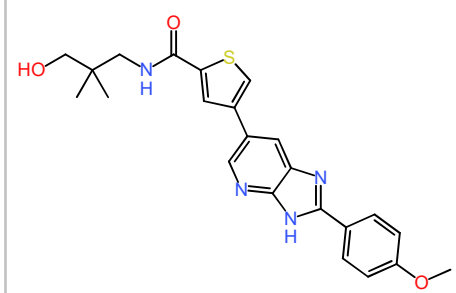 <p>IC50(nM): 1680<br/> fringNplaN4B: 0<br/> fsp3Csp2N5B: 0<br/> N_H_2B: 3<br/> fsp2Osp2C5B: 1<br/> da_lipo_5B: 15<br/> fringNC6B: 1<br/> fOringC6B: 2</p> | <p>200 1622339</p>  <p>IC50(nM): 1380<br/> fringNplaN4B: 0<br/> fsp3Csp2N5B: 0<br/> N_H_2B: 3<br/> fsp2Osp2C5B: 1<br/> da_lipo_5B: 12<br/> fringNC6B: 1<br/> fOringC6B: 2</p> | <p>201 1622340</p>  <p>IC50(nM): 2300<br/> fringNplaN4B: 0<br/> fsp3Csp2N5B: 0<br/> N_H_2B: 3<br/> fsp2Osp2C5B: 1<br/> da_lipo_5B: 12<br/> fringNC6B: 1<br/> fOringC6B: 2</p>  |
| <p>202 1622342</p>  <p>IC50(nM): 12100<br/> fringNplaN4B: 0<br/> fsp3Csp2N5B: 0<br/> N_H_2B: 2<br/> fsp2Osp2C5B: 1<br/> da_lipo_5B: 8<br/> fringNC6B: 1<br/> fOringC6B: 2</p> | <p>203 1782650</p>  <p>IC50(nM): 714<br/> fringNplaN4B: 0<br/> fsp3Csp2N5B: 0<br/> N_H_2B: 4<br/> fsp2Osp2C5B: 2<br/> da_lipo_5B: 6<br/> fringNC6B: 2<br/> fOringC6B: 0</p>   | <p>204 1782664</p>  <p>IC50(nM): 2230<br/> fringNplaN4B: 1<br/> fsp3Csp2N5B: 1<br/> N_H_2B: 3<br/> fsp2Osp2C5B: 2<br/> da_lipo_5B: 5<br/> fringNC6B: 2<br/> fOringC6B: 3</p>   |
| <p>205 1782665</p>  <p>IC50(nM): 624<br/> fringNplaN4B: 1<br/> fsp3Csp2N5B: 1<br/> N_H_2B: 3<br/> fsp2Osp2C5B: 2<br/> da_lipo_5B: 5<br/> fringNC6B: 2<br/> fOringC6B: 1</p> | <p>206 1782666</p>  <p>IC50(nM): 805<br/> fringNplaN4B: 1<br/> fsp3Csp2N5B: 1<br/> N_H_2B: 3<br/> fsp2Osp2C5B: 2<br/> da_lipo_5B: 7<br/> fringNC6B: 4<br/> fOringC6B: 1</p> | <p>207 1782667</p>  <p>IC50(nM): 227<br/> fringNplaN4B: 1<br/> fsp3Csp2N5B: 1<br/> N_H_2B: 3<br/> fsp2Osp2C5B: 2<br/> da_lipo_5B: 11<br/> fringNC6B: 4<br/> fOringC6B: 1</p> |

|                                                                                                                                                                                                                                                                |                                                                                                                                                                                                                                                                |                                                                                                                                                                                                                                                                  |
|----------------------------------------------------------------------------------------------------------------------------------------------------------------------------------------------------------------------------------------------------------------|----------------------------------------------------------------------------------------------------------------------------------------------------------------------------------------------------------------------------------------------------------------|------------------------------------------------------------------------------------------------------------------------------------------------------------------------------------------------------------------------------------------------------------------|
| <p>208 1782668</p> 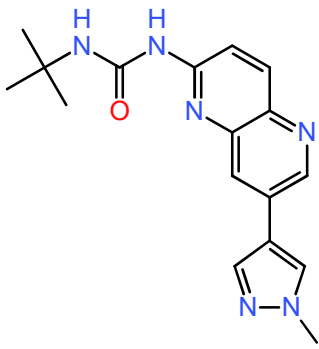 <p>IC50(nM): 260<br/> fringNplaN4B: 1<br/> fsp3Csp2N5B: 1<br/> N_H_2B: 5<br/> fsp2Osp2C5B: 2<br/> da_lipo_5B: 7<br/> fringNC6B: 3<br/> fOringC6B: 2</p>   | <p>209 1782669</p>  <p>IC50(nM): 1140<br/> fringNplaN4B: 1<br/> fsp3Csp2N5B: 0<br/> N_H_2B: 5<br/> fsp2Osp2C5B: 4<br/> da_lipo_5B: 9<br/> fringNC6B: 2<br/> fOringC6B: 3</p> | <p>210 1782671</p>  <p>IC50(nM): 171<br/> fringNplaN4B: 1<br/> fsp3Csp2N5B: 1<br/> N_H_2B: 5<br/> fsp2Osp2C5B: 3<br/> da_lipo_5B: 10<br/> fringNC6B: 1<br/> fOringC6B: 4</p>  |
| <p>211 1782672</p>  <p>IC50(nM): 1580<br/> fringNplaN4B: 0<br/> fsp3Csp2N5B: 0<br/> N_H_2B: 4<br/> fsp2Osp2C5B: 2<br/> da_lipo_5B: 10<br/> fringNC6B: 2<br/> fOringC6B: 0</p> | <p>212 1782673</p>  <p>IC50(nM): 112<br/> fringNplaN4B: 0<br/> fsp3Csp2N5B: 0<br/> N_H_2B: 6<br/> fsp2Osp2C5B: 2<br/> da_lipo_5B: 6<br/> fringNC6B: 1<br/> fOringC6B: 2</p>   | <p>213 1782674</p>  <p>IC50(nM): 1260<br/> fringNplaN4B: 0<br/> fsp3Csp2N5B: 0<br/> N_H_2B: 6<br/> fsp2Osp2C5B: 4<br/> da_lipo_5B: 8<br/> fringNC6B: 1<br/> fOringC6B: 3</p>  |
| <p>214 1782675</p>  <p>IC50(nM): 66<br/> fringNplaN4B: 0<br/> fsp3Csp2N5B: 0<br/> N_H_2B: 6<br/> fsp2Osp2C5B: 4<br/> da_lipo_5B: 9<br/> fringNC6B: 1<br/> fOringC6B: 4</p>  | <p>215 1782676</p>  <p>IC50(nM): 86<br/> fringNplaN4B: 0<br/> fsp3Csp2N5B: 0<br/> N_H_2B: 6<br/> fsp2Osp2C5B: 3<br/> da_lipo_5B: 9<br/> fringNC6B: 1<br/> fOringC6B: 4</p> | <p>216 1785128</p>  <p>IC50(nM): 25<br/> fringNplaN4B: 1<br/> fsp3Csp2N5B: 0<br/> N_H_2B: 4<br/> fsp2Osp2C5B: 3<br/> da_lipo_5B: 15<br/> fringNC6B: 1<br/> fOringC6B: 3</p> |



|                                                                                                                                                                                                                                                                  |                                                                                                                                                                                                                                                                   |                                                                                                                                                                                                                                                                    |
|------------------------------------------------------------------------------------------------------------------------------------------------------------------------------------------------------------------------------------------------------------------|-------------------------------------------------------------------------------------------------------------------------------------------------------------------------------------------------------------------------------------------------------------------|--------------------------------------------------------------------------------------------------------------------------------------------------------------------------------------------------------------------------------------------------------------------|
| <p>217 1785129</p> 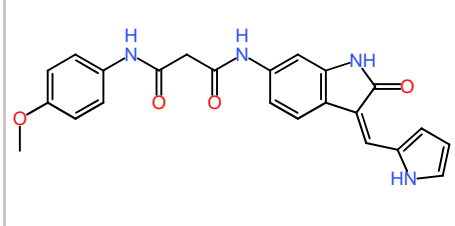 <p>IC50(nM):29.6<br/> fringNplaN4B: 1<br/> fsp3Csp2N5B: 0<br/> N_H_2B: 4<br/> fsp2Osp2C5B: 3<br/> da_lipo_5B: 13<br/> fringNC6B: 1<br/> fOringC6B: 2</p>    | <p>218 1785130</p>  <p>IC50(nM):5.9<br/> fringNplaN4B: 1<br/> fsp3Csp2N5B: 0<br/> N_H_2B: 4<br/> fsp2Osp2C5B: 3<br/> da_lipo_5B: 15<br/> fringNC6B: 1<br/> fOringC6B: 0</p>     | <p>219 1785132</p>  <p>IC50(nM):252.6<br/> fringNplaN4B: 1<br/> fsp3Csp2N5B: 0<br/> N_H_2B: 4<br/> fsp2Osp2C5B: 3<br/> da_lipo_5B: 17<br/> fringNC6B: 1<br/> fOringC6B: 3</p>   |
| <p>220 1785133</p>  <p>IC50(nM):347<br/> fringNplaN4B: 1<br/> fsp3Csp2N5B: 0<br/> N_H_2B: 4<br/> fsp2Osp2C5B: 3<br/> da_lipo_5B: 15<br/> fringNC6B: 1<br/> fOringC6B: 2</p>     | <p>221 1785138</p>  <p>IC50(nM):209.3<br/> fringNplaN4B: 1<br/> fsp3Csp2N5B: 0<br/> N_H_2B: 4<br/> fsp2Osp2C5B: 3<br/> da_lipo_5B: 11<br/> fringNC6B: 1<br/> fOringC6B: 2</p>   | <p>222 1785139</p>  <p>IC50(nM):87.4<br/> fringNplaN4B: 1<br/> fsp3Csp2N5B: 0<br/> N_H_2B: 4<br/> fsp2Osp2C5B: 3<br/> da_lipo_5B: 11<br/> fringNC6B: 0<br/> fOringC6B: 3</p>    |
| <p>223 1785140</p>  <p>IC50(nM):209.4<br/> fringNplaN4B: 1<br/> fsp3Csp2N5B: 0<br/> N_H_2B: 4<br/> fsp2Osp2C5B: 3<br/> da_lipo_5B: 11<br/> fringNC6B: 0<br/> fOringC6B: 3</p> | <p>224 1785143</p>  <p>IC50(nM):250.6<br/> fringNplaN4B: 1<br/> fsp3Csp2N5B: 0<br/> N_H_2B: 4<br/> fsp2Osp2C5B: 3<br/> da_lipo_5B: 11<br/> fringNC6B: 0<br/> fOringC6B: 3</p> | <p>225 1785144</p>  <p>IC50(nM):102.2<br/> fringNplaN4B: 1<br/> fsp3Csp2N5B: 0<br/> N_H_2B: 4<br/> fsp2Osp2C5B: 1<br/> da_lipo_5B: 11<br/> fringNC6B: 0<br/> fOringC6B: 2</p> |

|                                                                                                                                                                                                                                                                  |                                                                                                                                                                                                                                                                  |                                                                                                                                                                                                                                                                     |
|------------------------------------------------------------------------------------------------------------------------------------------------------------------------------------------------------------------------------------------------------------------|------------------------------------------------------------------------------------------------------------------------------------------------------------------------------------------------------------------------------------------------------------------|---------------------------------------------------------------------------------------------------------------------------------------------------------------------------------------------------------------------------------------------------------------------|
| <p>226 1785145</p> 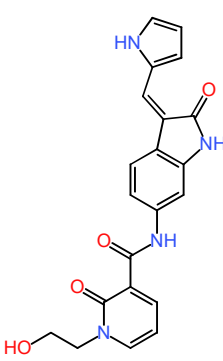 <p>IC50(nM): 32.5<br/> fringNplaN4B: 1<br/> fsp3Csp2N5B: 0<br/> N_H_2B: 4<br/> fsp2Osp2C5B: 1<br/> da_lipo_5B: 11<br/> fringNC6B: 0<br/> fOringC6B: 2</p>   | <p>227 1785147</p>  <p>IC50(nM): 14.3<br/> fringNplaN4B: 1<br/> fsp3Csp2N5B: 0<br/> N_H_2B: 4<br/> fsp2Osp2C5B: 1<br/> da_lipo_5B: 13<br/> fringNC6B: 0<br/> fOringC6B: 0</p>  | <p>228 1785148</p>  <p>IC50(nM): 127.6<br/> fringNplaN4B: 1<br/> fsp3Csp2N5B: 0<br/> N_H_2B: 4<br/> fsp2Osp2C5B: 3<br/> da_lipo_5B: 15<br/> fringNC6B: 1<br/> fOringC6B: 3</p>   |
| <p>229 1785149</p>  <p>IC50(nM): 10.2<br/> fringNplaN4B: 1<br/> fsp3Csp2N5B: 0<br/> N_H_2B: 4<br/> fsp2Osp2C5B: 3<br/> da_lipo_5B: 15<br/> fringNC6B: 1<br/> fOringC6B: 2</p>   | <p>230 1785150</p>  <p>IC50(nM): 33.1<br/> fringNplaN4B: 1<br/> fsp3Csp2N5B: 0<br/> N_H_2B: 4<br/> fsp2Osp2C5B: 3<br/> da_lipo_5B: 15<br/> fringNC6B: 1<br/> fOringC6B: 3</p>  | <p>231 1785151</p>  <p>IC50(nM): 63.2<br/> fringNplaN4B: 1<br/> fsp3Csp2N5B: 0<br/> N_H_2B: 4<br/> fsp2Osp2C5B: 3<br/> da_lipo_5B: 15<br/> fringNC6B: 1<br/> fOringC6B: 3</p>    |
| <p>232 1785152</p>  <p>IC50(nM): 53.8<br/> fringNplaN4B: 1<br/> fsp3Csp2N5B: 0<br/> N_H_2B: 4<br/> fsp2Osp2C5B: 3<br/> da_lipo_5B: 15<br/> fringNC6B: 1<br/> fOringC6B: 3</p> | <p>233 1785153</p>  <p>IC50(nM): 348<br/> fringNplaN4B: 1<br/> fsp3Csp2N5B: 0<br/> N_H_2B: 4<br/> fsp2Osp2C5B: 3<br/> da_lipo_5B: 15<br/> fringNC6B: 1<br/> fOringC6B: 3</p> | <p>234 1785154</p>  <p>IC50(nM): 161.4<br/> fringNplaN4B: 1<br/> fsp3Csp2N5B: 0<br/> N_H_2B: 4<br/> fsp2Osp2C5B: 3<br/> da_lipo_5B: 15<br/> fringNC6B: 1<br/> fOringC6B: 3</p> |

|                                                                                                                                                                                                                                                                |                                                                                                                                                                                                                                                                  |                                                                                                                                                                                                                                                                    |
|----------------------------------------------------------------------------------------------------------------------------------------------------------------------------------------------------------------------------------------------------------------|------------------------------------------------------------------------------------------------------------------------------------------------------------------------------------------------------------------------------------------------------------------|--------------------------------------------------------------------------------------------------------------------------------------------------------------------------------------------------------------------------------------------------------------------|
| <p>235 1785155</p> 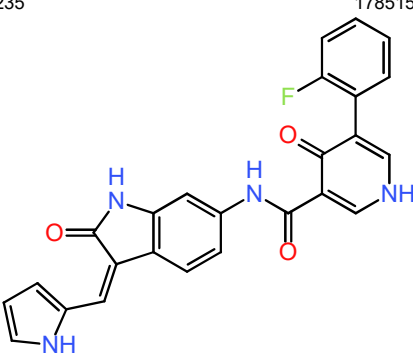 <p>IC50(nM):25.5<br/> fringNplaN4B: 1<br/> fsp3Csp2N5B: 0<br/> N_H_2B: 4<br/> fsp2Osp2C5B: 3<br/> da_lipo_5B: 16<br/> fringNC6B: 1<br/> fOringC6B: 3</p>  | <p>236 1785156</p>  <p>IC50(nM):29.2<br/> fringNplaN4B: 1<br/> fsp3Csp2N5B: 0<br/> N_H_2B: 4<br/> fsp2Osp2C5B: 1<br/> da_lipo_5B: 11<br/> fringNC6B: 0<br/> fOringC6B: 2</p>   | <p>237 1785504</p>  <p>IC50(nM):2407.725<br/> fringNplaN4B: 0<br/> fsp3Csp2N5B: 0<br/> N_H_2B: 2<br/> fsp2Osp2C5B: 3<br/> da_lipo_5B: 9<br/> fringNC6B: 3<br/> fOringC6B: 0</p> |
| <p>238 1788640</p>  <p>IC50(nM):54.45<br/> fringNplaN4B: 1<br/> fsp3Csp2N5B: 0<br/> N_H_2B: 4<br/> fsp2Osp2C5B: 2<br/> da_lipo_5B: 13<br/> fringNC6B: 0<br/> fOringC6B: 2</p> | <p>239 1788644</p>  <p>IC50(nM):6.5<br/> fringNplaN4B: 1<br/> fsp3Csp2N5B: 0<br/> N_H_2B: 4<br/> fsp2Osp2C5B: 2<br/> da_lipo_5B: 14<br/> fringNC6B: 0<br/> fOringC6B: 2</p>    | <p>240 1788645</p>  <p>IC50(nM):7.7<br/> fringNplaN4B: 1<br/> fsp3Csp2N5B: 0<br/> N_H_2B: 4<br/> fsp2Osp2C5B: 2<br/> da_lipo_5B: 15<br/> fringNC6B: 0<br/> fOringC6B: 2</p>     |
| <p>241 1788646</p>  <p>IC50(nM):6.5<br/> fringNplaN4B: 1<br/> fsp3Csp2N5B: 0<br/> N_H_2B: 4<br/> fsp2Osp2C5B: 2<br/> da_lipo_5B: 15<br/> fringNC6B: 0<br/> fOringC6B: 2</p> | <p>242 1788647</p>  <p>IC50(nM):40.9<br/> fringNplaN4B: 1<br/> fsp3Csp2N5B: 0<br/> N_H_2B: 4<br/> fsp2Osp2C5B: 2<br/> da_lipo_5B: 14<br/> fringNC6B: 0<br/> fOringC6B: 2</p> | <p>243 1788648</p>  <p>IC50(nM):15<br/> fringNplaN4B: 1<br/> fsp3Csp2N5B: 0<br/> N_H_2B: 4<br/> fsp2Osp2C5B: 2<br/> da_lipo_5B: 15<br/> fringNC6B: 0<br/> fOringC6B: 2</p>    |

|                                                                                                                                                                                                                                                                 |                                                                                                                                                                                                                                                                   |                                                                                                                                                                                                                                                                   |
|-----------------------------------------------------------------------------------------------------------------------------------------------------------------------------------------------------------------------------------------------------------------|-------------------------------------------------------------------------------------------------------------------------------------------------------------------------------------------------------------------------------------------------------------------|-------------------------------------------------------------------------------------------------------------------------------------------------------------------------------------------------------------------------------------------------------------------|
| <p>244 1788649</p> 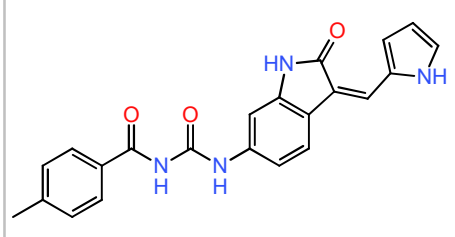 <p>IC50(nM): 18.4<br/> fringNplaN4B: 1<br/> fsp3Csp2N5B: 0<br/> N_H_2B: 4<br/> fsp2Osp2C5B: 2<br/> da_lipo_5B: 14<br/> fringNC6B: 0<br/> fOringC6B: 2</p>  | <p>245 1788650</p>  <p>IC50(nM): 29.8<br/> fringNplaN4B: 1<br/> fsp3Csp2N5B: 0<br/> N_H_2B: 4<br/> fsp2Osp2C5B: 2<br/> da_lipo_5B: 12<br/> fringNC6B: 0<br/> fOringC6B: 2</p>   | <p>246 1788651</p>  <p>IC50(nM): 158.7<br/> fringNplaN4B: 1<br/> fsp3Csp2N5B: 0<br/> N_H_2B: 5<br/> fsp2Osp2C5B: 2<br/> da_lipo_5B: 13<br/> fringNC6B: 0<br/> fOringC6B: 2</p> |
| <p>247 1788653</p>  <p>IC50(nM): 55.5<br/> fringNplaN4B: 1<br/> fsp3Csp2N5B: 0<br/> N_H_2B: 4<br/> fsp2Osp2C5B: 2<br/> da_lipo_5B: 15<br/> fringNC6B: 0<br/> fOringC6B: 2</p>  | <p>248 1788656</p>  <p>IC50(nM): 1.8<br/> fringNplaN4B: 1<br/> fsp3Csp2N5B: 0<br/> N_H_2B: 4<br/> fsp2Osp2C5B: 2<br/> da_lipo_5B: 16<br/> fringNC6B: 0<br/> fOringC6B: 0</p>    | <p>249 1788660</p>  <p>IC50(nM): 2.3<br/> fringNplaN4B: 1<br/> fsp3Csp2N5B: 0<br/> N_H_2B: 4<br/> fsp2Osp2C5B: 2<br/> da_lipo_5B: 16<br/> fringNC6B: 0<br/> fOringC6B: 0</p>   |
| <p>250 1795182</p>  <p>IC50(nM): 275<br/> fringNplaN4B: 0<br/> fsp3Csp2N5B: 0<br/> N_H_2B: 4<br/> fsp2Osp2C5B: 3<br/> da_lipo_5B: 13<br/> fringNC6B: 2<br/> fOringC6B: 1</p> | <p>251 1795186</p>  <p>IC50(nM): 27.3<br/> fringNplaN4B: 0<br/> fsp3Csp2N5B: 1<br/> N_H_2B: 4<br/> fsp2Osp2C5B: 3<br/> da_lipo_5B: 13<br/> fringNC6B: 3<br/> fOringC6B: 1</p> | <p>252 1795187</p>  <p>IC50(nM): 689<br/> fringNplaN4B: 0<br/> fsp3Csp2N5B: 1<br/> N_H_2B: 4<br/> fsp2Osp2C5B: 3<br/> da_lipo_5B: 13<br/> fringNC6B: 3<br/> fOringC6B: 1</p> |

|                                                                                                                                                                                                                                                                    |                                                                                                                                                                                                                                                                    |                                                                                                                                                                                                                                                                     |
|--------------------------------------------------------------------------------------------------------------------------------------------------------------------------------------------------------------------------------------------------------------------|--------------------------------------------------------------------------------------------------------------------------------------------------------------------------------------------------------------------------------------------------------------------|---------------------------------------------------------------------------------------------------------------------------------------------------------------------------------------------------------------------------------------------------------------------|
| <p>253 1795188</p> 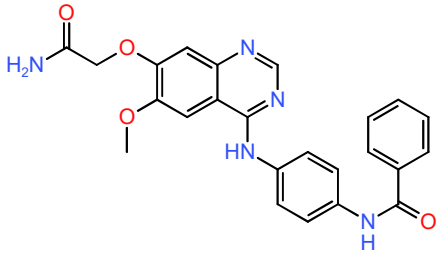 <p>IC50(nM): 155<br/> fringNplaN4B: 0<br/> fsp3Csp2N5B: 1<br/> N_H_2B: 5<br/> fsp2Osp2C5B: 5<br/> da_lipo_5B: 13<br/> fringNC6B: 3<br/> fOringC6B: 1</p>      | <p>254 1817447</p>  <p>IC50(nM): 7.4<br/> fringNplaN4B: 0<br/> fsp3Csp2N5B: 1<br/> N_H_2B: 4<br/> fsp2Osp2C5B: 4<br/> da_lipo_5B: 16<br/> fringNC6B: 0<br/> fOringC6B: 2</p>     | <p>255 1817451</p>  <p>IC50(nM): 10<br/> fringNplaN4B: 0<br/> fsp3Csp2N5B: 1<br/> N_H_2B: 3<br/> fsp2Osp2C5B: 4<br/> da_lipo_5B: 16<br/> fringNC6B: 0<br/> fOringC6B: 2</p>      |
| <p>256 1817461</p>  <p>IC50(nM): 49<br/> fringNplaN4B: 0<br/> fsp3Csp2N5B: 1<br/> N_H_2B: 4<br/> fsp2Osp2C5B: 4<br/> da_lipo_5B: 16<br/> fringNC6B: 0<br/> fOringC6B: 4</p>       | <p>257 1817469</p>  <p>IC50(nM): 14<br/> fringNplaN4B: 0<br/> fsp3Csp2N5B: 1<br/> N_H_2B: 4<br/> fsp2Osp2C5B: 4<br/> da_lipo_5B: 16<br/> fringNC6B: 0<br/> fOringC6B: 2</p>      | <p>258 1818303</p>  <p>IC50(nM): 107<br/> fringNplaN4B: 0<br/> fsp3Csp2N5B: 2<br/> N_H_2B: 7<br/> fsp2Osp2C5B: 0<br/> da_lipo_5B: 5<br/> fringNC6B: 0<br/> fOringC6B: 0</p>      |
| <p>259 1820426</p>  <p>IC50(nM): 586.15<br/> fringNplaN4B: 0<br/> fsp3Csp2N5B: 0<br/> N_H_2B: 3<br/> fsp2Osp2C5B: 4<br/> da_lipo_5B: 10<br/> fringNC6B: 0<br/> fOringC6B: 3</p> | <p>260 1820427</p>  <p>IC50(nM): 185.8<br/> fringNplaN4B: 0<br/> fsp3Csp2N5B: 0<br/> N_H_2B: 3<br/> fsp2Osp2C5B: 4<br/> da_lipo_5B: 10<br/> fringNC6B: 0<br/> fOringC6B: 3</p> | <p>261 1825314</p>  <p>IC50(nM): 1897.5<br/> fringNplaN4B: 0<br/> fsp3Csp2N5B: 0<br/> N_H_2B: 0<br/> fsp2Osp2C5B: 3<br/> da_lipo_5B: 5<br/> fringNC6B: 0<br/> fOringC6B: 0</p> |

|                                                                                                                                                                                                                                                         |                                                                                                                                                                                                                                                             |                                                                                                                                                                                                                                                                 |
|---------------------------------------------------------------------------------------------------------------------------------------------------------------------------------------------------------------------------------------------------------|-------------------------------------------------------------------------------------------------------------------------------------------------------------------------------------------------------------------------------------------------------------|-----------------------------------------------------------------------------------------------------------------------------------------------------------------------------------------------------------------------------------------------------------------|
| <p>262 1827269</p> 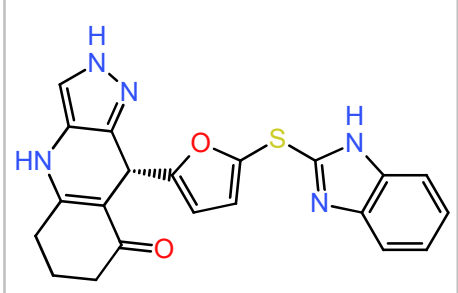 <p>IC50(nM):500<br/> fringNplaN4B:0<br/> fsp3Csp2N5B:0<br/> N_H_2B:4<br/> fsp2Osp2C5B:2<br/> da_lipo_5B:12<br/> fringNC6B:0<br/> fOringC6B:2</p>   | <p>263 1827274</p>  <p>IC50(nM):127<br/> fringNplaN4B:0<br/> fsp3Csp2N5B:0<br/> N_H_2B:3<br/> fsp2Osp2C5B:3<br/> da_lipo_5B:13<br/> fringNC6B:0<br/> fOringC6B:2</p>      | <p>264 1827275</p>  <p>IC50(nM):170.3333333<br/> fringNplaN4B:0<br/> fsp3Csp2N5B:0<br/> N_H_2B:3<br/> fsp2Osp2C5B:3<br/> da_lipo_5B:14<br/> fringNC6B:0<br/> fOringC6B:2</p> |
| <p>265 1827304</p>  <p>IC50(nM):16.33<br/> fringNplaN4B:0<br/> fsp3Csp2N5B:0<br/> N_H_2B:3<br/> fsp2Osp2C5B:4<br/> da_lipo_5B:16<br/> fringNC6B:0<br/> fOringC6B:0</p> | <p>266 1840536</p>  <p>IC50(nM):395<br/> fringNplaN4B:1<br/> fsp3Csp2N5B:1<br/> N_H_2B:5<br/> fsp2Osp2C5B:1<br/> da_lipo_5B:12<br/> fringNC6B:2<br/> fOringC6B:2</p>      | <p>267 1928549</p>  <p>IC50(nM):63.1<br/> fringNplaN4B:0<br/> fsp3Csp2N5B:1<br/> N_H_2B:5<br/> fsp2Osp2C5B:0<br/> da_lipo_5B:3<br/> fringNC6B:0<br/> fOringC6B:1</p>         |
| <p>268 1949692</p>  <p>IC50(nM):2500<br/> fringNplaN4B:0<br/> fsp3Csp2N5B:0<br/> N_H_2B:3<br/> fsp2Osp2C5B:0<br/> da_lipo_5B:9<br/> fringNC6B:1<br/> fOringC6B:4</p> | <p>269 1955097</p>  <p>IC50(nM):1291.5<br/> fringNplaN4B:1<br/> fsp3Csp2N5B:0<br/> N_H_2B:4<br/> fsp2Osp2C5B:1<br/> da_lipo_5B:10<br/> fringNC6B:3<br/> fOringC6B:2</p> | <p>270 1955098</p>  <p>IC50(nM):948.5<br/> fringNplaN4B:0<br/> fsp3Csp2N5B:0<br/> N_H_2B:5<br/> fsp2Osp2C5B:3<br/> da_lipo_5B:15<br/> fringNC6B:1<br/> fOringC6B:5</p>     |

|                                                                                                                                                                                                                                                                 |                                                                                                                                                                                                                                                                 |                                                                                                                                                                                                                                                                   |
|-----------------------------------------------------------------------------------------------------------------------------------------------------------------------------------------------------------------------------------------------------------------|-----------------------------------------------------------------------------------------------------------------------------------------------------------------------------------------------------------------------------------------------------------------|-------------------------------------------------------------------------------------------------------------------------------------------------------------------------------------------------------------------------------------------------------------------|
| <p>271 1965882</p> 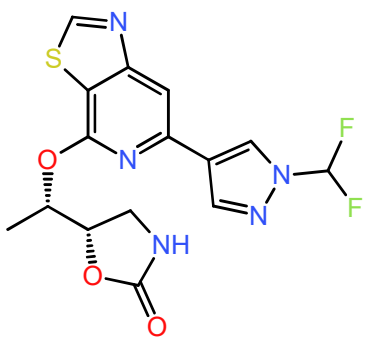 <p>IC50(nM): 110<br/> fringNplaN4B: 0<br/> fsp3Csp2N5B: 1<br/> N_H_2B: 4<br/> fsp2Osp2C5B: 0<br/> da_lipo_5B: 1<br/> fringNC6B: 0<br/> fOringC6B: 0</p>    | <p>272 1966643</p>  <p>IC50(nM): 1711<br/> fringNplaN4B: 0<br/> fsp3Csp2N5B: 1<br/> N_H_2B: 5<br/> fsp2Osp2C5B: 0<br/> da_lipo_5B: 8<br/> fringNC6B: 0<br/> fOringC6B: 2</p>  | <p>273 1966645</p>  <p>IC50(nM): 985.2<br/> fringNplaN4B: 0<br/> fsp3Csp2N5B: 1<br/> N_H_2B: 5<br/> fsp2Osp2C5B: 0<br/> da_lipo_5B: 8<br/> fringNC6B: 0<br/> fOringC6B: 2</p>  |
| <p>274 1978966</p>  <p>IC50(nM): 11.21<br/> fringNplaN4B: 0<br/> fsp3Csp2N5B: 0<br/> N_H_2B: 6<br/> fsp2Osp2C5B: 4<br/> da_lipo_5B: 19<br/> fringNC6B: 2<br/> fOringC6B: 3</p> | <p>275 2003425</p>  <p>IC50(nM): 2.5<br/> fringNplaN4B: 1<br/> fsp3Csp2N5B: 1<br/> N_H_2B: 6<br/> fsp2Osp2C5B: 7<br/> da_lipo_5B: 14<br/> fringNC6B: 2<br/> fOringC6B: 1</p>  | <p>276 2003426</p>  <p>IC50(nM): 5.6<br/> fringNplaN4B: 1<br/> fsp3Csp2N5B: 1<br/> N_H_2B: 6<br/> fsp2Osp2C5B: 7<br/> da_lipo_5B: 16<br/> fringNC6B: 2<br/> fOringC6B: 2</p>   |
| <p>277 2003428</p>  <p>IC50(nM): 3.9<br/> fringNplaN4B: 1<br/> fsp3Csp2N5B: 1<br/> N_H_2B: 4<br/> fsp2Osp2C5B: 3<br/> da_lipo_5B: 13<br/> fringNC6B: 2<br/> fOringC6B: 0</p> | <p>278 2003440</p>  <p>IC50(nM): 11<br/> fringNplaN4B: 1<br/> fsp3Csp2N5B: 1<br/> N_H_2B: 4<br/> fsp2Osp2C5B: 3<br/> da_lipo_5B: 15<br/> fringNC6B: 3<br/> fOringC6B: 0</p> | <p>279 2003446</p>  <p>IC50(nM): 4.1<br/> fringNplaN4B: 1<br/> fsp3Csp2N5B: 1<br/> N_H_2B: 5<br/> fsp2Osp2C5B: 4<br/> da_lipo_5B: 11<br/> fringNC6B: 2<br/> fOringC6B: 0</p> |

|                                                                                                                                                                                                                                                         |                                                                                                                                                                                                                                                         |                                                                                                                                                                                                                                                           |
|---------------------------------------------------------------------------------------------------------------------------------------------------------------------------------------------------------------------------------------------------------|---------------------------------------------------------------------------------------------------------------------------------------------------------------------------------------------------------------------------------------------------------|-----------------------------------------------------------------------------------------------------------------------------------------------------------------------------------------------------------------------------------------------------------|
| <p>280 2003455</p> 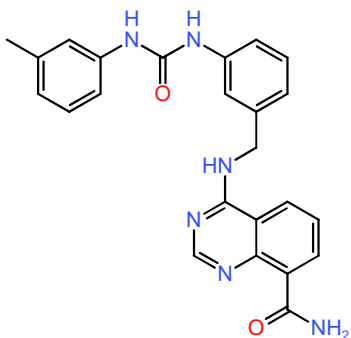 <p>IC50(nM):4.3<br/>fringNplaN4B: 1<br/>fsp3Csp2N5B: 1<br/>N_H_2B: 6<br/>fsp2Osp2C5B: 7<br/>da_lipo_5B: 16<br/>fringNC6B: 2<br/>fOringC6B: 2</p>   | <p>281 2003466</p>  <p>IC50(nM):2.2<br/>fringNplaN4B: 1<br/>fsp3Csp2N5B: 1<br/>N_H_2B: 6<br/>fsp2Osp2C5B: 5<br/>da_lipo_5B: 13<br/>fringNC6B: 0<br/>fOringC6B: 1</p>  | <p>282 2003467</p>  <p>IC50(nM):23<br/>fringNplaN4B: 1<br/>fsp3Csp2N5B: 1<br/>N_H_2B: 5<br/>fsp2Osp2C5B: 3<br/>da_lipo_5B: 11<br/>fringNC6B: 1<br/>fOringC6B: 0</p>    |
| <p>283 2003469</p>  <p>IC50(nM):0.71<br/>fringNplaN4B: 1<br/>fsp3Csp2N5B: 1<br/>N_H_2B: 5<br/>fsp2Osp2C5B: 6<br/>da_lipo_5B: 16<br/>fringNC6B: 2<br/>fOringC6B: 1</p>  | <p>284 2003471</p>  <p>IC50(nM):0.52<br/>fringNplaN4B: 1<br/>fsp3Csp2N5B: 1<br/>N_H_2B: 6<br/>fsp2Osp2C5B: 6<br/>da_lipo_5B: 15<br/>fringNC6B: 2<br/>fOringC6B: 1</p> | <p>285 2003472</p>  <p>IC50(nM):1.2<br/>fringNplaN4B: 1<br/>fsp3Csp2N5B: 1<br/>N_H_2B: 5<br/>fsp2Osp2C5B: 6<br/>da_lipo_5B: 14<br/>fringNC6B: 2<br/>fOringC6B: 1</p>   |
| <p>286 2003473</p>  <p>IC50(nM):2.1<br/>fringNplaN4B: 1<br/>fsp3Csp2N5B: 1<br/>N_H_2B: 5<br/>fsp2Osp2C5B: 7<br/>da_lipo_5B: 16<br/>fringNC6B: 2<br/>fOringC6B: 2</p> | <p>287 2003474</p>  <p>IC50(nM):3<br/>fringNplaN4B: 1<br/>fsp3Csp2N5B: 1<br/>N_H_2B: 5<br/>fsp2Osp2C5B: 6<br/>da_lipo_5B: 17<br/>fringNC6B: 2<br/>fOringC6B: 1</p>  | <p>288 2003475</p>  <p>IC50(nM):1.2<br/>fringNplaN4B: 1<br/>fsp3Csp2N5B: 1<br/>N_H_2B: 5<br/>fsp2Osp2C5B: 6<br/>da_lipo_5B: 16<br/>fringNC6B: 2<br/>fOringC6B: 1</p> |



|                                                                                                                                                                                                                                                                |                                                                                                                                                                                                                                                                   |                                                                                                                                                                                                                                                                    |
|----------------------------------------------------------------------------------------------------------------------------------------------------------------------------------------------------------------------------------------------------------------|-------------------------------------------------------------------------------------------------------------------------------------------------------------------------------------------------------------------------------------------------------------------|--------------------------------------------------------------------------------------------------------------------------------------------------------------------------------------------------------------------------------------------------------------------|
| <p>289 2003477</p> 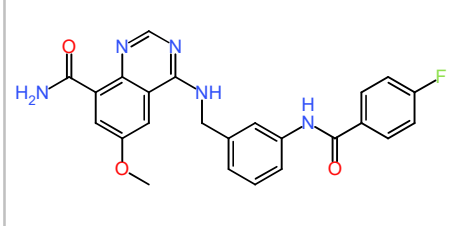 <p>IC50(nM): 1.7<br/> fringNplaN4B: 1<br/> fsp3Csp2N5B: 1<br/> N_H_2B: 5<br/> fsp2Osp2C5B: 6<br/> da_lipo_5B: 15<br/> fringNC6B: 3<br/> fOringC6B: 1</p>  | <p>290 2003479</p>  <p>IC50(nM): 1.6<br/> fringNplaN4B: 1<br/> fsp3Csp2N5B: 1<br/> N_H_2B: 5<br/> fsp2Osp2C5B: 7<br/> da_lipo_5B: 16<br/> fringNC6B: 2<br/> fOringC6B: 2</p>    | <p>291 2003480</p>  <p>IC50(nM): 7.8<br/> fringNplaN4B: 1<br/> fsp3Csp2N5B: 1<br/> N_H_2B: 5<br/> fsp2Osp2C5B: 6<br/> da_lipo_5B: 15<br/> fringNC6B: 3<br/> fOringC6B: 1</p>    |
| <p>292 2003486</p>  <p>IC50(nM): 0.46<br/> fringNplaN4B: 2<br/> fsp3Csp2N5B: 1<br/> N_H_2B: 6<br/> fsp2Osp2C5B: 6<br/> da_lipo_5B: 13<br/> fringNC6B: 2<br/> fOringC6B: 1</p> | <p>293 2003488</p>  <p>IC50(nM): 2.9<br/> fringNplaN4B: 1<br/> fsp3Csp2N5B: 1<br/> N_H_2B: 5<br/> fsp2Osp2C5B: 6<br/> da_lipo_5B: 14<br/> fringNC6B: 1<br/> fOringC6B: 1</p>    | <p>294 2003492</p>  <p>IC50(nM): 88<br/> fringNplaN4B: 1<br/> fsp3Csp2N5B: 1<br/> N_H_2B: 5<br/> fsp2Osp2C5B: 3<br/> da_lipo_5B: 10<br/> fringNC6B: 2<br/> fOringC6B: 0</p>     |
| <p>295 2003494</p>  <p>IC50(nM): 25<br/> fringNplaN4B: 1<br/> fsp3Csp2N5B: 1<br/> N_H_2B: 6<br/> fsp2Osp2C5B: 5<br/> da_lipo_5B: 14<br/> fringNC6B: 2<br/> fOringC6B: 1</p> | <p>296 2003498</p>  <p>IC50(nM): 0.94<br/> fringNplaN4B: 2<br/> fsp3Csp2N5B: 1<br/> N_H_2B: 7<br/> fsp2Osp2C5B: 6<br/> da_lipo_5B: 13<br/> fringNC6B: 2<br/> fOringC6B: 1</p> | <p>297 2003499</p>  <p>IC50(nM): 0.73<br/> fringNplaN4B: 1<br/> fsp3Csp2N5B: 1<br/> N_H_2B: 6<br/> fsp2Osp2C5B: 6<br/> da_lipo_5B: 13<br/> fringNC6B: 1<br/> fOringC6B: 1</p> |

|                                                                                                                                                                                                                                                                 |                                                                                                                                                                                                                                                                 |                                                                                                                                                                                                                                                                  |
|-----------------------------------------------------------------------------------------------------------------------------------------------------------------------------------------------------------------------------------------------------------------|-----------------------------------------------------------------------------------------------------------------------------------------------------------------------------------------------------------------------------------------------------------------|------------------------------------------------------------------------------------------------------------------------------------------------------------------------------------------------------------------------------------------------------------------|
| <p>298 2003500</p> 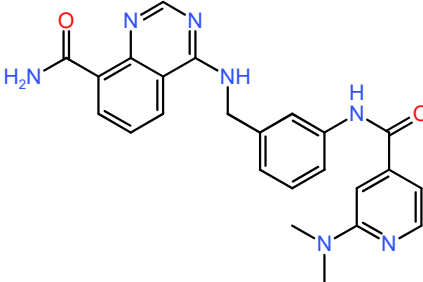 <p>IC50(nM): 2.6<br/> fringNplaN4B: 1<br/> fsp3Csp2N5B: 1<br/> N_H_2B: 7<br/> fsp2Osp2C5B: 5<br/> da_lipo_5B: 13<br/> fringNC6B: 2<br/> fOringC6B: 1</p>   | <p>299 2005920</p>  <p>IC50(nM): 484<br/> fringNplaN4B: 0<br/> fsp3Csp2N5B: 1<br/> N_H_2B: 5<br/> fsp2Osp2C5B: 3<br/> da_lipo_5B: 11<br/> fringNC6B: 1<br/> fOringC6B: 2</p>  | <p>300 2008378</p>  <p>IC50(nM): 170<br/> fringNplaN4B: 1<br/> fsp3Csp2N5B: 1<br/> N_H_2B: 4<br/> fsp2Osp2C5B: 3<br/> da_lipo_5B: 10<br/> fringNC6B: 3<br/> fOringC6B: 0</p>  |
| <p>301 2008379</p>  <p>IC50(nM): 48<br/> fringNplaN4B: 1<br/> fsp3Csp2N5B: 1<br/> N_H_2B: 5<br/> fsp2Osp2C5B: 3<br/> da_lipo_5B: 10<br/> fringNC6B: 2<br/> fOringC6B: 0</p>    | <p>302 2008380</p>  <p>IC50(nM): 7.1<br/> fringNplaN4B: 1<br/> fsp3Csp2N5B: 1<br/> N_H_2B: 5<br/> fsp2Osp2C5B: 4<br/> da_lipo_5B: 11<br/> fringNC6B: 3<br/> fOringC6B: 0</p> | <p>303 2008403</p>  <p>IC50(nM): 7.6<br/> fringNplaN4B: 1<br/> fsp3Csp2N5B: 1<br/> N_H_2B: 4<br/> fsp2Osp2C5B: 3<br/> da_lipo_5B: 15<br/> fringNC6B: 3<br/> fOringC6B: 0</p>  |
| <p>304 2008422</p>  <p>IC50(nM): 1.5<br/> fringNplaN4B: 1<br/> fsp3Csp2N5B: 1<br/> N_H_2B: 6<br/> fsp2Osp2C5B: 7<br/> da_lipo_5B: 15<br/> fringNC6B: 2<br/> fOringC6B: 2</p> | <p>305 2008430</p>  <p>IC50(nM): 12<br/> fringNplaN4B: 2<br/> fsp3Csp2N5B: 1<br/> N_H_2B: 3<br/> fsp2Osp2C5B: 3<br/> da_lipo_5B: 13<br/> fringNC6B: 1<br/> fOringC6B: 1</p> | <p>306 2008432</p>  <p>IC50(nM): 13<br/> fringNplaN4B: 1<br/> fsp3Csp2N5B: 1<br/> N_H_2B: 5<br/> fsp2Osp2C5B: 3<br/> da_lipo_5B: 11<br/> fringNC6B: 2<br/> fOringC6B: 0</p> |

|                                                                                                                                                                                                                                                         |                                                                                                                                                                                                                                                          |                                                                                                                                                                                                                                                           |
|---------------------------------------------------------------------------------------------------------------------------------------------------------------------------------------------------------------------------------------------------------|----------------------------------------------------------------------------------------------------------------------------------------------------------------------------------------------------------------------------------------------------------|-----------------------------------------------------------------------------------------------------------------------------------------------------------------------------------------------------------------------------------------------------------|
| <p>307 2008495</p> 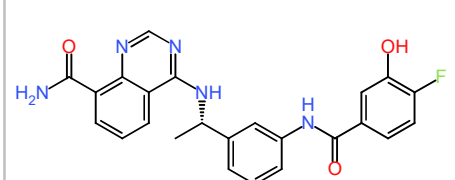 <p>IC50(nM):0.4<br/>fringNplaN4B: 1<br/>fsp3Csp2N5B: 1<br/>N_H_2B: 5<br/>fsp2Osp2C5B: 6<br/>da_lipo_5B: 17<br/>fringNC6B: 2<br/>fOringC6B: 1</p>   | <p>308 2008497</p>  <p>IC50(nM):0.35<br/>fringNplaN4B: 1<br/>fsp3Csp2N5B: 1<br/>N_H_2B: 5<br/>fsp2Osp2C5B: 6<br/>da_lipo_5B: 17<br/>fringNC6B: 2<br/>fOringC6B: 1</p>  | <p>309 2008505</p>  <p>IC50(nM): 1.1<br/>fringNplaN4B: 2<br/>fsp3Csp2N5B: 1<br/>N_H_2B: 7<br/>fsp2Osp2C5B: 6<br/>da_lipo_5B: 12<br/>fringNC6B: 2<br/>fOringC6B: 3</p>  |
| <p>310 2008517</p>  <p>IC50(nM): 1.3<br/>fringNplaN4B: 1<br/>fsp3Csp2N5B: 1<br/>N_H_2B: 7<br/>fsp2Osp2C5B: 5<br/>da_lipo_5B: 16<br/>fringNC6B: 2<br/>fOringC6B: 1</p> | <p>311 2008518</p>  <p>IC50(nM):0.66<br/>fringNplaN4B: 1<br/>fsp3Csp2N5B: 1<br/>N_H_2B: 5<br/>fsp2Osp2C5B: 5<br/>da_lipo_5B: 17<br/>fringNC6B: 2<br/>fOringC6B: 1</p> | <p>312 2008530</p>  <p>IC50(nM):9.6<br/>fringNplaN4B: 1<br/>fsp3Csp2N5B: 1<br/>N_H_2B: 5<br/>fsp2Osp2C5B: 3<br/>da_lipo_5B: 12<br/>fringNC6B: 2<br/>fOringC6B: 0</p>  |
| <p>313 2008539</p>  <p>IC50(nM):1.4<br/>fringNplaN4B: 2<br/>fsp3Csp2N5B: 1<br/>N_H_2B: 6<br/>fsp2Osp2C5B: 6<br/>da_lipo_5B: 15<br/>fringNC6B: 2<br/>fOringC6B: 1</p> | <p>314 2008543</p>  <p>IC50(nM):1.2<br/>fringNplaN4B: 1<br/>fsp3Csp2N5B: 1<br/>N_H_2B: 5<br/>fsp2Osp2C5B: 6<br/>da_lipo_5B: 18<br/>fringNC6B: 2<br/>fOringC6B: 1</p> | <p>315 2008545</p>  <p>IC50(nM):0.4<br/>fringNplaN4B: 2<br/>fsp3Csp2N5B: 1<br/>N_H_2B: 6<br/>fsp2Osp2C5B: 5<br/>da_lipo_5B: 14<br/>fringNC6B: 2<br/>fOringC6B: 1</p> |

|                                                                                                                                                                                                                                                                 |                                                                                                                                                                                                                                                                 |                                                                                                                                                                                                                                                                   |
|-----------------------------------------------------------------------------------------------------------------------------------------------------------------------------------------------------------------------------------------------------------------|-----------------------------------------------------------------------------------------------------------------------------------------------------------------------------------------------------------------------------------------------------------------|-------------------------------------------------------------------------------------------------------------------------------------------------------------------------------------------------------------------------------------------------------------------|
| <p>316 2008553</p> 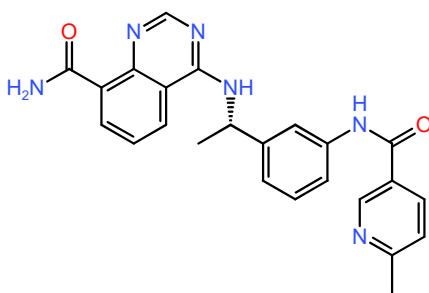 <p>IC50(nM): 0.32<br/> fringNplaN4B: 2<br/> fsp3Csp2N5B: 1<br/> N_H_2B: 6<br/> fsp2Osp2C5B: 6<br/> da_lipo_5B: 14<br/> fringNC6B: 2<br/> fOringC6B: 1</p>  | <p>317 2008558</p>  <p>IC50(nM): 0.69<br/> fringNplaN4B: 1<br/> fsp3Csp2N5B: 1<br/> N_H_2B: 5<br/> fsp2Osp2C5B: 6<br/> da_lipo_5B: 17<br/> fringNC6B: 2<br/> fOringC6B: 1</p> | <p>318 2008572</p>  <p>IC50(nM): 0.89<br/> fringNplaN4B: 1<br/> fsp3Csp2N5B: 1<br/> N_H_2B: 5<br/> fsp2Osp2C5B: 6<br/> da_lipo_5B: 15<br/> fringNC6B: 2<br/> fOringC6B: 1</p>  |
| <p>319 2008590</p>  <p>IC50(nM): 3.1<br/> fringNplaN4B: 1<br/> fsp3Csp2N5B: 1<br/> N_H_2B: 5<br/> fsp2Osp2C5B: 6<br/> da_lipo_5B: 18<br/> fringNC6B: 2<br/> fOringC6B: 0</p>   | <p>320 2013489</p>  <p>IC50(nM): 2.4<br/> fringNplaN4B: 1<br/> fsp3Csp2N5B: 1<br/> N_H_2B: 5<br/> fsp2Osp2C5B: 6<br/> da_lipo_5B: 17<br/> fringNC6B: 2<br/> fOringC6B: 1</p>  | <p>321 2013493</p>  <p>IC50(nM): 2.1<br/> fringNplaN4B: 1<br/> fsp3Csp2N5B: 1<br/> N_H_2B: 7<br/> fsp2Osp2C5B: 5<br/> da_lipo_5B: 13<br/> fringNC6B: 2<br/> fOringC6B: 3</p>   |
| <p>322 2013494</p>  <p>IC50(nM): 7.8<br/> fringNplaN4B: 1<br/> fsp3Csp2N5B: 1<br/> N_H_2B: 6<br/> fsp2Osp2C5B: 5<br/> da_lipo_5B: 18<br/> fringNC6B: 2<br/> fOringC6B: 1</p> | <p>323 2013512</p>  <p>IC50(nM): 13<br/> fringNplaN4B: 1<br/> fsp3Csp2N5B: 1<br/> N_H_2B: 5<br/> fsp2Osp2C5B: 6<br/> da_lipo_5B: 16<br/> fringNC6B: 2<br/> fOringC6B: 1</p> | <p>324 2013513</p>  <p>IC50(nM): 3.5<br/> fringNplaN4B: 1<br/> fsp3Csp2N5B: 1<br/> N_H_2B: 7<br/> fsp2Osp2C5B: 5<br/> da_lipo_5B: 13<br/> fringNC6B: 3<br/> fOringC6B: 1</p> |

|                                                                                                                                                                                                                                                                |                                                                                                                                                                                                                                                                   |                                                                                                                                                                                                                                                                    |
|----------------------------------------------------------------------------------------------------------------------------------------------------------------------------------------------------------------------------------------------------------------|-------------------------------------------------------------------------------------------------------------------------------------------------------------------------------------------------------------------------------------------------------------------|--------------------------------------------------------------------------------------------------------------------------------------------------------------------------------------------------------------------------------------------------------------------|
| <p>325 2013519</p> 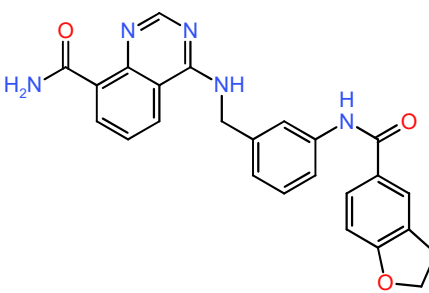 <p>IC50(nM): 0.46<br/> fringNplaN4B: 1<br/> fsp3Csp2N5B: 1<br/> N_H_2B: 5<br/> fsp2Osp2C5B: 6<br/> da_lipo_5B: 16<br/> fringNC6B: 2<br/> fOringC6B: 1</p> | <p>326 2013522</p>  <p>IC50(nM): 0.27<br/> fringNplaN4B: 1<br/> fsp3Csp2N5B: 1<br/> N_H_2B: 7<br/> fsp2Osp2C5B: 5<br/> da_lipo_5B: 15<br/> fringNC6B: 1<br/> fOringC6B: 1</p>   | <p>327 2013523</p>  <p>IC50(nM): 0.58<br/> fringNplaN4B: 1<br/> fsp3Csp2N5B: 1<br/> N_H_2B: 6<br/> fsp2Osp2C5B: 5<br/> da_lipo_5B: 14<br/> fringNC6B: 1<br/> fOringC6B: 1</p>   |
| <p>328 2013531</p>  <p>IC50(nM): 3<br/> fringNplaN4B: 1<br/> fsp3Csp2N5B: 1<br/> N_H_2B: 5<br/> fsp2Osp2C5B: 3<br/> da_lipo_5B: 16<br/> fringNC6B: 2<br/> fOringC6B: 1</p>    | <p>329 2013538</p>  <p>IC50(nM): 2.3<br/> fringNplaN4B: 1<br/> fsp3Csp2N5B: 1<br/> N_H_2B: 6<br/> fsp2Osp2C5B: 4<br/> da_lipo_5B: 14<br/> fringNC6B: 2<br/> fOringC6B: 1</p>    | <p>330 2013548</p>  <p>IC50(nM): 0.57<br/> fringNplaN4B: 1<br/> fsp3Csp2N5B: 1<br/> N_H_2B: 5<br/> fsp2Osp2C5B: 6<br/> da_lipo_5B: 17<br/> fringNC6B: 2<br/> fOringC6B: 1</p>   |
| <p>331 2013553</p>  <p>IC50(nM): 13<br/> fringNplaN4B: 1<br/> fsp3Csp2N5B: 1<br/> N_H_2B: 6<br/> fsp2Osp2C5B: 6<br/> da_lipo_5B: 15<br/> fringNC6B: 2<br/> fOringC6B: 1</p> | <p>332 2013557</p>  <p>IC50(nM): 0.51<br/> fringNplaN4B: 1<br/> fsp3Csp2N5B: 1<br/> N_H_2B: 7<br/> fsp2Osp2C5B: 5<br/> da_lipo_5B: 15<br/> fringNC6B: 1<br/> fOringC6B: 1</p> | <p>333 2013562</p>  <p>IC50(nM): 0.41<br/> fringNplaN4B: 1<br/> fsp3Csp2N5B: 1<br/> N_H_2B: 5<br/> fsp2Osp2C5B: 6<br/> da_lipo_5B: 17<br/> fringNC6B: 2<br/> fOringC6B: 1</p> |

|                                                                                                                                                                                                                                                                 |                                                                                                                                                                                                                                                                 |                                                                                                                                                                                                                                                                  |
|-----------------------------------------------------------------------------------------------------------------------------------------------------------------------------------------------------------------------------------------------------------------|-----------------------------------------------------------------------------------------------------------------------------------------------------------------------------------------------------------------------------------------------------------------|------------------------------------------------------------------------------------------------------------------------------------------------------------------------------------------------------------------------------------------------------------------|
| <p>334 2013566</p> 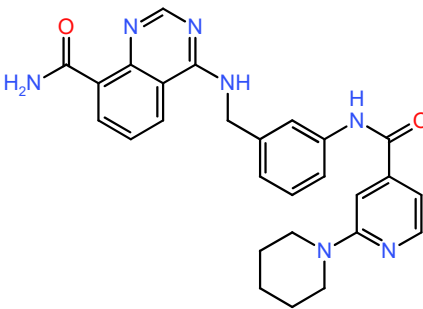 <p>IC50(nM): 2.3<br/> fringNplaN4B: 1<br/> fsp3Csp2N5B: 1<br/> N_H_2B: 7<br/> fsp2Osp2C5B: 5<br/> da_lipo_5B: 13<br/> fringNC6B: 2<br/> fOringC6B: 3</p>   | <p>335 2013576</p>  <p>IC50(nM): 0.94<br/> fringNplaN4B: 1<br/> fsp3Csp2N5B: 1<br/> N_H_2B: 5<br/> fsp2Osp2C5B: 5<br/> da_lipo_5B: 18<br/> fringNC6B: 2<br/> fOringC6B: 1</p> | <p>336 2013578</p>  <p>IC50(nM): 1<br/> fringNplaN4B: 1<br/> fsp3Csp2N5B: 1<br/> N_H_2B: 6<br/> fsp2Osp2C5B: 6<br/> da_lipo_5B: 16<br/> fringNC6B: 2<br/> fOringC6B: 1</p>    |
| <p>337 2013582</p>  <p>IC50(nM): 2.1<br/> fringNplaN4B: 1<br/> fsp3Csp2N5B: 1<br/> N_H_2B: 6<br/> fsp2Osp2C5B: 5<br/> da_lipo_5B: 14<br/> fringNC6B: 2<br/> fOringC6B: 1</p>   | <p>338 2013602</p>  <p>IC50(nM): 0.94<br/> fringNplaN4B: 1<br/> fsp3Csp2N5B: 1<br/> N_H_2B: 5<br/> fsp2Osp2C5B: 6<br/> da_lipo_5B: 16<br/> fringNC6B: 2<br/> fOringC6B: 0</p> | <p>339 2013603</p>  <p>IC50(nM): 0.26<br/> fringNplaN4B: 2<br/> fsp3Csp2N5B: 1<br/> N_H_2B: 7<br/> fsp2Osp2C5B: 6<br/> da_lipo_5B: 13<br/> fringNC6B: 2<br/> fOringC6B: 1</p> |
| <p>340 2013612</p>  <p>IC50(nM): 3.6<br/> fringNplaN4B: 1<br/> fsp3Csp2N5B: 1<br/> N_H_2B: 5<br/> fsp2Osp2C5B: 6<br/> da_lipo_5B: 14<br/> fringNC6B: 2<br/> fOringC6B: 1</p> | <p>341 2013621</p>  <p>IC50(nM): 11<br/> fringNplaN4B: 1<br/> fsp3Csp2N5B: 1<br/> N_H_2B: 5<br/> fsp2Osp2C5B: 6<br/> da_lipo_5B: 16<br/> fringNC6B: 3<br/> fOringC6B: 1</p> | <p>342 2013624</p>  <p>IC50(nM): 16<br/> fringNplaN4B: 1<br/> fsp3Csp2N5B: 1<br/> N_H_2B: 5<br/> fsp2Osp2C5B: 3<br/> da_lipo_5B: 13<br/> fringNC6B: 1<br/> fOringC6B: 0</p> |

|                                                                                                                                                                                                                                                          |                                                                                                                                                                                                                                                          |                                                                                                                                                                                                                                                          |
|----------------------------------------------------------------------------------------------------------------------------------------------------------------------------------------------------------------------------------------------------------|----------------------------------------------------------------------------------------------------------------------------------------------------------------------------------------------------------------------------------------------------------|----------------------------------------------------------------------------------------------------------------------------------------------------------------------------------------------------------------------------------------------------------|
| <p>343 2013625</p> 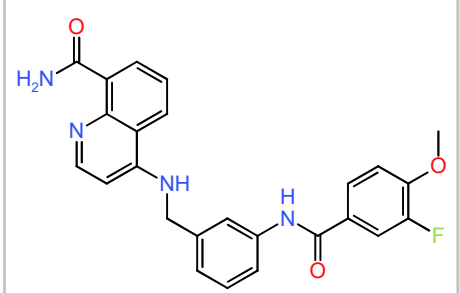 <p>IC50(nM):0.5<br/>fringNplaN4B: 2<br/>fsp3Csp2N5B: 1<br/>N_H_2B: 4<br/>fsp2Osp2C5B: 6<br/>da_lipo_5B: 17<br/>fringNC6B: 1<br/>fOringC6B: 2</p>    | <p>344 2013626</p>  <p>IC50(nM):20<br/>fringNplaN4B: 1<br/>fsp3Csp2N5B: 1<br/>N_H_2B: 7<br/>fsp2Osp2C5B: 5<br/>da_lipo_5B: 13<br/>fringNC6B: 3<br/>fOringC6B: 1</p>    | <p>345 2013634</p>  <p>IC50(nM):2.5<br/>fringNplaN4B: 1<br/>fsp3Csp2N5B: 0<br/>N_H_2B: 6<br/>fsp2Osp2C5B: 6<br/>da_lipo_5B: 17<br/>fringNC6B: 2<br/>fOringC6B: 1</p>  |
| <p>346 2013635</p>  <p>IC50(nM):1.8<br/>fringNplaN4B: 1<br/>fsp3Csp2N5B: 1<br/>N_H_2B: 5<br/>fsp2Osp2C5B: 6<br/>da_lipo_5B: 16<br/>fringNC6B: 2<br/>fOringC6B: 1</p>   | <p>347 2013645</p>  <p>IC50(nM):0.94<br/>fringNplaN4B: 1<br/>fsp3Csp2N5B: 1<br/>N_H_2B: 6<br/>fsp2Osp2C5B: 3<br/>da_lipo_5B: 13<br/>fringNC6B: 0<br/>fOringC6B: 0</p> | <p>348 2013651</p>  <p>IC50(nM): 1<br/>fringNplaN4B: 1<br/>fsp3Csp2N5B: 1<br/>N_H_2B: 6<br/>fsp2Osp2C5B: 3<br/>da_lipo_5B: 12<br/>fringNC6B: 0<br/>fOringC6B: 0</p>  |
| <p>349 2013653</p>  <p>IC50(nM):0.38<br/>fringNplaN4B: 1<br/>fsp3Csp2N5B: 1<br/>N_H_2B: 5<br/>fsp2Osp2C5B: 6<br/>da_lipo_5B: 16<br/>fringNC6B: 2<br/>fOringC6B: 0</p> | <p>350 2013657</p>  <p>IC50(nM):0.3<br/>fringNplaN4B: 1<br/>fsp3Csp2N5B: 1<br/>N_H_2B: 7<br/>fsp2Osp2C5B: 5<br/>da_lipo_5B: 15<br/>fringNC6B: 1<br/>fOringC6B: 2</p> | <p>351 2013659</p>  <p>IC50(nM): 1<br/>fringNplaN4B: 1<br/>fsp3Csp2N5B: 1<br/>N_H_2B: 7<br/>fsp2Osp2C5B: 6<br/>da_lipo_5B: 16<br/>fringNC6B: 3<br/>fOringC6B: 2</p> |

|                                                                                                                                                                                                                                                                |                                                                                                                                                                                                                                                                |                                                                                                                                                                                                                                                                  |
|----------------------------------------------------------------------------------------------------------------------------------------------------------------------------------------------------------------------------------------------------------------|----------------------------------------------------------------------------------------------------------------------------------------------------------------------------------------------------------------------------------------------------------------|------------------------------------------------------------------------------------------------------------------------------------------------------------------------------------------------------------------------------------------------------------------|
| <p>352 2013660</p> 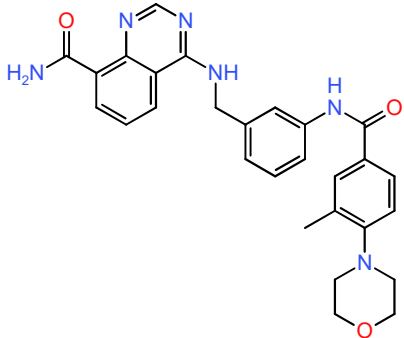 <p>IC50(nM):2.2<br/> fringNplaN4B: 1<br/> fsp3Csp2N5B: 1<br/> N_H_2B: 6<br/> fsp2Osp2C5B: 6<br/> da_lipo_5B: 16<br/> fringNC6B: 2<br/> fOringC6B: 1</p>   | <p>353 2013670</p>  <p>IC50(nM):0.96<br/> fringNplaN4B: 1<br/> fsp3Csp2N5B: 1<br/> N_H_2B: 5<br/> fsp2Osp2C5B: 6<br/> da_lipo_5B: 15<br/> fringNC6B: 2<br/> fOringC6B: 1</p> | <p>354 2013674</p>  <p>IC50(nM):0.73<br/> fringNplaN4B: 1<br/> fsp3Csp2N5B: 1<br/> N_H_2B: 5<br/> fsp2Osp2C5B: 6<br/> da_lipo_5B: 16<br/> fringNC6B: 2<br/> fOringC6B: 1</p>  |
| <p>355 2013675</p>  <p>IC50(nM):0.39<br/> fringNplaN4B: 1<br/> fsp3Csp2N5B: 1<br/> N_H_2B: 6<br/> fsp2Osp2C5B: 3<br/> da_lipo_5B: 14<br/> fringNC6B: 0<br/> fOringC6B: 0</p>  | <p>356 2013677</p>  <p>IC50(nM):6.5<br/> fringNplaN4B: 1<br/> fsp3Csp2N5B: 1<br/> N_H_2B: 5<br/> fsp2Osp2C5B: 5<br/> da_lipo_5B: 17<br/> fringNC6B: 2<br/> fOringC6B: 1</p>  | <p>357 2013680</p>  <p>IC50(nM):0.76<br/> fringNplaN4B: 1<br/> fsp3Csp2N5B: 1<br/> N_H_2B: 6<br/> fsp2Osp2C5B: 3<br/> da_lipo_5B: 14<br/> fringNC6B: 0<br/> fOringC6B: 0</p>  |
| <p>358 2013681</p>  <p>IC50(nM):4.7<br/> fringNplaN4B: 1<br/> fsp3Csp2N5B: 1<br/> N_H_2B: 7<br/> fsp2Osp2C5B: 6<br/> da_lipo_5B: 14<br/> fringNC6B: 2<br/> fOringC6B: 2</p> | <p>359 2013687</p>  <p>IC50(nM):17<br/> fringNplaN4B: 1<br/> fsp3Csp2N5B: 1<br/> N_H_2B: 5<br/> fsp2Osp2C5B: 5<br/> da_lipo_5B: 15<br/> fringNC6B: 2<br/> fOringC6B: 1</p> | <p>360 2013689</p>  <p>IC50(nM):9.4<br/> fringNplaN4B: 1<br/> fsp3Csp2N5B: 1<br/> N_H_2B: 5<br/> fsp2Osp2C5B: 4<br/> da_lipo_5B: 19<br/> fringNC6B: 2<br/> fOringC6B: 1</p> |



|                                                                                                                                                                                                                                                                  |                                                                                                                                                                                                                                                                  |                                                                                                                                                                                                                                                                   |
|------------------------------------------------------------------------------------------------------------------------------------------------------------------------------------------------------------------------------------------------------------------|------------------------------------------------------------------------------------------------------------------------------------------------------------------------------------------------------------------------------------------------------------------|-------------------------------------------------------------------------------------------------------------------------------------------------------------------------------------------------------------------------------------------------------------------|
| <p>361 2013690</p> 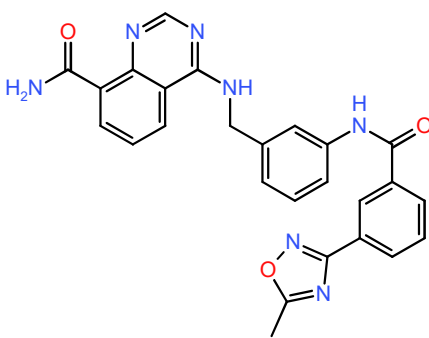 <p>IC50(nM): 0.5<br/> fringNplaN4B: 1<br/> fsp3Csp2N5B: 1<br/> N_H_2B: 5<br/> fsp2Osp2C5B: 7<br/> da_lipo_5B: 16<br/> fringNC6B: 2<br/> fOringC6B: 1</p>    | <p>362 2013691</p>  <p>IC50(nM): 0.5<br/> fringNplaN4B: 1<br/> fsp3Csp2N5B: 1<br/> N_H_2B: 5<br/> fsp2Osp2C5B: 5<br/> da_lipo_5B: 18<br/> fringNC6B: 2<br/> fOringC6B: 1</p>   | <p>363 2013692</p>  <p>IC50(nM): 15<br/> fringNplaN4B: 1<br/> fsp3Csp2N5B: 1<br/> N_H_2B: 5<br/> fsp2Osp2C5B: 5<br/> da_lipo_5B: 18<br/> fringNC6B: 2<br/> fOringC6B: 1</p>    |
| <p>364 2013693</p>  <p>IC50(nM): 5.5<br/> fringNplaN4B: 1<br/> fsp3Csp2N5B: 1<br/> N_H_2B: 6<br/> fsp2Osp2C5B: 6<br/> da_lipo_5B: 15<br/> fringNC6B: 2<br/> fOringC6B: 1</p>    | <p>365 2013700</p>  <p>IC50(nM): 16<br/> fringNplaN4B: 1<br/> fsp3Csp2N5B: 1<br/> N_H_2B: 5<br/> fsp2Osp2C5B: 3<br/> da_lipo_5B: 15<br/> fringNC6B: 1<br/> fOringC6B: 0</p>    | <p>366 2013701</p>  <p>IC50(nM): 2.5<br/> fringNplaN4B: 1<br/> fsp3Csp2N5B: 1<br/> N_H_2B: 5<br/> fsp2Osp2C5B: 3<br/> da_lipo_5B: 16<br/> fringNC6B: 0<br/> fOringC6B: 0</p>   |
| <p>367 2013703</p>  <p>IC50(nM): 0.54<br/> fringNplaN4B: 1<br/> fsp3Csp2N5B: 1<br/> N_H_2B: 5<br/> fsp2Osp2C5B: 5<br/> da_lipo_5B: 17<br/> fringNC6B: 2<br/> fOringC6B: 1</p> | <p>368 2013705</p>  <p>IC50(nM): 6.8<br/> fringNplaN4B: 2<br/> fsp3Csp2N5B: 1<br/> N_H_2B: 5<br/> fsp2Osp2C5B: 5<br/> da_lipo_5B: 14<br/> fringNC6B: 2<br/> fOringC6B: 1</p> | <p>369 2013706</p>  <p>IC50(nM): 4.2<br/> fringNplaN4B: 1<br/> fsp3Csp2N5B: 1<br/> N_H_2B: 5<br/> fsp2Osp2C5B: 5<br/> da_lipo_5B: 16<br/> fringNC6B: 2<br/> fOringC6B: 1</p> |

|                                                                                                                                                                                                                                                          |                                                                                                                                                                                                                                                           |                                                                                                                                                                                                                                                           |
|----------------------------------------------------------------------------------------------------------------------------------------------------------------------------------------------------------------------------------------------------------|-----------------------------------------------------------------------------------------------------------------------------------------------------------------------------------------------------------------------------------------------------------|-----------------------------------------------------------------------------------------------------------------------------------------------------------------------------------------------------------------------------------------------------------|
| <p>370 2013709</p> 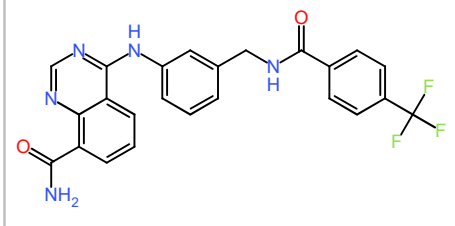 <p>IC50(nM):4.7<br/>fringNplaN4B: 1<br/>fsp3Csp2N5B: 0<br/>N_H_2B: 5<br/>fsp2Osp2C5B: 6<br/>da_lipo_5B: 16<br/>fringNC6B: 2<br/>fOringC6B: 2</p>    | <p>371 2018350</p>  <p>IC50(nM): 8.9<br/>fringNplaN4B: 1<br/>fsp3Csp2N5B: 1<br/>N_H_2B: 6<br/>fsp2Osp2C5B: 4<br/>da_lipo_5B: 13<br/>fringNC6B: 2<br/>fOringC6B: 1</p>   | <p>372 2018352</p>  <p>IC50(nM): 18<br/>fringNplaN4B: 1<br/>fsp3Csp2N5B: 1<br/>N_H_2B: 5<br/>fsp2Osp2C5B: 6<br/>da_lipo_5B: 15<br/>fringNC6B: 2<br/>fOringC6B: 1</p>   |
| <p>373 2018360</p>  <p>IC50(nM): 1.6<br/>fringNplaN4B: 2<br/>fsp3Csp2N5B: 1<br/>N_H_2B: 8<br/>fsp2Osp2C5B: 5<br/>da_lipo_5B: 11<br/>fringNC6B: 2<br/>fOringC6B: 2</p>   | <p>374 2018361</p>  <p>IC50(nM): 32<br/>fringNplaN4B: 1<br/>fsp3Csp2N5B: 1<br/>N_H_2B: 5<br/>fsp2Osp2C5B: 6<br/>da_lipo_5B: 16<br/>fringNC6B: 3<br/>fOringC6B: 1</p>    | <p>375 2018362</p>  <p>IC50(nM): 3.3<br/>fringNplaN4B: 1<br/>fsp3Csp2N5B: 1<br/>N_H_2B: 7<br/>fsp2Osp2C5B: 3<br/>da_lipo_5B: 11<br/>fringNC6B: 0<br/>fOringC6B: 0</p>  |
| <p>376 2018364</p>  <p>IC50(nM): 1.5<br/>fringNplaN4B: 1<br/>fsp3Csp2N5B: 1<br/>N_H_2B: 7<br/>fsp2Osp2C5B: 3<br/>da_lipo_5B: 14<br/>fringNC6B: 0<br/>fOringC6B: 0</p> | <p>377 2018365</p>  <p>IC50(nM): 4.4<br/>fringNplaN4B: 1<br/>fsp3Csp2N5B: 1<br/>N_H_2B: 6<br/>fsp2Osp2C5B: 7<br/>da_lipo_5B: 12<br/>fringNC6B: 1<br/>fOringC6B: 1</p> | <p>378 2018366</p>  <p>IC50(nM): 20<br/>fringNplaN4B: 1<br/>fsp3Csp2N5B: 1<br/>N_H_2B: 5<br/>fsp2Osp2C5B: 6<br/>da_lipo_5B: 16<br/>fringNC6B: 1<br/>fOringC6B: 2</p> |

|                                                                                                                                                                                                                                                          |                                                                                                                                                                                                                                                           |                                                                                                                                                                                                                                                            |
|----------------------------------------------------------------------------------------------------------------------------------------------------------------------------------------------------------------------------------------------------------|-----------------------------------------------------------------------------------------------------------------------------------------------------------------------------------------------------------------------------------------------------------|------------------------------------------------------------------------------------------------------------------------------------------------------------------------------------------------------------------------------------------------------------|
| <p>379 2018367</p> 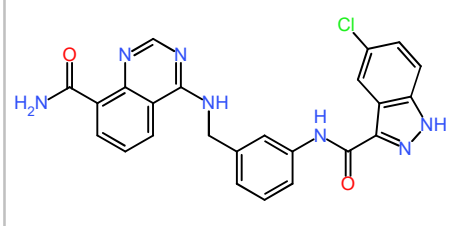 <p>IC50(nM):5<br/>fringNplaN4B: 1<br/>fsp3Csp2N5B: 1<br/>N_H_2B: 7<br/>fsp2Osp2C5B: 7<br/>da_lipo_5B: 16<br/>fringNC6B: 1<br/>fOringC6B: 2</p>      | <p>380 2018371</p>  <p>IC50(nM):5<br/>fringNplaN4B: 1<br/>fsp3Csp2N5B: 1<br/>N_H_2B: 7<br/>fsp2Osp2C5B: 3<br/>da_lipo_5B: 14<br/>fringNC6B: 0<br/>fOringC6B: 0</p>      | <p>381 2018372</p>  <p>IC50(nM): 1.9<br/>fringNplaN4B: 1<br/>fsp3Csp2N5B: 0<br/>N_H_2B: 6<br/>fsp2Osp2C5B: 5<br/>da_lipo_5B: 13<br/>fringNC6B: 2<br/>fOringC6B: 1</p>   |
| <p>382 2018382</p>  <p>IC50(nM): 8.7<br/>fringNplaN4B: 1<br/>fsp3Csp2N5B: 0<br/>N_H_2B: 5<br/>fsp2Osp2C5B: 6<br/>da_lipo_5B: 14<br/>fringNC6B: 2<br/>fOringC6B: 2</p>  | <p>383 2018387</p>  <p>IC50(nM): 0.33<br/>fringNplaN4B: 1<br/>fsp3Csp2N5B: 1<br/>N_H_2B: 7<br/>fsp2Osp2C5B: 5<br/>da_lipo_5B: 14<br/>fringNC6B: 1<br/>fOringC6B: 1</p> | <p>384 2018388</p>  <p>IC50(nM): 15<br/>fringNplaN4B: 1<br/>fsp3Csp2N5B: 1<br/>N_H_2B: 6<br/>fsp2Osp2C5B: 6<br/>da_lipo_5B: 15<br/>fringNC6B: 2<br/>fOringC6B: 1</p>   |
| <p>385 2018390</p>  <p>IC50(nM): 2.3<br/>fringNplaN4B: 1<br/>fsp3Csp2N5B: 1<br/>N_H_2B: 7<br/>fsp2Osp2C5B: 5<br/>da_lipo_5B: 12<br/>fringNC6B: 1<br/>fOringC6B: 1</p> | <p>386 2018391</p>  <p>IC50(nM): 1.2<br/>fringNplaN4B: 1<br/>fsp3Csp2N5B: 1<br/>N_H_2B: 5<br/>fsp2Osp2C5B: 6<br/>da_lipo_5B: 17<br/>fringNC6B: 2<br/>fOringC6B: 1</p> | <p>387 2018392</p>  <p>IC50(nM): 1.7<br/>fringNplaN4B: 1<br/>fsp3Csp2N5B: 0<br/>N_H_2B: 6<br/>fsp2Osp2C5B: 6<br/>da_lipo_5B: 15<br/>fringNC6B: 2<br/>fOringC6B: 1</p> |

|                                                                                                                                                                                                                                                           |                                                                                                                                                                                                                                                          |                                                                                                                                                                                                                                                            |
|-----------------------------------------------------------------------------------------------------------------------------------------------------------------------------------------------------------------------------------------------------------|----------------------------------------------------------------------------------------------------------------------------------------------------------------------------------------------------------------------------------------------------------|------------------------------------------------------------------------------------------------------------------------------------------------------------------------------------------------------------------------------------------------------------|
| <p>388 2018396</p> 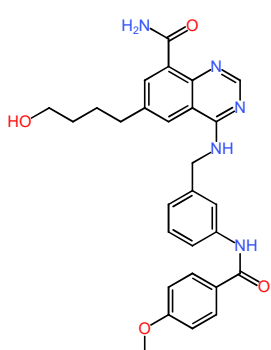 <p>IC50(nM): 12<br/>fringNplaN4B: 1<br/>fsp3Csp2N5B: 1<br/>N_H_2B: 5<br/>fsp2Osp2C5B: 6<br/>da_lipo_5B: 18<br/>fringNC6B: 3<br/>fOringC6B: 1</p>     | <p>389 2018397</p>  <p>IC50(nM): 1.8<br/>fringNplaN4B: 1<br/>fsp3Csp2N5B: 1<br/>N_H_2B: 5<br/>fsp2Osp2C5B: 6<br/>da_lipo_5B: 15<br/>fringNC6B: 2<br/>fOringC6B: 1</p>   | <p>390 2018398</p>  <p>IC50(nM): 1.1<br/>fringNplaN4B: 1<br/>fsp3Csp2N5B: 1<br/>N_H_2B: 5<br/>fsp2Osp2C5B: 5<br/>da_lipo_5B: 16<br/>fringNC6B: 2<br/>fOringC6B: 1</p>   |
| <p>391 2018399</p>  <p>IC50(nM): 0.5<br/>fringNplaN4B: 1<br/>fsp3Csp2N5B: 1<br/>N_H_2B: 6<br/>fsp2Osp2C5B: 5<br/>da_lipo_5B: 16<br/>fringNC6B: 2<br/>fOringC6B: 1</p>    | <p>392 2018401</p>  <p>IC50(nM): 0.38<br/>fringNplaN4B: 2<br/>fsp3Csp2N5B: 1<br/>N_H_2B: 6<br/>fsp2Osp2C5B: 6<br/>da_lipo_5B: 13<br/>fringNC6B: 2<br/>fOringC6B: 1</p> | <p>393 2018402</p>  <p>IC50(nM): 0.79<br/>fringNplaN4B: 1<br/>fsp3Csp2N5B: 1<br/>N_H_2B: 5<br/>fsp2Osp2C5B: 6<br/>da_lipo_5B: 17<br/>fringNC6B: 2<br/>fOringC6B: 1</p>  |
| <p>394 2018403</p>  <p>IC50(nM): 0.38<br/>fringNplaN4B: 1<br/>fsp3Csp2N5B: 1<br/>N_H_2B: 5<br/>fsp2Osp2C5B: 6<br/>da_lipo_5B: 17<br/>fringNC6B: 2<br/>fOringC6B: 1</p> | <p>395 2018404</p>  <p>IC50(nM): 13<br/>fringNplaN4B: 1<br/>fsp3Csp2N5B: 1<br/>N_H_2B: 5<br/>fsp2Osp2C5B: 6<br/>da_lipo_5B: 15<br/>fringNC6B: 2<br/>fOringC6B: 1</p>  | <p>396 2018405</p>  <p>IC50(nM): 1.6<br/>fringNplaN4B: 2<br/>fsp3Csp2N5B: 1<br/>N_H_2B: 6<br/>fsp2Osp2C5B: 5<br/>da_lipo_5B: 13<br/>fringNC6B: 2<br/>fOringC6B: 1</p> |

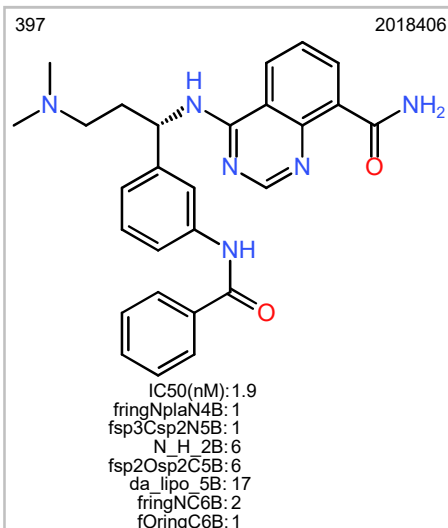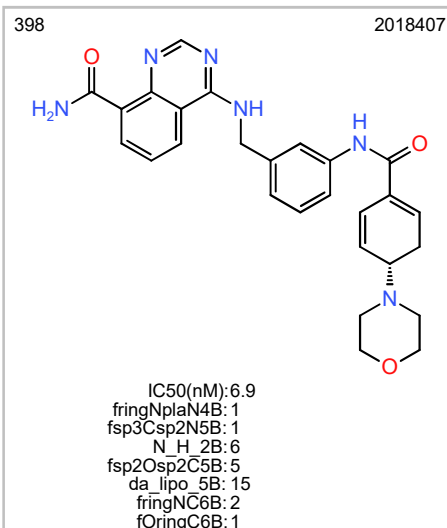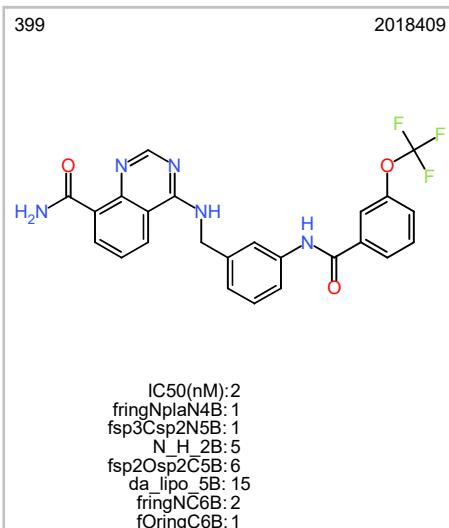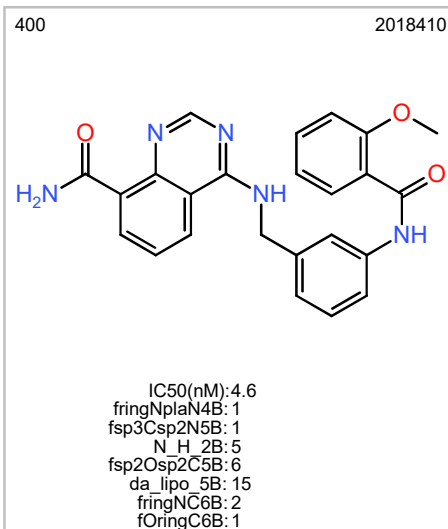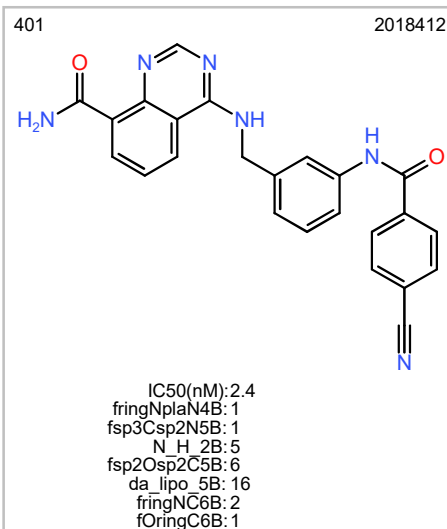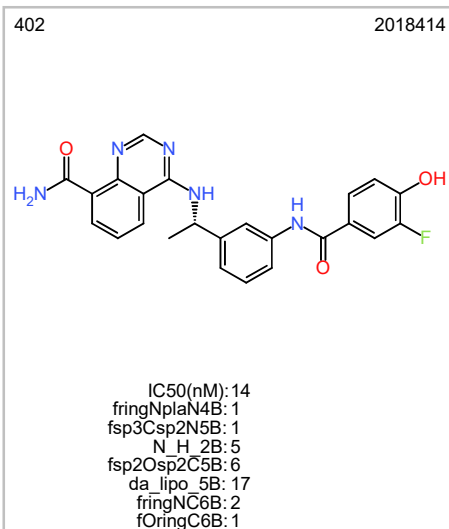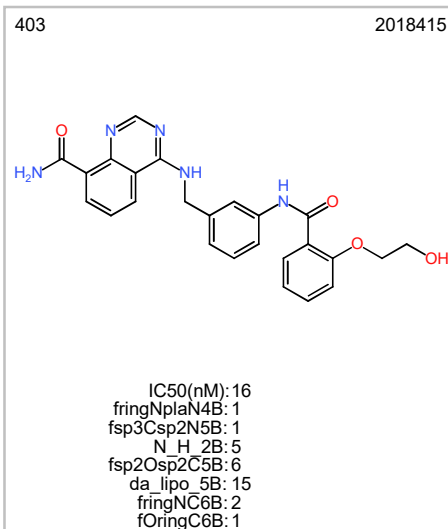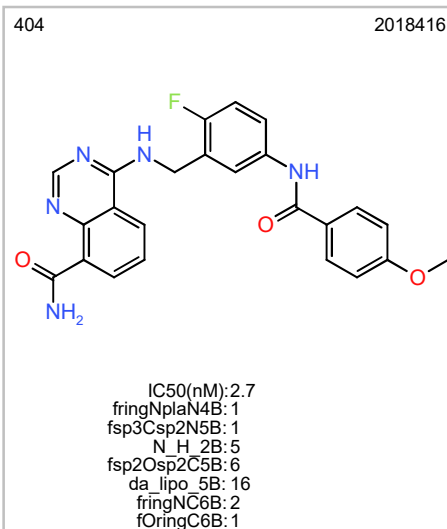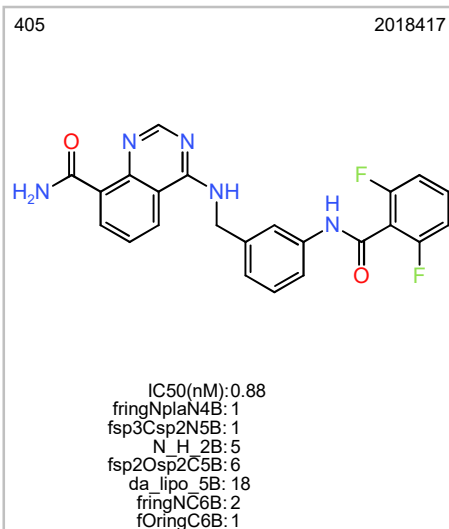

|                                                                                                                                                                                                                                                                 |                                                                                                                                                                                                                                                                  |                                                                                                                                                                                                                                                                    |
|-----------------------------------------------------------------------------------------------------------------------------------------------------------------------------------------------------------------------------------------------------------------|------------------------------------------------------------------------------------------------------------------------------------------------------------------------------------------------------------------------------------------------------------------|--------------------------------------------------------------------------------------------------------------------------------------------------------------------------------------------------------------------------------------------------------------------|
| <p>406 2018418</p> 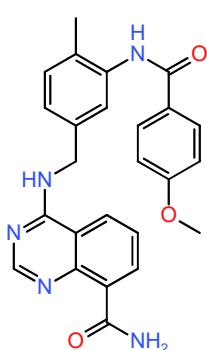 <p>IC50(nM): 0.8<br/> fringNplaN4B: 1<br/> fsp3Csp2N5B: 1<br/> N_H_2B: 5<br/> fsp2Osp2C5B: 6<br/> da_lipo_5B: 16<br/> fringNC6B: 2<br/> fOringC6B: 1</p>   | <p>407 2018419</p>  <p>IC50(nM): 0.62<br/> fringNplaN4B: 1<br/> fsp3Csp2N5B: 1<br/> N_H_2B: 6<br/> fsp2Osp2C5B: 6<br/> da_lipo_5B: 17<br/> fringNC6B: 2<br/> fOringC6B: 1</p>   | <p>408 2018423</p>  <p>IC50(nM): 0.52<br/> fringNplaN4B: 1<br/> fsp3Csp2N5B: 1<br/> N_H_2B: 5<br/> fsp2Osp2C5B: 6<br/> da_lipo_5B: 17<br/> fringNC6B: 2<br/> fOringC6B: 1</p>   |
| <p>409 2018425</p>  <p>IC50(nM): 7.6<br/> fringNplaN4B: 1<br/> fsp3Csp2N5B: 1<br/> N_H_2B: 5<br/> fsp2Osp2C5B: 6<br/> da_lipo_5B: 16<br/> fringNC6B: 2<br/> fOringC6B: 0</p>   | <p>410 2018430</p>  <p>IC50(nM): 9.8<br/> fringNplaN4B: 1<br/> fsp3Csp2N5B: 1<br/> N_H_2B: 5<br/> fsp2Osp2C5B: 6<br/> da_lipo_5B: 14<br/> fringNC6B: 2<br/> fOringC6B: 1</p>   | <p>411 2018431</p>  <p>IC50(nM): 2<br/> fringNplaN4B: 1<br/> fsp3Csp2N5B: 1<br/> N_H_2B: 5<br/> fsp2Osp2C5B: 6<br/> da_lipo_5B: 17<br/> fringNC6B: 2<br/> fOringC6B: 1</p>      |
| <p>412 2018436</p>  <p>IC50(nM): 3.3<br/> fringNplaN4B: 1<br/> fsp3Csp2N5B: 1<br/> N_H_2B: 6<br/> fsp2Osp2C5B: 6<br/> da_lipo_5B: 17<br/> fringNC6B: 3<br/> fOringC6B: 1</p> | <p>413 2018438</p>  <p>IC50(nM): 1.8<br/> fringNplaN4B: 1<br/> fsp3Csp2N5B: 1<br/> N_H_2B: 5<br/> fsp2Osp2C5B: 6<br/> da_lipo_5B: 16<br/> fringNC6B: 2<br/> fOringC6B: 1</p> | <p>414 2018444</p>  <p>IC50(nM): 0.81<br/> fringNplaN4B: 2<br/> fsp3Csp2N5B: 1<br/> N_H_2B: 7<br/> fsp2Osp2C5B: 6<br/> da_lipo_5B: 13<br/> fringNC6B: 2<br/> fOringC6B: 1</p> |

|                                                                                                                                                                                                                                                                 |                                                                                                                                                                                                                                                                  |                                                                                                                                                                                                                                                                   |
|-----------------------------------------------------------------------------------------------------------------------------------------------------------------------------------------------------------------------------------------------------------------|------------------------------------------------------------------------------------------------------------------------------------------------------------------------------------------------------------------------------------------------------------------|-------------------------------------------------------------------------------------------------------------------------------------------------------------------------------------------------------------------------------------------------------------------|
| <p>415 2018460</p> 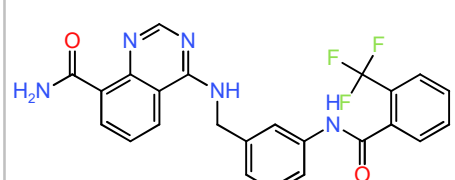 <p>IC50(nM): 3.8<br/> fringNplaN4B: 1<br/> fsp3Csp2N5B: 1<br/> N_H_2B: 5<br/> fsp2Osp2C5B: 6<br/> da_lipo_5B: 20<br/> fringNC6B: 2<br/> fOringC6B: 1</p>   | <p>416 2018468</p>  <p>IC50(nM): 18<br/> fringNplaN4B: 1<br/> fsp3Csp2N5B: 1<br/> N_H_2B: 7<br/> fsp2Osp2C5B: 4<br/> da_lipo_5B: 8<br/> fringNC6B: 0<br/> fOringC6B: 2</p>     | <p>417 2025431</p>  <p>IC50(nM): 180<br/> fringNplaN4B: 0<br/> fsp3Csp2N5B: 0<br/> N_H_2B: 4<br/> fsp2Osp2C5B: 1<br/> da_lipo_5B: 10<br/> fringNC6B: 0<br/> fOringC6B: 2</p>   |
| <p>418 2038679</p>  <p>IC50(nM): 196<br/> fringNplaN4B: 0<br/> fsp3Csp2N5B: 1<br/> N_H_2B: 6<br/> fsp2Osp2C5B: 4<br/> da_lipo_5B: 14<br/> fringNC6B: 2<br/> fOringC6B: 3</p>   | <p>419 2038680</p>  <p>IC50(nM): 278<br/> fringNplaN4B: 0<br/> fsp3Csp2N5B: 1<br/> N_H_2B: 6<br/> fsp2Osp2C5B: 4<br/> da_lipo_5B: 14<br/> fringNC6B: 1<br/> fOringC6B: 5</p>   | <p>420 2038689</p>  <p>IC50(nM): 181<br/> fringNplaN4B: 0<br/> fsp3Csp2N5B: 1<br/> N_H_2B: 6<br/> fsp2Osp2C5B: 2<br/> da_lipo_5B: 13<br/> fringNC6B: 1<br/> fOringC6B: 4</p>   |
| <p>421 2038690</p>  <p>IC50(nM): 176<br/> fringNplaN4B: 0<br/> fsp3Csp2N5B: 1<br/> N_H_2B: 6<br/> fsp2Osp2C5B: 2<br/> da_lipo_5B: 13<br/> fringNC6B: 2<br/> fOringC6B: 2</p> | <p>422 2056426</p>  <p>IC50(nM): 157<br/> fringNplaN4B: 0<br/> fsp3Csp2N5B: 1<br/> N_H_2B: 4<br/> fsp2Osp2C5B: 0<br/> da_lipo_5B: 11<br/> fringNC6B: 1<br/> fOringC6B: 2</p> | <p>423 2056428</p>  <p>IC50(nM): 132<br/> fringNplaN4B: 0<br/> fsp3Csp2N5B: 1<br/> N_H_2B: 4<br/> fsp2Osp2C5B: 0<br/> da_lipo_5B: 10<br/> fringNC6B: 1<br/> fOringC6B: 2</p> |

|                                                                                                                                                                                                                                                                   |                                                                                                                                                                                                                                                                  |                                                                                                                                                                                                                                                                  |
|-------------------------------------------------------------------------------------------------------------------------------------------------------------------------------------------------------------------------------------------------------------------|------------------------------------------------------------------------------------------------------------------------------------------------------------------------------------------------------------------------------------------------------------------|------------------------------------------------------------------------------------------------------------------------------------------------------------------------------------------------------------------------------------------------------------------|
| <p>424 2079522</p> 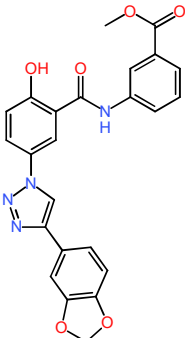 <p>IC50(nM): 1108<br/> fringNplaN4B: 0<br/> fsp3Csp2N5B: 0<br/> N_H_2B: 2<br/> fsp2Osp2C5B: 3<br/> da_lipo_5B: 9<br/> fringNC6B: 2<br/> fOringC6B: 0</p>     | <p>425 2097650</p>  <p>IC50(nM): 163<br/> fringNplaN4B: 0<br/> fsp3Csp2N5B: 0<br/> N_H_2B: 3<br/> fsp2Osp2C5B: 3<br/> da_lipo_5B: 14<br/> fringNC6B: 1<br/> fOringC6B: 0</p>   | <p>426 2127354</p>  <p>IC50(nM): 5.93<br/> fringNplaN4B: 0<br/> fsp3Csp2N5B: 0<br/> N_H_2B: 4<br/> fsp2Osp2C5B: 3<br/> da_lipo_5B: 15<br/> fringNC6B: 0<br/> fOringC6B: 0</p> |
| <p>427 2130617</p>  <p>IC50(nM): 12505.05<br/> fringNplaN4B: 0<br/> fsp3Csp2N5B: 0<br/> N_H_2B: 4<br/> fsp2Osp2C5B: 3<br/> da_lipo_5B: 8<br/> fringNC6B: 1<br/> fOringC6B: 4</p> | <p>428 2131546</p>  <p>IC50(nM): 64<br/> fringNplaN4B: 0<br/> fsp3Csp2N5B: 0<br/> N_H_2B: 4<br/> fsp2Osp2C5B: 5<br/> da_lipo_5B: 17<br/> fringNC6B: 1<br/> fOringC6B: 3</p>    | <p>429 2132789</p>  <p>IC50(nM): 8.78<br/> fringNplaN4B: 0<br/> fsp3Csp2N5B: 0<br/> N_H_2B: 4<br/> fsp2Osp2C5B: 3<br/> da_lipo_5B: 12<br/> fringNC6B: 0<br/> fOringC6B: 0</p> |
| <p>430 2138320</p>  <p>IC50(nM): 14<br/> fringNplaN4B: 0<br/> fsp3Csp2N5B: 0<br/> N_H_2B: 4<br/> fsp2Osp2C5B: 3<br/> da_lipo_5B: 17<br/> fringNC6B: 0<br/> fOringC6B: 0</p>    | <p>431 2141733</p>  <p>IC50(nM): 9.36<br/> fringNplaN4B: 0<br/> fsp3Csp2N5B: 0<br/> N_H_2B: 4<br/> fsp2Osp2C5B: 3<br/> da_lipo_5B: 14<br/> fringNC6B: 0<br/> fOringC6B: 0</p> | <p>432 2148736</p>  <p>IC50(nM): 48<br/> fringNplaN4B: 0<br/> fsp3Csp2N5B: 0<br/> N_H_2B: 4<br/> fsp2Osp2C5B: 5<br/> da_lipo_5B: 17<br/> fringNC6B: 1<br/> fOringC6B: 3</p> |



|                                                                                                                                                                                                                                                                |                                                                                                                                                                                                                                                                   |                                                                                                                                                                                                                                                                   |
|----------------------------------------------------------------------------------------------------------------------------------------------------------------------------------------------------------------------------------------------------------------|-------------------------------------------------------------------------------------------------------------------------------------------------------------------------------------------------------------------------------------------------------------------|-------------------------------------------------------------------------------------------------------------------------------------------------------------------------------------------------------------------------------------------------------------------|
| <p>433 2150230</p> 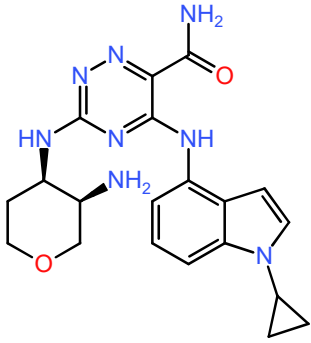 <p>IC50(nM): 1300<br/> fringNplaN4B: 0<br/> fsp3Csp2N5B: 0<br/> N_H_2B: 5<br/> fsp2Osp2C5B: 2<br/> da_lipo_5B: 6<br/> fringNC6B: 0<br/> fOringC6B: 2</p>  | <p>434 2154196</p>  <p>IC50(nM): 24.33<br/> fringNplaN4B: 0<br/> fsp3Csp2N5B: 0<br/> N_H_2B: 4<br/> fsp2Osp2C5B: 3<br/> da_lipo_5B: 14<br/> fringNC6B: 0<br/> fOringC6B: 0</p>   | <p>435 2155241</p>  <p>IC50(nM): 14.2<br/> fringNplaN4B: 0<br/> fsp3Csp2N5B: 1<br/> N_H_2B: 4<br/> fsp2Osp2C5B: 3<br/> da_lipo_5B: 14<br/> fringNC6B: 0<br/> fOringC6B: 0</p>  |
| <p>436 2163348</p>  <p>IC50(nM): 320<br/> fringNplaN4B: 0<br/> fsp3Csp2N5B: 0<br/> N_H_2B: 4<br/> fsp2Osp2C5B: 1<br/> da_lipo_5B: 9<br/> fringNC6B: 0<br/> fOringC6B: 2</p>   | <p>437 2163941</p>  <p>IC50(nM): 19.62<br/> fringNplaN4B: 0<br/> fsp3Csp2N5B: 0<br/> N_H_2B: 4<br/> fsp2Osp2C5B: 3<br/> da_lipo_5B: 15<br/> fringNC6B: 0<br/> fOringC6B: 0</p>  | <p>438 2165875</p>  <p>IC50(nM): 15.21<br/> fringNplaN4B: 0<br/> fsp3Csp2N5B: 0<br/> N_H_2B: 4<br/> fsp2Osp2C5B: 3<br/> da_lipo_5B: 13<br/> fringNC6B: 0<br/> fOringC6B: 0</p> |
| <p>439 2167240</p>  <p>IC50(nM): 12<br/> fringNplaN4B: 0<br/> fsp3Csp2N5B: 0<br/> N_H_2B: 4<br/> fsp2Osp2C5B: 3<br/> da_lipo_5B: 15<br/> fringNC6B: 0<br/> fOringC6B: 0</p> | <p>440 2169237</p>  <p>IC50(nM): 13.87<br/> fringNplaN4B: 0<br/> fsp3Csp2N5B: 0<br/> N_H_2B: 4<br/> fsp2Osp2C5B: 3<br/> da_lipo_5B: 14<br/> fringNC6B: 0<br/> fOringC6B: 0</p> | <p>441 2180292</p>  <p>IC50(nM): 5.9<br/> fringNplaN4B: 0<br/> fsp3Csp2N5B: 0<br/> N_H_2B: 4<br/> fsp2Osp2C5B: 3<br/> da_lipo_5B: 14<br/> fringNC6B: 0<br/> fOringC6B: 0</p> |

|                                                                                                                                                                                                                                                          |                                                                                                                                                                                                                                                             |                                                                                                                                                                                                                                                          |
|----------------------------------------------------------------------------------------------------------------------------------------------------------------------------------------------------------------------------------------------------------|-------------------------------------------------------------------------------------------------------------------------------------------------------------------------------------------------------------------------------------------------------------|----------------------------------------------------------------------------------------------------------------------------------------------------------------------------------------------------------------------------------------------------------|
| <p>442 2183746</p> 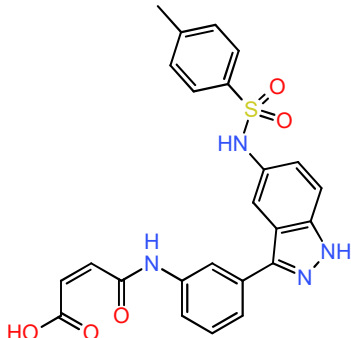 <p>IC50(nM): 32<br/>fringNplaN4B: 0<br/>fsp3Csp2N5B: 0<br/>N_H_2B: 4<br/>fsp2Osp2C5B: 5<br/>da_lipo_5B: 17<br/>fringNC6B: 1<br/>fOringC6B: 3</p>    | <p>443 2184713</p>  <p>IC50(nM): 28<br/>fringNplaN4B: 0<br/>fsp3Csp2N5B: 0<br/>N_H_2B: 4<br/>fsp2Osp2C5B: 5<br/>da_lipo_5B: 17<br/>fringNC6B: 1<br/>fOringC6B: 3</p>      | <p>444 2192698</p>  <p>IC50(nM): 30<br/>fringNplaN4B: 0<br/>fsp3Csp2N5B: 0<br/>N_H_2B: 4<br/>fsp2Osp2C5B: 5<br/>da_lipo_5B: 17<br/>fringNC6B: 1<br/>fOringC6B: 3</p>  |
| <p>445 2195980</p>  <p>IC50(nM): 52<br/>fringNplaN4B: 0<br/>fsp3Csp2N5B: 0<br/>N_H_2B: 4<br/>fsp2Osp2C5B: 5<br/>da_lipo_5B: 17<br/>fringNC6B: 1<br/>fOringC6B: 3</p>    | <p>446 2228127</p>  <p>IC50(nM): 1000<br/>fringNplaN4B: 0<br/>fsp3Csp2N5B: 0<br/>N_H_2B: 3<br/>fsp2Osp2C5B: 2<br/>da_lipo_5B: 0<br/>fringNC6B: 0<br/>fOringC6B: 1</p>     | <p>447 2230634</p>  <p>IC50(nM): 853<br/>fringNplaN4B: 0<br/>fsp3Csp2N5B: 1<br/>N_H_2B: 6<br/>fsp2Osp2C5B: 2<br/>da_lipo_5B: 10<br/>fringNC6B: 1<br/>fOringC6B: 3</p> |
| <p>448 2237689</p>  <p>IC50(nM): 1000<br/>fringNplaN4B: 0<br/>fsp3Csp2N5B: 0<br/>N_H_2B: 3<br/>fsp2Osp2C5B: 2<br/>da_lipo_5B: 0<br/>fringNC6B: 0<br/>fOringC6B: 0</p> | <p>449 2238403</p>  <p>IC50(nM): 192.5<br/>fringNplaN4B: 0<br/>fsp3Csp2N5B: 0<br/>N_H_2B: 4<br/>fsp2Osp2C5B: 4<br/>da_lipo_5B: 16<br/>fringNC6B: 3<br/>fOringC6B: 2</p> | <p>450 2254147</p>  <p>IC50(nM): 5<br/>fringNplaN4B: 1<br/>fsp3Csp2N5B: 1<br/>N_H_2B: 7<br/>fsp2Osp2C5B: 3<br/>da_lipo_5B: 11<br/>fringNC6B: 1<br/>fOringC6B: 1</p> |

|                                                                                                                                                                                                                                                                |                                                                                                                                                                                                                                                                   |                                                                                                                                                                                                                                                                    |
|----------------------------------------------------------------------------------------------------------------------------------------------------------------------------------------------------------------------------------------------------------------|-------------------------------------------------------------------------------------------------------------------------------------------------------------------------------------------------------------------------------------------------------------------|--------------------------------------------------------------------------------------------------------------------------------------------------------------------------------------------------------------------------------------------------------------------|
| <p>451 2254163</p> 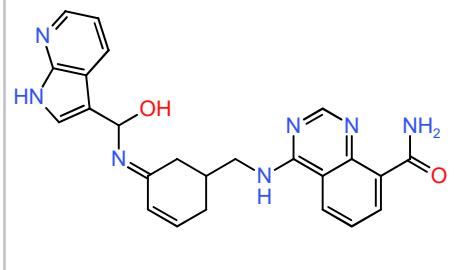 <p>IC50(nM): 13<br/> fringNplaN4B: 1<br/> fsp3Csp2N5B: 1<br/> N_H_2B: 7<br/> fsp2Osp2C5B: 3<br/> da_lipo_5B: 14<br/> fringNC6B: 2<br/> fOringC6B: 2</p>   | <p>452 2262770</p>  <p>IC50(nM): 60.2<br/> fringNplaN4B: 0<br/> fsp3Csp2N5B: 1<br/> N_H_2B: 5<br/> fsp2Osp2C5B: 4<br/> da_lipo_5B: 16<br/> fringNC6B: 4<br/> fOringC6B: 2</p>   | <p>453 2263291</p>  <p>IC50(nM): 101<br/> fringNplaN4B: 0<br/> fsp3Csp2N5B: 1<br/> N_H_2B: 6<br/> fsp2Osp2C5B: 0<br/> da_lipo_5B: 10<br/> fringNC6B: 1<br/> fOringC6B: 0</p>    |
| <p>454 2265664</p>  <p>IC50(nM): 50<br/> fringNplaN4B: 0<br/> fsp3Csp2N5B: 1<br/> N_H_2B: 6<br/> fsp2Osp2C5B: 0<br/> da_lipo_5B: 10<br/> fringNC6B: 1<br/> fOringC6B: 0</p>   | <p>455 2266562</p>  <p>IC50(nM): 75.1<br/> fringNplaN4B: 0<br/> fsp3Csp2N5B: 1<br/> N_H_2B: 6<br/> fsp2Osp2C5B: 0<br/> da_lipo_5B: 9<br/> fringNC6B: 1<br/> fOringC6B: 0</p>    | <p>456 2267767</p>  <p>IC50(nM): 145<br/> fringNplaN4B: 0<br/> fsp3Csp2N5B: 1<br/> N_H_2B: 6<br/> fsp2Osp2C5B: 0<br/> da_lipo_5B: 9<br/> fringNC6B: 1<br/> fOringC6B: 0</p>     |
| <p>457 2268090</p>  <p>IC50(nM): 452<br/> fringNplaN4B: 0<br/> fsp3Csp2N5B: 1<br/> N_H_2B: 6<br/> fsp2Osp2C5B: 0<br/> da_lipo_5B: 6<br/> fringNC6B: 1<br/> fOringC6B: 0</p> | <p>458 2269322</p>  <p>IC50(nM): 73.3<br/> fringNplaN4B: 0<br/> fsp3Csp2N5B: 1<br/> N_H_2B: 5<br/> fsp2Osp2C5B: 4<br/> da_lipo_5B: 16<br/> fringNC6B: 4<br/> fOringC6B: 2</p> | <p>459 2271208</p>  <p>IC50(nM): 25.7<br/> fringNplaN4B: 0<br/> fsp3Csp2N5B: 1<br/> N_H_2B: 6<br/> fsp2Osp2C5B: 0<br/> da_lipo_5B: 10<br/> fringNC6B: 1<br/> fOringC6B: 0</p> |

|                                                                                                                                                                                                                                                                 |                                                                                                                                                                                                                                                                   |                                                                                                                                                                                                                                                                    |
|-----------------------------------------------------------------------------------------------------------------------------------------------------------------------------------------------------------------------------------------------------------------|-------------------------------------------------------------------------------------------------------------------------------------------------------------------------------------------------------------------------------------------------------------------|--------------------------------------------------------------------------------------------------------------------------------------------------------------------------------------------------------------------------------------------------------------------|
| <p>460 2271892</p> 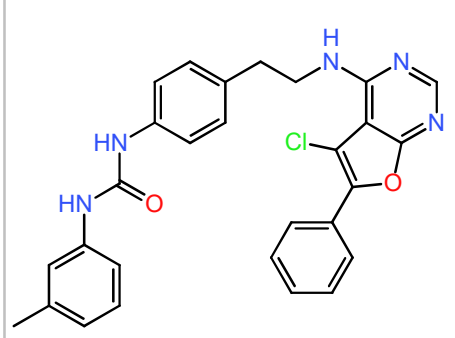 <p>IC50(nM): 74.9<br/> fringNplaN4B: 0<br/> fsp3Csp2N5B: 1<br/> N_H_2B: 5<br/> fsp2Osp2C5B: 4<br/> da_lipo_5B: 16<br/> fringNC6B: 4<br/> fOringC6B: 2</p>  | <p>461 2271936</p>  <p>IC50(nM): 102<br/> fringNplaN4B: 0<br/> fsp3Csp2N5B: 1<br/> N_H_2B: 6<br/> fsp2Osp2C5B: 0<br/> da_lipo_5B: 9<br/> fringNC6B: 1<br/> fOringC6B: 0</p>     | <p>462 2274951</p>  <p>IC50(nM): 128.75<br/> fringNplaN4B: 0<br/> fsp3Csp2N5B: 1<br/> N_H_2B: 5<br/> fsp2Osp2C5B: 4<br/> da_lipo_5B: 15<br/> fringNC6B: 4<br/> fOringC6B: 2</p> |
| <p>463 2277259</p>  <p>IC50(nM): 89.2<br/> fringNplaN4B: 0<br/> fsp3Csp2N5B: 1<br/> N_H_2B: 6<br/> fsp2Osp2C5B: 0<br/> da_lipo_5B: 10<br/> fringNC6B: 1<br/> fOringC6B: 0</p>  | <p>464 2278710</p>  <p>IC50(nM): 91.7<br/> fringNplaN4B: 0<br/> fsp3Csp2N5B: 1<br/> N_H_2B: 6<br/> fsp2Osp2C5B: 0<br/> da_lipo_5B: 6<br/> fringNC6B: 1<br/> fOringC6B: 0</p>    | <p>465 2287003</p>  <p>IC50(nM): 170<br/> fringNplaN4B: 0<br/> fsp3Csp2N5B: 0<br/> N_H_2B: 6<br/> fsp2Osp2C5B: 0<br/> da_lipo_5B: 1<br/> fringNC6B: 0<br/> fOringC6B: 0</p>     |
| <p>466 2297672</p>  <p>IC50(nM): 56.5<br/> fringNplaN4B: 0<br/> fsp3Csp2N5B: 1<br/> N_H_2B: 5<br/> fsp2Osp2C5B: 0<br/> da_lipo_5B: 4<br/> fringNC6B: 0<br/> fOringC6B: 0</p> | <p>467 2297876</p>  <p>IC50(nM): 110.5<br/> fringNplaN4B: 0<br/> fsp3Csp2N5B: 1<br/> N_H_2B: 7<br/> fsp2Osp2C5B: 0<br/> da_lipo_5B: 4<br/> fringNC6B: 0<br/> fOringC6B: 0</p> | <p>468 2298199</p>  <p>IC50(nM): 244<br/> fringNplaN4B: 0<br/> fsp3Csp2N5B: 1<br/> N_H_2B: 6<br/> fsp2Osp2C5B: 0<br/> da_lipo_5B: 4<br/> fringNC6B: 0<br/> fOringC6B: 0</p>   |

|                                                                                                                                                                                                                                                                      |                                                                                                                                                                                                                                                                  |                                                                                                                                                                                                                                                                    |
|----------------------------------------------------------------------------------------------------------------------------------------------------------------------------------------------------------------------------------------------------------------------|------------------------------------------------------------------------------------------------------------------------------------------------------------------------------------------------------------------------------------------------------------------|--------------------------------------------------------------------------------------------------------------------------------------------------------------------------------------------------------------------------------------------------------------------|
| <p>469 2298414</p> 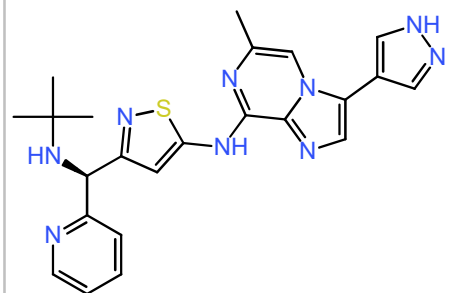 <p>IC50(nM): 17.28714286<br/> fringNplaN4B: 0<br/> fsp3Csp2N5B: 1<br/> N_H_2B: 7<br/> fsp2Osp2C5B: 0<br/> da_lipo_5B: 9<br/> fringNC6B: 0<br/> fOringC6B: 0</p> | <p>470 2298470</p>  <p>IC50(nM): 97.5<br/> fringNplaN4B: 0<br/> fsp3Csp2N5B: 1<br/> N_H_2B: 6<br/> fsp2Osp2C5B: 0<br/> da_lipo_5B: 4<br/> fringNC6B: 0<br/> fOringC6B: 0</p>   | <p>471 2298527</p>  <p>IC50(nM): 249.5<br/> fringNplaN4B: 0<br/> fsp3Csp2N5B: 1<br/> N_H_2B: 6<br/> fsp2Osp2C5B: 0<br/> da_lipo_5B: 4<br/> fringNC6B: 0<br/> fOringC6B: 0</p>   |
| <p>472 2298675</p>  <p>IC50(nM): 48<br/> fringNplaN4B: 0<br/> fsp3Csp2N5B: 1<br/> N_H_2B: 7<br/> fsp2Osp2C5B: 0<br/> da_lipo_5B: 3<br/> fringNC6B: 0<br/> fOringC6B: 0</p>          | <p>473 2298985</p>  <p>IC50(nM): 131.5<br/> fringNplaN4B: 0<br/> fsp3Csp2N5B: 1<br/> N_H_2B: 6<br/> fsp2Osp2C5B: 0<br/> da_lipo_5B: 4<br/> fringNC6B: 0<br/> fOringC6B: 0</p>  | <p>474 2299148</p>  <p>IC50(nM): 194.5<br/> fringNplaN4B: 0<br/> fsp3Csp2N5B: 1<br/> N_H_2B: 6<br/> fsp2Osp2C5B: 0<br/> da_lipo_5B: 4<br/> fringNC6B: 0<br/> fOringC6B: 0</p>   |
| <p>475 2299195</p>  <p>IC50(nM): 129<br/> fringNplaN4B: 0<br/> fsp3Csp2N5B: 1<br/> N_H_2B: 6<br/> fsp2Osp2C5B: 1<br/> da_lipo_5B: 4<br/> fringNC6B: 0<br/> fOringC6B: 1</p>       | <p>476 2299215</p>  <p>IC50(nM): 265<br/> fringNplaN4B: 0<br/> fsp3Csp2N5B: 0<br/> N_H_2B: 4<br/> fsp2Osp2C5B: 2<br/> da_lipo_5B: 10<br/> fringNC6B: 1<br/> fOringC6B: 2</p> | <p>477 2299460</p>  <p>IC50(nM): 184.5<br/> fringNplaN4B: 0<br/> fsp3Csp2N5B: 1<br/> N_H_2B: 5<br/> fsp2Osp2C5B: 0<br/> da_lipo_5B: 4<br/> fringNC6B: 0<br/> fOringC6B: 1</p> |

|                                                                                                                                                                                                                                                             |                                                                                                                                                                                                                                                          |                                                                                                                                                                                                                                                           |
|-------------------------------------------------------------------------------------------------------------------------------------------------------------------------------------------------------------------------------------------------------------|----------------------------------------------------------------------------------------------------------------------------------------------------------------------------------------------------------------------------------------------------------|-----------------------------------------------------------------------------------------------------------------------------------------------------------------------------------------------------------------------------------------------------------|
| <p>478 2299573</p> 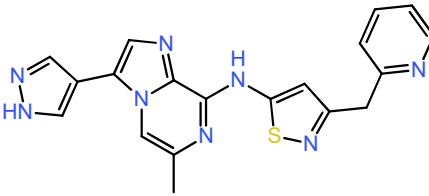 <p>IC50(nM):43.3666667<br/> fringNplaN4B:0<br/> fsp3Csp2N5B:1<br/> N_H_2B:6<br/> fsp2Osp2C5B:0<br/> da_lipo_5B:4<br/> fringNC6B:0<br/> fOringC6B:0</p> | <p>479 2300048</p>  <p>IC50(nM):151<br/> fringNplaN4B:0<br/> fsp3Csp2N5B:1<br/> N_H_2B:6<br/> fsp2Osp2C5B:0<br/> da_lipo_5B:4<br/> fringNC6B:0<br/> fOringC6B:0</p>    | <p>480 2300295</p>  <p>IC50(nM):105<br/> fringNplaN4B:1<br/> fsp3Csp2N5B:0<br/> N_H_2B:5<br/> fsp2Osp2C5B:2<br/> da_lipo_5B:8<br/> fringNC6B:0<br/> fOringC6B:2</p>    |
| <p>481 2300309</p>  <p>IC50(nM):286<br/> fringNplaN4B:0<br/> fsp3Csp2N5B:1<br/> N_H_2B:5<br/> fsp2Osp2C5B:0<br/> da_lipo_5B:7<br/> fringNC6B:0<br/> fOringC6B:1</p>        | <p>482 2300335</p>  <p>IC50(nM):250<br/> fringNplaN4B:0<br/> fsp3Csp2N5B:1<br/> N_H_2B:6<br/> fsp2Osp2C5B:1<br/> da_lipo_5B:3<br/> fringNC6B:0<br/> fOringC6B:1</p>    | <p>483 2300558</p>  <p>IC50(nM):132<br/> fringNplaN4B:0<br/> fsp3Csp2N5B:0<br/> N_H_2B:5<br/> fsp2Osp2C5B:1<br/> da_lipo_5B:17<br/> fringNC6B:1<br/> fOringC6B:2</p>   |
| <p>484 2300626</p>  <p>IC50(nM):191.5<br/> fringNplaN4B:0<br/> fsp3Csp2N5B:1<br/> N_H_2B:7<br/> fsp2Osp2C5B:0<br/> da_lipo_5B:3<br/> fringNC6B:0<br/> fOringC6B:0</p>    | <p>485 2300799</p>  <p>IC50(nM):50.5<br/> fringNplaN4B:0<br/> fsp3Csp2N5B:1<br/> N_H_2B:5<br/> fsp2Osp2C5B:0<br/> da_lipo_5B:4<br/> fringNC6B:0<br/> fOringC6B:0</p> | <p>486 2300903</p>  <p>IC50(nM):98.5<br/> fringNplaN4B:0<br/> fsp3Csp2N5B:1<br/> N_H_2B:7<br/> fsp2Osp2C5B:0<br/> da_lipo_5B:3<br/> fringNC6B:0<br/> fOringC6B:0</p> |

|                                                                                                                                                                                                                                                         |                                                                                                                                                                                                                                                             |                                                                                                                                                                                                                                                             |
|---------------------------------------------------------------------------------------------------------------------------------------------------------------------------------------------------------------------------------------------------------|-------------------------------------------------------------------------------------------------------------------------------------------------------------------------------------------------------------------------------------------------------------|-------------------------------------------------------------------------------------------------------------------------------------------------------------------------------------------------------------------------------------------------------------|
| <p>487 2301077</p> 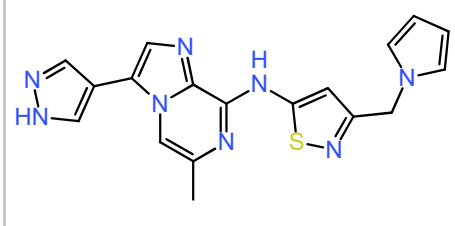 <p>IC50(nM):271.5<br/> fringNplaN4B:0<br/> fsp3Csp2N5B:1<br/> N_H_2B:6<br/> fsp2Osp2C5B:0<br/> da_lipo_5B:3<br/> fringNC6B:0<br/> fOringC6B:0</p>  | <p>488 2301078</p>  <p>IC50(nM):15<br/> fringNplaN4B:0<br/> fsp3Csp2N5B:1<br/> N_H_2B:6<br/> fsp2Osp2C5B:2<br/> da_lipo_5B:10<br/> fringNC6B:1<br/> fOringC6B:1</p>       | <p>489 2301626</p>  <p>IC50(nM):108<br/> fringNplaN4B:0<br/> fsp3Csp2N5B:1<br/> N_H_2B:7<br/> fsp2Osp2C5B:0<br/> da_lipo_5B:4<br/> fringNC6B:0<br/> fOringC6B:0</p>      |
| <p>490 2303454</p>  <p>IC50(nM):5047.5<br/> fringNplaN4B:0<br/> fsp3Csp2N5B:0<br/> N_H_2B:3<br/> fsp2Osp2C5B:4<br/> da_lipo_5B:6<br/> fringNC6B:0<br/> fOringC6B:4</p> | <p>491 2303892</p>  <p>IC50(nM):5047.5<br/> fringNplaN4B:0<br/> fsp3Csp2N5B:0<br/> N_H_2B:3<br/> fsp2Osp2C5B:4<br/> da_lipo_5B:6<br/> fringNC6B:0<br/> fOringC6B:4</p>    | <p>492 2305350</p>  <p>IC50(nM):5035.5<br/> fringNplaN4B:0<br/> fsp3Csp2N5B:0<br/> N_H_2B:3<br/> fsp2Osp2C5B:4<br/> da_lipo_5B:10<br/> fringNC6B:1<br/> fOringC6B:4</p>  |
| <p>493 2306374</p>  <p>IC50(nM):5042<br/> fringNplaN4B:0<br/> fsp3Csp2N5B:0<br/> N_H_2B:3<br/> fsp2Osp2C5B:4<br/> da_lipo_5B:6<br/> fringNC6B:0<br/> fOringC6B:4</p> | <p>494 2306806</p>  <p>IC50(nM):5039.5<br/> fringNplaN4B:0<br/> fsp3Csp2N5B:0<br/> N_H_2B:3<br/> fsp2Osp2C5B:4<br/> da_lipo_5B:10<br/> fringNC6B:0<br/> fOringC6B:4</p> | <p>495 2307651</p>  <p>IC50(nM):5048.5<br/> fringNplaN4B:0<br/> fsp3Csp2N5B:0<br/> N_H_2B:3<br/> fsp2Osp2C5B:4<br/> da_lipo_5B:6<br/> fringNC6B:0<br/> fOringC6B:4</p> |

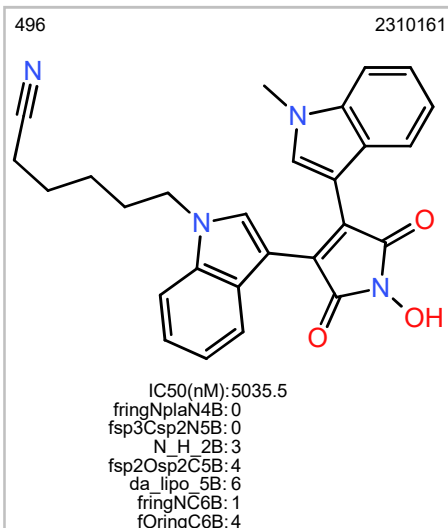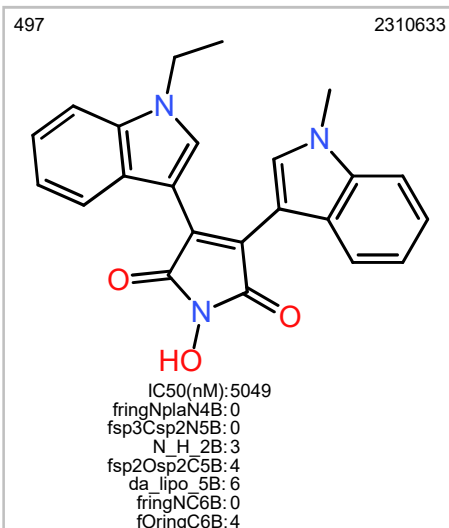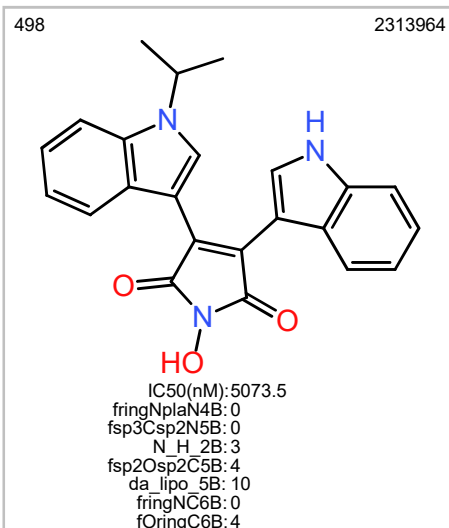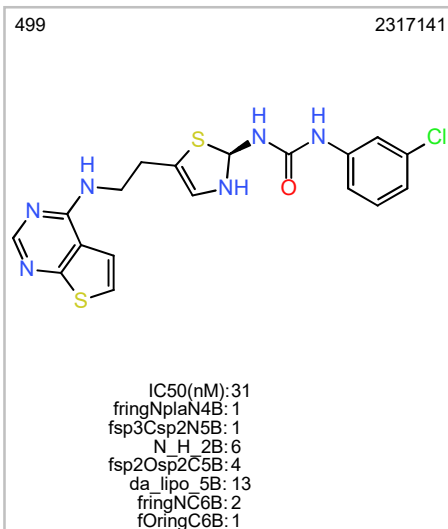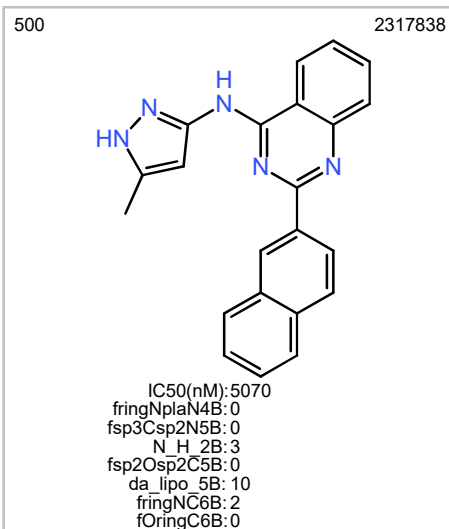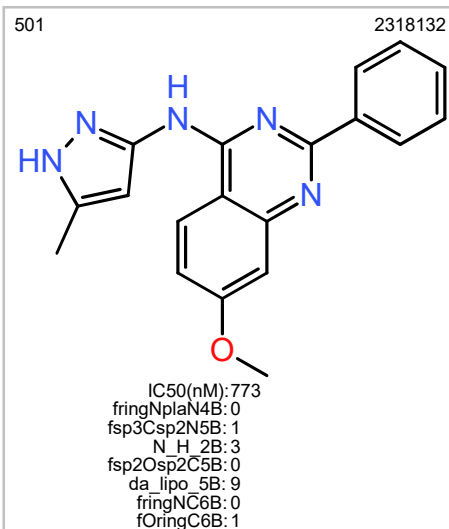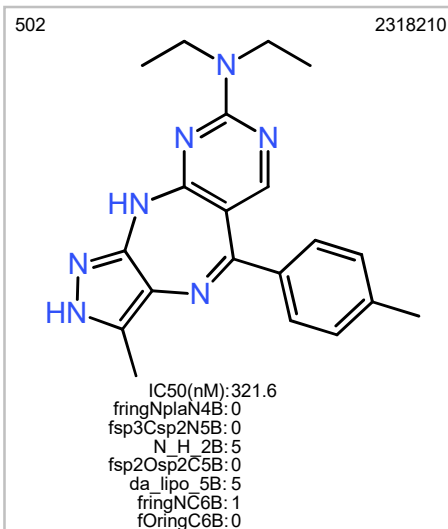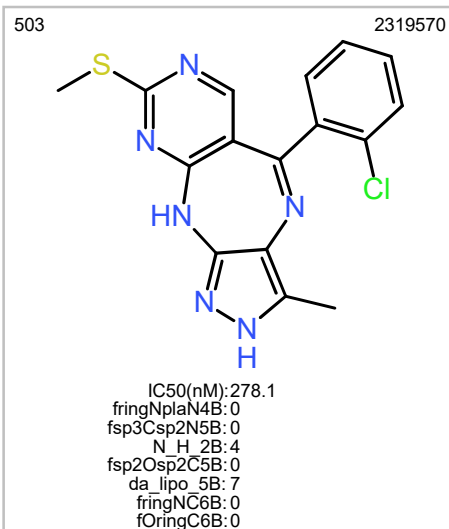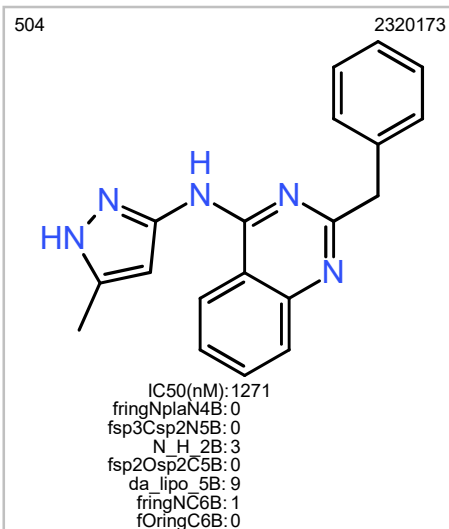



|                                                                                                                                                                                                                                                           |                                                                                                                                                                                                                                                            |                                                                                                                                                                                                                                                            |
|-----------------------------------------------------------------------------------------------------------------------------------------------------------------------------------------------------------------------------------------------------------|------------------------------------------------------------------------------------------------------------------------------------------------------------------------------------------------------------------------------------------------------------|------------------------------------------------------------------------------------------------------------------------------------------------------------------------------------------------------------------------------------------------------------|
| <p>505 2321271</p> 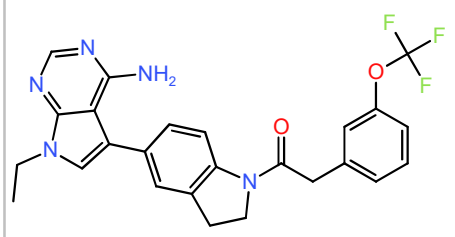 <p>IC50(nM):210<br/> fringNplaN4B:0<br/> fsp3Csp2N5B:1<br/> N_H_2B:5<br/> fsp2Osp2C5B:4<br/> da_lipo_5B:5<br/> fringNC6B:1<br/> fOringC6B:1</p>      | <p>506 2321294</p>  <p>IC50(nM):11500<br/> fringNplaN4B:0<br/> fsp3Csp2N5B:0<br/> N_H_2B:3<br/> fsp2Osp2C5B:3<br/> da_lipo_5B:8<br/> fringNC6B:1<br/> fOringC6B:3</p>    | <p>507 2321596</p>  <p>IC50(nM):2522<br/> fringNplaN4B:0<br/> fsp3Csp2N5B:1<br/> N_H_2B:4<br/> fsp2Osp2C5B:0<br/> da_lipo_5B:9<br/> fringNC6B:1<br/> fOringC6B:1</p>    |
| <p>508 2321921</p>  <p>IC50(nM):611<br/> fringNplaN4B:0<br/> fsp3Csp2N5B:0<br/> N_H_2B:4<br/> fsp2Osp2C5B:0<br/> da_lipo_5B:7<br/> fringNC6B:0<br/> fOringC6B:0</p>      | <p>509 2321978</p>  <p>IC50(nM):41<br/> fringNplaN4B:0<br/> fsp3Csp2N5B:0<br/> N_H_2B:4<br/> fsp2Osp2C5B:3<br/> da_lipo_5B:13<br/> fringNC6B:2<br/> fOringC6B:1</p>      | <p>510 2322312</p>  <p>IC50(nM):854.4<br/> fringNplaN4B:0<br/> fsp3Csp2N5B:0<br/> N_H_2B:4<br/> fsp2Osp2C5B:0<br/> da_lipo_5B:7<br/> fringNC6B:1<br/> fOringC6B:0</p>   |
| <p>511 2322741</p>  <p>IC50(nM):2320.6<br/> fringNplaN4B:0<br/> fsp3Csp2N5B:0<br/> N_H_2B:4<br/> fsp2Osp2C5B:0<br/> da_lipo_5B:6<br/> fringNC6B:0<br/> fOringC6B:2</p> | <p>512 2325459</p>  <p>IC50(nM):1184.7<br/> fringNplaN4B:0<br/> fsp3Csp2N5B:0<br/> N_H_2B:5<br/> fsp2Osp2C5B:0<br/> da_lipo_5B:8<br/> fringNC6B:1<br/> fOringC6B:0</p> | <p>513 2326090</p>  <p>IC50(nM):610.5<br/> fringNplaN4B:0<br/> fsp3Csp2N5B:0<br/> N_H_2B:4<br/> fsp2Osp2C5B:0<br/> da_lipo_5B:7<br/> fringNC6B:0<br/> fOringC6B:0</p> |

|                                                                                                                                                                                                                                                                   |                                                                                                                                                                                                                                                                    |                                                                                                                                                                                                                                                                  |
|-------------------------------------------------------------------------------------------------------------------------------------------------------------------------------------------------------------------------------------------------------------------|--------------------------------------------------------------------------------------------------------------------------------------------------------------------------------------------------------------------------------------------------------------------|------------------------------------------------------------------------------------------------------------------------------------------------------------------------------------------------------------------------------------------------------------------|
| <p>514 2326870</p> 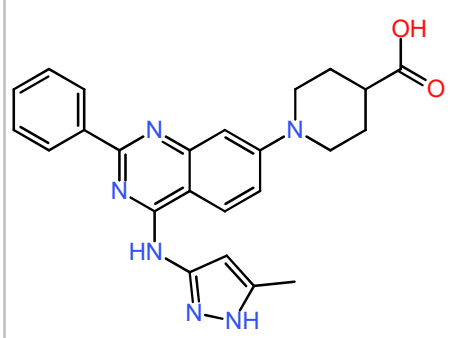 <p>IC50(nM): 127<br/> fringNplaN4B: 0<br/> fsp3Csp2N5B: 1<br/> N_H_2B: 4<br/> fsp2Osp2C5B: 0<br/> da_lipo_5B: 12<br/> fringNC6B: 0<br/> fOringC6B: 1</p>     | <p>515 2328465</p>  <p>IC50(nM): 17.75<br/> fringNplaN4B: 0<br/> fsp3Csp2N5B: 0<br/> N_H_2B: 5<br/> fsp2Osp2C5B: 2<br/> da_lipo_5B: 16<br/> fringNC6B: 0<br/> fOringC6B: 2</p>   | <p>516 2328510</p>  <p>IC50(nM): 1147<br/> fringNplaN4B: 0<br/> fsp3Csp2N5B: 0<br/> N_H_2B: 3<br/> fsp2Osp2C5B: 0<br/> da_lipo_5B: 10<br/> fringNC6B: 0<br/> fOringC6B: 0</p> |
| <p>517 2328881</p>  <p>IC50(nM): 86<br/> fringNplaN4B: 0<br/> fsp3Csp2N5B: 0<br/> N_H_2B: 6<br/> fsp2Osp2C5B: 0<br/> da_lipo_5B: 5<br/> fringNC6B: 1<br/> fOringC6B: 0</p>       | <p>518 2329580</p>  <p>IC50(nM): 893<br/> fringNplaN4B: 0<br/> fsp3Csp2N5B: 0<br/> N_H_2B: 3<br/> fsp2Osp2C5B: 0<br/> da_lipo_5B: 8<br/> fringNC6B: 1<br/> fOringC6B: 2</p>      | <p>519 2329793</p>  <p>IC50(nM): 1620<br/> fringNplaN4B: 0<br/> fsp3Csp2N5B: 0<br/> N_H_2B: 4<br/> fsp2Osp2C5B: 0<br/> da_lipo_5B: 7<br/> fringNC6B: 0<br/> fOringC6B: 0</p>  |
| <p>520 2330206</p>  <p>IC50(nM): 1003.6<br/> fringNplaN4B: 0<br/> fsp3Csp2N5B: 0<br/> N_H_2B: 4<br/> fsp2Osp2C5B: 0<br/> da_lipo_5B: 7<br/> fringNC6B: 0<br/> fOringC6B: 0</p> | <p>521 2330594</p>  <p>IC50(nM): 2681.5<br/> fringNplaN4B: 0<br/> fsp3Csp2N5B: 0<br/> N_H_2B: 4<br/> fsp2Osp2C5B: 0<br/> da_lipo_5B: 7<br/> fringNC6B: 0<br/> fOringC6B: 1</p> | <p>522 2331020</p>  <p>IC50(nM): 352<br/> fringNplaN4B: 0<br/> fsp3Csp2N5B: 0<br/> N_H_2B: 5<br/> fsp2Osp2C5B: 0<br/> da_lipo_5B: 5<br/> fringNC6B: 1<br/> fOringC6B: 0</p> |

|                                                                                                                                                                                                                                                          |                                                                                                                                                                                                                                                           |                                                                                                                                                                                                                                                           |
|----------------------------------------------------------------------------------------------------------------------------------------------------------------------------------------------------------------------------------------------------------|-----------------------------------------------------------------------------------------------------------------------------------------------------------------------------------------------------------------------------------------------------------|-----------------------------------------------------------------------------------------------------------------------------------------------------------------------------------------------------------------------------------------------------------|
| <p>523 2331922</p> 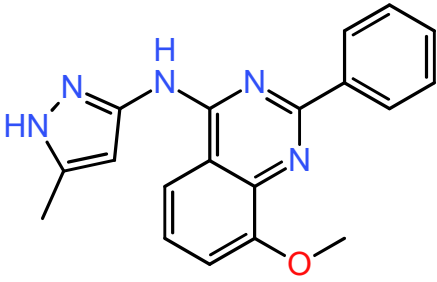 <p>IC50(nM):547<br/> fringNplaN4B:0<br/> fsp3Csp2N5B:0<br/> N_H_2B:3<br/> fsp2Osp2C5B:0<br/> da_lipo_5B:9<br/> fringNC6B:0<br/> fOringC6B:3</p>     | <p>524 2332203</p>  <p>IC50(nM):270<br/> fringNplaN4B:0<br/> fsp3Csp2N5B:1<br/> N_H_2B:5<br/> fsp2Osp2C5B:0<br/> da_lipo_5B:9<br/> fringNC6B:0<br/> fOringC6B:0</p>     | <p>525 2332915</p>  <p>IC50(nM):307.4<br/> fringNplaN4B:0<br/> fsp3Csp2N5B:0<br/> N_H_2B:4<br/> fsp2Osp2C5B:0<br/> da_lipo_5B:7<br/> fringNC6B:0<br/> fOringC6B:0</p>  |
| <p>526 2333609</p>  <p>IC50(nM):894<br/> fringNplaN4B:0<br/> fsp3Csp2N5B:0<br/> N_H_2B:4<br/> fsp2Osp2C5B:0<br/> da_lipo_5B:7<br/> fringNC6B:0<br/> fOringC6B:0</p>     | <p>527 2341713</p>  <p>IC50(nM):35<br/> fringNplaN4B:0<br/> fsp3Csp2N5B:0<br/> N_H_2B:6<br/> fsp2Osp2C5B:4<br/> da_lipo_5B:14<br/> fringNC6B:1<br/> fOringC6B:2</p>     | <p>528 2343585</p>  <p>IC50(nM):1258.9<br/> fringNplaN4B:0<br/> fsp3Csp2N5B:1<br/> N_H_2B:4<br/> fsp2Osp2C5B:0<br/> da_lipo_5B:6<br/> fringNC6B:2<br/> fOringC6B:0</p> |
| <p>529 2344424</p>  <p>IC50(nM):50.12<br/> fringNplaN4B:0<br/> fsp3Csp2N5B:1<br/> N_H_2B:6<br/> fsp2Osp2C5B:0<br/> da_lipo_5B:5<br/> fringNC6B:1<br/> fOringC6B:0</p> | <p>530 2345757</p>  <p>IC50(nM):1239<br/> fringNplaN4B:0<br/> fsp3Csp2N5B:0<br/> N_H_2B:3<br/> fsp2Osp2C5B:2<br/> da_lipo_5B:11<br/> fringNC6B:0<br/> fOringC6B:0</p> | <p>531 2346337</p>  <p>IC50(nM):63.1<br/> fringNplaN4B:0<br/> fsp3Csp2N5B:1<br/> N_H_2B:6<br/> fsp2Osp2C5B:0<br/> da_lipo_5B:7<br/> fringNC6B:0<br/> fOringC6B:0</p> |

|                                                                                                                                                                                                                                                                   |                                                                                                                                                                                                                                                                    |                                                                                                                                                                                                                                                                     |
|-------------------------------------------------------------------------------------------------------------------------------------------------------------------------------------------------------------------------------------------------------------------|--------------------------------------------------------------------------------------------------------------------------------------------------------------------------------------------------------------------------------------------------------------------|---------------------------------------------------------------------------------------------------------------------------------------------------------------------------------------------------------------------------------------------------------------------|
| <p>532 2346662</p> 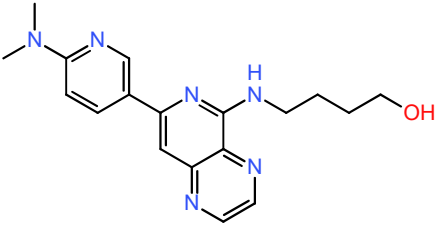 <p>IC50(nM): 100<br/> fringNplaN4B: 0<br/> fsp3Csp2N5B: 1<br/> N_H_2B: 5<br/> fsp2Osp2C5B: 0<br/> da_lipo_5B: 5<br/> fringNC6B: 1<br/> fOringC6B: 1</p>      | <p>533 2347062</p>  <p>IC50(nM): 13<br/> fringNplaN4B: 0<br/> fsp3Csp2N5B: 1<br/> N_H_2B: 5<br/> fsp2Osp2C5B: 4<br/> da_lipo_5B: 19<br/> fringNC6B: 1<br/> fOringC6B: 2</p>      | <p>534 2347821</p>  <p>IC50(nM): 8.5<br/> fringNplaN4B: 0<br/> fsp3Csp2N5B: 1<br/> N_H_2B: 5<br/> fsp2Osp2C5B: 4<br/> da_lipo_5B: 17<br/> fringNC6B: 1<br/> fOringC6B: 2</p>     |
| <p>535 2351542</p>  <p>IC50(nM): 50.12<br/> fringNplaN4B: 0<br/> fsp3Csp2N5B: 1<br/> N_H_2B: 5<br/> fsp2Osp2C5B: 0<br/> da_lipo_5B: 7<br/> fringNC6B: 0<br/> fOringC6B: 0</p>    | <p>536 2353443</p>  <p>IC50(nM): 900<br/> fringNplaN4B: 0<br/> fsp3Csp2N5B: 0<br/> N_H_2B: 3<br/> fsp2Osp2C5B: 0<br/> da_lipo_5B: 8<br/> fringNC6B: 0<br/> fOringC6B: 0</p>      | <p>537 2355605</p>  <p>IC50(nM): 6.9<br/> fringNplaN4B: 0<br/> fsp3Csp2N5B: 1<br/> N_H_2B: 5<br/> fsp2Osp2C5B: 4<br/> da_lipo_5B: 17<br/> fringNC6B: 1<br/> fOringC6B: 2</p>     |
| <p>538 2355704</p>  <p>IC50(nM): 89.715<br/> fringNplaN4B: 0<br/> fsp3Csp2N5B: 1<br/> N_H_2B: 6<br/> fsp2Osp2C5B: 0<br/> da_lipo_5B: 3<br/> fringNC6B: 0<br/> fOringC6B: 2</p> | <p>539 2360227</p>  <p>IC50(nM): 630.96<br/> fringNplaN4B: 0<br/> fsp3Csp2N5B: 1<br/> N_H_2B: 4<br/> fsp2Osp2C5B: 0<br/> da_lipo_5B: 5<br/> fringNC6B: 0<br/> fOringC6B: 1</p> | <p>540 2362102</p>  <p>IC50(nM): 630.96<br/> fringNplaN4B: 0<br/> fsp3Csp2N5B: 1<br/> N_H_2B: 6<br/> fsp2Osp2C5B: 0<br/> da_lipo_5B: 0<br/> fringNC6B: 0<br/> fOringC6B: 0</p> |

|                                                                                                                                                                                                                                                                  |                                                                                                                                                                                                                                                                  |                                                                                                                                                                                                                                                                    |
|------------------------------------------------------------------------------------------------------------------------------------------------------------------------------------------------------------------------------------------------------------------|------------------------------------------------------------------------------------------------------------------------------------------------------------------------------------------------------------------------------------------------------------------|--------------------------------------------------------------------------------------------------------------------------------------------------------------------------------------------------------------------------------------------------------------------|
| <p>541 2362277</p> 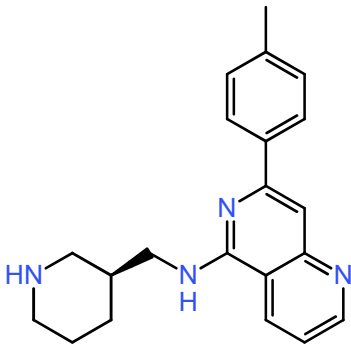 <p>IC50(nM): 1584.9<br/> fringNplaN4B: 0<br/> fsp3Csp2N5B: 1<br/> N_H_2B: 3<br/> fsp2Osp2C5B: 0<br/> da_lipo_5B: 10<br/> fringNC6B: 1<br/> fOringC6B: 0</p> | <p>542 2365854</p>  <p>IC50(nM): 251.19<br/> fringNplaN4B: 0<br/> fsp3Csp2N5B: 1<br/> N_H_2B: 6<br/> fsp2Osp2C5B: 0<br/> da_lipo_5B: 5<br/> fringNC6B: 0<br/> fOringC6B: 0</p> | <p>543 2367292</p>  <p>IC50(nM): 630.96<br/> fringNplaN4B: 0<br/> fsp3Csp2N5B: 1<br/> N_H_2B: 4<br/> fsp2Osp2C5B: 0<br/> da_lipo_5B: 7<br/> fringNC6B: 1<br/> fOringC6B: 0</p>  |
| <p>544 2367685</p>  <p>IC50(nM): 89.715<br/> fringNplaN4B: 0<br/> fsp3Csp2N5B: 1<br/> N_H_2B: 6<br/> fsp2Osp2C5B: 0<br/> da_lipo_5B: 8<br/> fringNC6B: 0<br/> fOringC6B: 0</p>  | <p>545 2375056</p>  <p>IC50(nM): 316.23<br/> fringNplaN4B: 0<br/> fsp3Csp2N5B: 1<br/> N_H_2B: 5<br/> fsp2Osp2C5B: 0<br/> da_lipo_5B: 9<br/> fringNC6B: 0<br/> fOringC6B: 0</p> | <p>546 2376550</p>  <p>IC50(nM): 79.43<br/> fringNplaN4B: 0<br/> fsp3Csp2N5B: 1<br/> N_H_2B: 6<br/> fsp2Osp2C5B: 1<br/> da_lipo_5B: 4<br/> fringNC6B: 0<br/> fOringC6B: 1</p>   |
| <p>547 2379836</p>  <p>IC50(nM): 100<br/> fringNplaN4B: 1<br/> fsp3Csp2N5B: 1<br/> N_H_2B: 5<br/> fsp2Osp2C5B: 0<br/> da_lipo_5B: 11<br/> fringNC6B: 0<br/> fOringC6B: 0</p>  | <p>548 2380159</p>  <p>IC50(nM): 63.1<br/> fringNplaN4B: 0<br/> fsp3Csp2N5B: 1<br/> N_H_2B: 5<br/> fsp2Osp2C5B: 0<br/> da_lipo_5B: 5<br/> fringNC6B: 0<br/> fOringC6B: 0</p> | <p>549 2385709</p>  <p>IC50(nM): 8530<br/> fringNplaN4B: 0<br/> fsp3Csp2N5B: 0<br/> N_H_2B: 2<br/> fsp2Osp2C5B: 0<br/> da_lipo_5B: 18<br/> fringNC6B: 3<br/> fOringC6B: 0</p> |

|                                                                                                                                                                                                                                                           |                                                                                                                                                                                                                                                           |                                                                                                                                                                                                                                                             |
|-----------------------------------------------------------------------------------------------------------------------------------------------------------------------------------------------------------------------------------------------------------|-----------------------------------------------------------------------------------------------------------------------------------------------------------------------------------------------------------------------------------------------------------|-------------------------------------------------------------------------------------------------------------------------------------------------------------------------------------------------------------------------------------------------------------|
| <p>550 2391808</p> 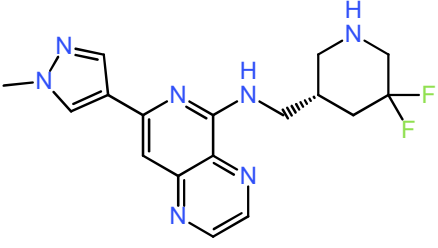 <p>IC50(nM):501.19<br/> fringNplaN4B:0<br/> fsp3Csp2N5B:1<br/> N_H_2B:6<br/> fsp2Osp2C5B:0<br/> da_lipo_5B:7<br/> fringNC6B:0<br/> fOringC6B:0</p>   | <p>551 2394312</p>  <p>IC50(nM):46.9<br/> fringNplaN4B:1<br/> fsp3Csp2N5B:0<br/> N_H_2B:5<br/> fsp2Osp2C5B:1<br/> da_lipo_5B:15<br/> fringNC6B:1<br/> fOringC6B:2</p>   | <p>552 2396581</p>  <p>IC50(nM):199.53<br/> fringNplaN4B:0<br/> fsp3Csp2N5B:0<br/> N_H_2B:4<br/> fsp2Osp2C5B:1<br/> da_lipo_5B:8<br/> fringNC6B:1<br/> fOringC6B:2</p>   |
| <p>553 2398720</p>  <p>IC50(nM):251.19<br/> fringNplaN4B:0<br/> fsp3Csp2N5B:1<br/> N_H_2B:6<br/> fsp2Osp2C5B:0<br/> da_lipo_5B:6<br/> fringNC6B:0<br/> fOringC6B:0</p>   | <p>554 2420095</p>  <p>IC50(nM):1000<br/> fringNplaN4B:0<br/> fsp3Csp2N5B:0<br/> N_H_2B:3<br/> fsp2Osp2C5B:2<br/> da_lipo_5B:0<br/> fringNC6B:0<br/> fOringC6B:1</p>    | <p>555 2423779</p>  <p>IC50(nM):6.9<br/> fringNplaN4B:0<br/> fsp3Csp2N5B:1<br/> N_H_2B:5<br/> fsp2Osp2C5B:4<br/> da_lipo_5B:17<br/> fringNC6B:1<br/> fOringC6B:2</p>     |
| <p>556 2431391</p>  <p>IC50(nM):158.49<br/> fringNplaN4B:0<br/> fsp3Csp2N5B:0<br/> N_H_2B:5<br/> fsp2Osp2C5B:0<br/> da_lipo_5B:5<br/> fringNC6B:0<br/> fOringC6B:0</p> | <p>557 2431526</p>  <p>IC50(nM):50.12<br/> fringNplaN4B:0<br/> fsp3Csp2N5B:1<br/> N_H_2B:5<br/> fsp2Osp2C5B:0<br/> da_lipo_5B:5<br/> fringNC6B:0<br/> fOringC6B:0</p> | <p>558 2434765</p>  <p>IC50(nM):222.25<br/> fringNplaN4B:0<br/> fsp3Csp2N5B:0<br/> N_H_2B:3<br/> fsp2Osp2C5B:0<br/> da_lipo_5B:8<br/> fringNC6B:1<br/> fOringC6B:0</p> |

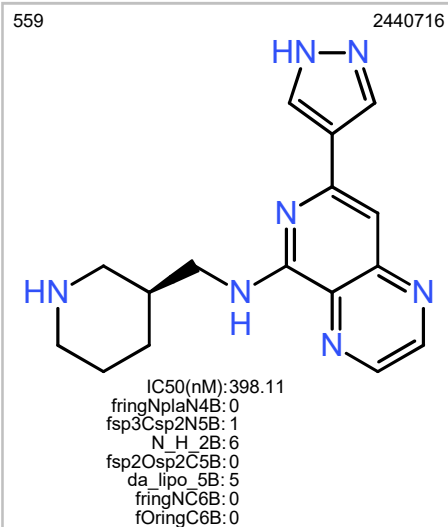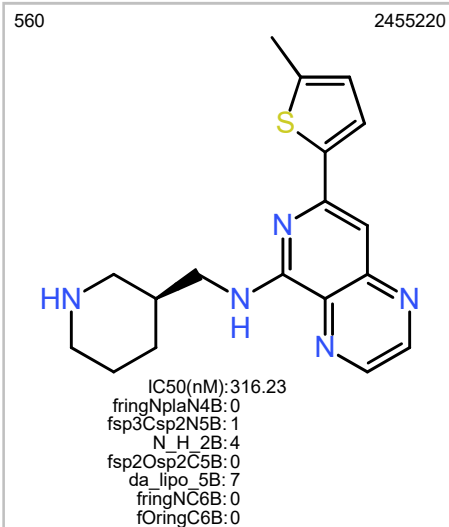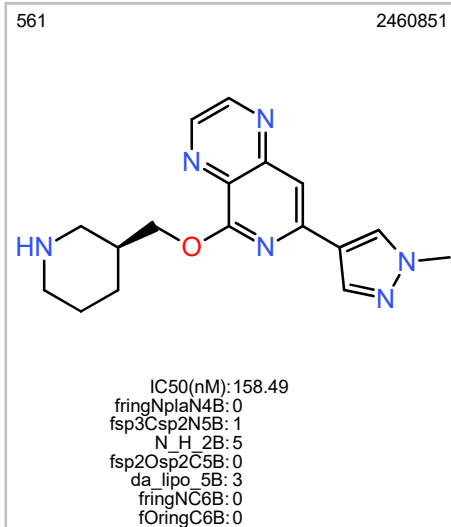

Supplement: s1 [file s1]
