# Supplementary material for: Pharmacophore Synergism in Diverse Scaffold Clinches in Aurora Kinase B
Source: MDPI journal article supplement (doi:10.3390/ijms232314527), 2022-11-22
Supplement: s1 [file s1]

# Pharmacophore Synergism in Diverse Scaffolds Clinches Aurora Kinase B

Vijay H. Masand <sup>1,\*</sup>, Sami A. Al-Hussain <sup>2</sup>, Mithilesh M. Rathore <sup>1</sup>, Sumer D. Thakur <sup>3</sup>, Siddhartha Akasapu <sup>4</sup>, Abdul Samad <sup>5</sup>, Aamal A. Al-Mutairi <sup>2</sup> and Magdi E. A. Zaki <sup>2,\*</sup>

## Statistical Parameters for Model-A:

$R^2_{tr} = 0.815$ ,  $R^2_{adj.} = 0.812$ ,  $R^2_{tr} - R^2_{adj.} = 0.003$ ,  $LOF = 0.234$ ,  $K_{xx} = 0.409$ ,  $\Delta K = 0.045$ ,  $RMSE_{tr} = 0.468$ ,  $MAE_{tr} = 0.401$ ,  $RSS_{tr} = 98.506$ ,  $CCC_{tr} = 0.898$ ,  $s = 0.473$ ,  $F = 277.836$ ,  $R^2_{cv} (Q^2_{loo}) = 0.808$ ,  $R^2 - R^2_{cv} = 0.007$ ,  $RMSE_{cv} = 0.477$ ,  $MAE_{cv} = 0.408$ ,  $PRESS_{cv} = 102.107$ ,  $CCC_{cv} = 0.895$ ,  $Q^2_{LMO} = 0.807$ ,  $R^2_{Yscr} = 0.016$ ,  $Q^2_{Yscr} = -0.02$ ,  $RMSE_{ex} = 0.446$ ,  $MAE_{ex} = 0.373$ ,  $PRESS_{ext} = 22.264$ ,  $R^2_{ex} = 0.814$ ,  $Q^2 - F^1 = 0.811$ ,  $Q^2 - F^2 = 0.811$ ,  $Q^2 - F^3 = 0.833$ ,  $CCC_{ex} = 0.9$ ,  $R^2 - ExPy = 0.814$ ,  $R'^2 = 0.79$ ,  $k' = 0.991$ ,  $1 - (R^2 / R'^2) = 0.029$ ,  $r'^2_m = 0.689$ ,  $R_{\sigma^2} = 0.812$ ,  $k = 1.005$ ,  $1 - (R^2 - ExPy / R_{\sigma^2}) = 0.002$ ,  $r^2_m = 0.779$ ,

**Table S1.** A comparison of two tautomeric forms YJA-T1 and YJA-T2 with respect to interactions with the receptor.

| Tautomer with descriptors value                            | H-bonds formed with distance (Å) with angle (Donor-Hydrogen-Acceptor) (cut-off: 5 Å)                                      | List of amino acids and solvent molecules whose at least one atom is within 5 Å from tautomeric form                                                                                                                   |
|------------------------------------------------------------|---------------------------------------------------------------------------------------------------------------------------|------------------------------------------------------------------------------------------------------------------------------------------------------------------------------------------------------------------------|
| YJA-T1<br>fsp3Csp2N5B = 0<br>N_H_2B = 6<br>fsp2Osp2C5B = 3 | LYS122 at 1.668 with 159.8°,<br>GLN145 at 2.251 with 142.4°,<br>ALA173 at 1.952 with 163.9°                               | <b>ARG97</b> , LEU99, PHE104, VAL107, ALA120, LYS122, LEU124, LEU138, GLU141, ILE142, GLN145, LEU154, MET156, LEU168, LEU170, PHE172, ALA173, GLU177, LEU223, ALA233, <b>ASP234</b> , <b>HOH2016</b>                   |
| YJA-T2<br>fsp3Csp2N5B = 1<br>N_H_2B = 7<br>fsp2Osp2C5B = 3 | LYS122 at 2.361 with 157.8°,<br>GLN145 at 2.323 with 115.7°,<br>ALA173 at 1.946 with 174.4°,<br>HOH2108 2.222 with 106.7° | LEU99, PHE104, VAL107, ALA120, LYS122, LEU124, LEU138, GLU141, ILE142, GLN145, LEU154, MET156, LEU168, LEU170, PHE172, ALA173, <b>ARG175</b> , GLU177, <b>LYS180</b> , LEU223, ALA233, <b>HOH2060</b> , <b>HOH2108</b> |

## Statistical parameters used for validation of QSAR models:

$$R^2 = 1 - \frac{\sum(y_i - \hat{y}_i)^2}{\sum(y_i - \bar{y})^2}$$

where  $y_i$  are the observed values of the response,  $\bar{y}$  the corresponding average,  $\hat{y}$  are the calculated values

$$Q^2 = 1 - \frac{\sum(y_i - \hat{y}_i)^2}{\sum(y_i - \bar{y})^2}$$

where  $y_i$  are the observed values of the response,  $\bar{y}$  the corresponding average,  $\hat{y}$  are the values predicted for each object when it is not in the training set.

$$Q_{F1}^2 = 1 - \frac{\sum_{i=1}^{n_{EXT}} (y_i - \hat{y}_i)^2}{\sum_{i=1}^{n_{EXT}} (y_i - \bar{y}_{TR})^2}$$

where  $y_i$  are the observed values of the response,  $\bar{y}$  the corresponding average,  $\hat{y}$  are the calculated values

$$Q_{F2}^2 = 1 - \frac{\sum_{i=1}^{n_{EXT}} (y_i - \hat{y}_i)^2}{\sum_{i=1}^{n_{EXT}} (y_i - \bar{y}_{EXT})^2}$$

where  $y_i$  are the observed values of the response,  $\bar{y}$  the corresponding average,  $\hat{y}$  are the calculated values

$$Q_{F3}^2 = 1 - \frac{\left[ \sum_{i=1}^{n_{EXT}} (y_i - \hat{y}_i)^2 \right] / n_{EXT}}{\left[ \sum_{i=1}^{n_{TR}} (y_i - \bar{y}_{TR})^2 \right] / n_{TR}}$$

where  $y_i$  are the observed values of the response,  $\bar{y}$  the corresponding average,  $\hat{y}$  are the calculated values

$$CCC = \frac{2 \sum_{i=1}^{n_{EXT}} (y_i - \bar{y})(\hat{y}_i - \bar{\hat{y}})}{\sum_{i=1}^{n_{EXT}} (y_i - \bar{y})^2 + \sum_{i=1}^{n_{EXT}} (\hat{y}_i - \bar{\hat{y}})^2 + n_{EXT} (\bar{y} - \bar{\hat{y}})^2}$$

$$k = \frac{\sum_{i=1}^{n_{EXT}} y_i \hat{y}_i}{\sum_{i=1}^{n_{EXT}} \hat{y}_i^2}$$

$$k' = \frac{\sum_{i=1}^{n_{EXT}} y_i \hat{y}_i}{\sum_{i=1}^{n_{EXT}} y_i^2}$$

$$r_m^2 = r^2 \left( 1 - \sqrt{r^2 - r_0^2} \right)$$

$$\overline{r_m^2} = \frac{(r_m^2 + r_m'^2)}{2}$$

$$RMSE = \sqrt{\frac{\sum_{i=1}^{n_{EXT}} (y_i - \hat{y}_i)^2}{n_{EXT}}}$$

$$MAE = \frac{\sum_{i=1}^{n_{EXT}} |y_i - \hat{y}_i|}{n_{EXT}}$$

where  $y_i$  are the observed values of the response,  $\bar{y}$  the corresponding average,  $\hat{y}$  are the calculated values
